# Supplementary material for: Prevalence of pre-diabetes and undiagnosed diabetes in the Mollerussa prospective observational cohort study in a semi-rural area of Catalonia
Source: PubMed Central journal article supplement — BMJ Open. 2020 Jan 20;10(1):e033332. doi: 10.1136/bmjopen-2019-033332 (PMC7044846; doi:10.1136/bmjopen-2019-033332), 2020-01-20
Supplement: bmjopen-2019-033332.draft_revisions.pdf [file bmjopen-2019-033332.draft_revisions.pdf]

# BMJ Open

BMJ Open is committed to open peer review. As part of this commitment we make the peer review history of every article we publish publicly available.

When an article is published we post the peer reviewers' comments and the authors' responses online. We also post the versions of the paper that were used during peer review. These are the versions that the peer review comments apply to.

The versions of the paper that follow are the versions that were submitted during the peer review process. They are not the versions of record or the final published versions. They should not be cited or distributed as the published version of this manuscript.

BMJ Open is an open access journal and the full, final, typeset and author-corrected version of record of the manuscript is available on our site with no access controls, subscription charges or pay-per-view fees (<http://bmjopen.bmj.com>).

If you have any questions on BMJ Open's open peer review process please email [info.bmjopen@bmj.com](mailto:info.bmjopen@bmj.com)

# BMJ Open

## Prevalence of prediabetes and undiagnosed diabetes in the Mollerussa cohort study

|                               |                                                                                                                                                                                                                                                                                                                                                                                                                                                                                                                                                                                                                                                                                                                                                                                                                                                                                                                                                                                                                                                                                                                                                                                                                                                                                                                                                                                                                                                                                                                                                                                                                                                                                                                                                                                                                                                                                                                                                                                                                                                                                                                                                                                                                                                                                                                                                                                                                                                                                                                                                                                                                                                                                                                                                                            |
|-------------------------------|----------------------------------------------------------------------------------------------------------------------------------------------------------------------------------------------------------------------------------------------------------------------------------------------------------------------------------------------------------------------------------------------------------------------------------------------------------------------------------------------------------------------------------------------------------------------------------------------------------------------------------------------------------------------------------------------------------------------------------------------------------------------------------------------------------------------------------------------------------------------------------------------------------------------------------------------------------------------------------------------------------------------------------------------------------------------------------------------------------------------------------------------------------------------------------------------------------------------------------------------------------------------------------------------------------------------------------------------------------------------------------------------------------------------------------------------------------------------------------------------------------------------------------------------------------------------------------------------------------------------------------------------------------------------------------------------------------------------------------------------------------------------------------------------------------------------------------------------------------------------------------------------------------------------------------------------------------------------------------------------------------------------------------------------------------------------------------------------------------------------------------------------------------------------------------------------------------------------------------------------------------------------------------------------------------------------------------------------------------------------------------------------------------------------------------------------------------------------------------------------------------------------------------------------------------------------------------------------------------------------------------------------------------------------------------------------------------------------------------------------------------------------------|
| Journal:                      | <i>BMJ Open</i>                                                                                                                                                                                                                                                                                                                                                                                                                                                                                                                                                                                                                                                                                                                                                                                                                                                                                                                                                                                                                                                                                                                                                                                                                                                                                                                                                                                                                                                                                                                                                                                                                                                                                                                                                                                                                                                                                                                                                                                                                                                                                                                                                                                                                                                                                                                                                                                                                                                                                                                                                                                                                                                                                                                                                            |
| Manuscript ID                 | bmjopen-2019-033332                                                                                                                                                                                                                                                                                                                                                                                                                                                                                                                                                                                                                                                                                                                                                                                                                                                                                                                                                                                                                                                                                                                                                                                                                                                                                                                                                                                                                                                                                                                                                                                                                                                                                                                                                                                                                                                                                                                                                                                                                                                                                                                                                                                                                                                                                                                                                                                                                                                                                                                                                                                                                                                                                                                                                        |
| Article Type:                 | Original research                                                                                                                                                                                                                                                                                                                                                                                                                                                                                                                                                                                                                                                                                                                                                                                                                                                                                                                                                                                                                                                                                                                                                                                                                                                                                                                                                                                                                                                                                                                                                                                                                                                                                                                                                                                                                                                                                                                                                                                                                                                                                                                                                                                                                                                                                                                                                                                                                                                                                                                                                                                                                                                                                                                                                          |
| Date Submitted by the Author: | 30-Jul-2019                                                                                                                                                                                                                                                                                                                                                                                                                                                                                                                                                                                                                                                                                                                                                                                                                                                                                                                                                                                                                                                                                                                                                                                                                                                                                                                                                                                                                                                                                                                                                                                                                                                                                                                                                                                                                                                                                                                                                                                                                                                                                                                                                                                                                                                                                                                                                                                                                                                                                                                                                                                                                                                                                                                                                                |
| Complete List of Authors:     | <p>Falguera, Mireia; Primary Health Care Centre Cervera, Gerència d'Atenció Primària, Institut Català de la Salut; Biomedical Research Institute of Lleida &amp; University of Lleida</p> <p>Vilanova, Maria; Primary Health Care Centre Igualada Nord, Gerència d'Atenció Primària, Institut Català de la Salut; Biomedical Research Institute of Lleida &amp; University of Lleida</p> <p>Alcubierre, Nuria; Department of Nutrition and Dietetics, Avantmedic Granado-Casas, Minerva ; Biomedical Research Institute of Lleida &amp; University of Lleida; Health Sciences Research Institute &amp; University Hospital Germans Trias I Pujol</p> <p>Marsal, Josep Ramón; Unitat de Suport a la Recerca Lleida, Fundació Institut Universitari per a la Recerca a l'Atenció Primària de Salut Jordi Gol i Gurina (IDIAPJGol), &amp; CIBER of Epidemiology and Public Health (CIBERESP); Epidemiology Unit of the Cardiovascular Service, Hospital Universitari Vall d'Hebron</p> <p>Miró, Neus; Primary Health Care Centre Tàrrrega, Gerència d'Atenció Primària, Institut Català de la Salut</p> <p>Cebrian, Cristina; Primary Health Care Centre Mollerussa, Gerència d'Atenció Primària, Institut Català de la Salut</p> <p>Molló, Àngels; Primary Health Care Centre Guissona, Gerència d'Atenció Primària, Institut Català de la Salut</p> <p>Franch-Nadal, Josep; DAP-Cat Group, Unitat de Suport a la Recerca Barcelona, Fundació Institut Universitari per a la Recerca a l'Atenció Primària de Salut Jordi Gol i Gurina (IDIAPJGol), &amp; CIBER on Diabetes and Associated Metabolic Diseases (CIBERDEM); Primary Health Care Centre Raval Sud, Gerència d'Atenció Primària, Institut Català de la Salut</p> <p>Mata-Cases, Manel; DAP-Cat Group, Unitat de Suport a la Recerca Barcelona, Fundació Institut Universitari per a la Recerca a l'Atenció Primària de Salut Jordi Gol i Gurina (IDIAPJGol), &amp; CIBER on Diabetes and Associated Metabolic Diseases (CIBERDEM); Primary Health Care Centre La Mina, Gerència d'Atenció Primària Barcelona, Institut Català de la Salut</p> <p>Castelblanco, Esmeralda; DAP-Cat Group, Unitat de Suport a la Recerca Barcelona, Fundació Institut Universitari per a la Recerca a l'Atenció Primària de Salut Jordi Gol i Gurina (IDIAPJGol); Department of Endocrinology &amp; Nutrition, Hospital de la Santa Creu i Sant Pau &amp; Institut d'Investigació Biomèdica Sant Pau (IIB Sant Pau), &amp; CIBER on Diabetes and Associated Metabolic Diseases (CIBERDEM)</p> <p>Mauricio, Didac ; Department of Endocrinology &amp; Nutrition, Hospital de la Santa Creu i Sant Pau &amp; Institut d'Investigació Biomèdica Sant Pau (IIB Sant Pau), &amp; CIBER on Diabetes and Associated Metabolic Diseases</p> |

1  
2  
3  
4  
5  
6  
7  
8  
9  
10  
11  
12  
13  
14  
15  
16  
17  
18  
19  
20  
21  
22  
23  
24  
25  
26  
27  
28  
29  
30  
31  
32  
33  
34  
35  
36  
37  
38  
39  
40  
41  
42  
43  
44  
45  
46  
47  
48  
49  
50  
51  
52  
53  
54  
55  
56  
57  
58  
59  
60

|           |                                                                            |
|-----------|----------------------------------------------------------------------------|
|           | (CIBERDEM); Biomedical Research Institute of Lleida & University of Lleida |
| Keywords: | Prediabetes, Undiagnosed diabetes, prediabetes prevalence                  |
|           |                                                                            |

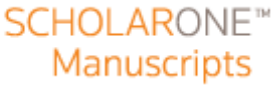

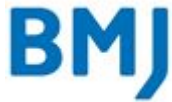

I, the Submitting Author has the right to grant and does grant on behalf of all authors of the Work (as defined in the below author licence), an exclusive licence and/or a non-exclusive licence for contributions from authors who are: i) UK Crown employees; ii) where BMJ has agreed a CC-BY licence shall apply, and/or iii) in accordance with the terms applicable for US Federal Government officers or employees acting as part of their official duties; on a worldwide, perpetual, irrevocable, royalty-free basis to BMJ Publishing Group Ltd ("BMJ") its licensees and where the relevant Journal is co-owned by BMJ to the co-owners of the Journal, to publish the Work in this journal and any other BMJ products and to exploit all rights, as set out in our [licence](#).

The Submitting Author accepts and understands that any supply made under these terms is made by BMJ to the Submitting Author unless you are acting as an employee on behalf of your employer or a postgraduate student of an affiliated institution which is paying any applicable article publishing charge ("APC") for Open Access articles. Where the Submitting Author wishes to make the Work available on an Open Access basis (and intends to pay the relevant APC), the terms of reuse of such Open Access shall be governed by a Creative Commons licence – details of these licences and which [Creative Commons](#) licence will apply to this Work are set out in our licence referred to above.

Other than as permitted in any relevant BMJ Author's Self Archiving Policies, I confirm this Work has not been accepted for publication elsewhere, is not being considered for publication elsewhere and does not duplicate material already published. I confirm all authors consent to publication of this Work and authorise the granting of this licence.

## Prevalence of prediabetes and undiagnosed diabetes in the Mollerussa cohort study

Mireia Falguera<sup>1,2</sup>, Maria Belén Vilanova<sup>2,3</sup>, Nuria Alcubierre<sup>4</sup>, Minerva Granado-Casas<sup>2,5</sup>, Josep Ramon Marsal<sup>6,7</sup>, Neus Miro<sup>8</sup>, Cristina Cebrian<sup>9</sup>, Àngels Molló<sup>10</sup>, Josep Franch-Nadal<sup>11,12</sup>, Manel Mata-Cases<sup>11,13</sup>, Esmeralda Castelblanco<sup>11,14</sup>, Didac Mauricio<sup>2,14</sup>

<sup>1</sup> Primary Health Care Centre Cervera, Gerència d'Atenció Primària, Institut Català de la Salut, Cervera, Spain

<sup>2</sup> Biomedical Research Institute of Lleida & University of Lleida, Lleida, Spain

<sup>3</sup> Primary Health Care Centre Igualada Nord, Gerència d'Atenció Primària, Institut Català de la Salut, Lleida, Spain

<sup>4</sup> Department of Nutrition and Dietetics, Avantmedic, Lleida, Spain

<sup>5</sup> Department of Endocrinology & Nutrition, Health Sciences Research Institute & University Hospital Germans Trias i Pujol, Badalona, Spain

<sup>6</sup> Unitat de Suport a la Recerca Lleida, Fundació Institut Universitari per a la Recerca a l'Atenció Primària de Salut Jordi Gol i Gurina (IDIAPJGol), & CIBER of Epidemiology and Public Health (CIBERESP), Lleida, Spain

<sup>7</sup> Epidemiology Unit of the Cardiovascular Service, Hospital Universitari Vall d'Hebron, Barcelona, Spain

<sup>8</sup> Primary Health Care Centre Tàrrrega, Gerència d'Atenció Primària, Institut Català de la Salut, Lleida, Spain

<sup>9</sup> Primary Health Care Centre Mollerussa, Gerència d'Atenció Primària, Institut Català de la Salut, Lleida, Spain

<sup>10</sup> Primary Health Care Centre Guissona, Gerència d'Atenció Primària, Institut Català de la Salut, Lleida, Spain

<sup>11</sup> DAP-Cat Group, Unitat de Suport a la Recerca Barcelona, Fundació Institut Universitari per a la Recerca a l'Atenció Primària de Salut Jordi Gol i Gurina (IDIAPJGol), & CIBER on Diabetes and Associated Metabolic Diseases (CIBERDEM), Barcelona, Spain

<sup>12</sup> Primary Health Care Centre Raval Sud, Gerència d'Atenció Primària, Institut Català de la Salut, Barcelona, Spain

<sup>13</sup> Primary Health Care Centre La Mina, Gerència d'Atenció Primària Barcelona, Institut Català de la Salut, Sant Adrià de Besòs, Spain

<sup>14</sup> Department of Endocrinology & Nutrition, Hospital de la Santa Creu i Sant Pau & Institut

1  
2 d'Investigació Biomèdica Sant Pau (IIB Sant Pau), & CIBER on Diabetes and Associated Metabolic  
3 Diseases (CIBERDEM), Barcelona, Spain  
4  
5  
6  
7  
8

9 **Corresponding authors**

10 Didac Mauricio

11 Department of Endocrinology & Nutrition; Hospital de la Santa Creu i Sant Pau

12 Sant Quintí, 89, 08041 Barcelona, Spain

13 Tel.: +34 935565661, Fax: +34 935565602

14 E-mail address: didacmauricio@gmail.com  
15  
16  
17  
18  
19  
20  
21

22 Esmeralda Castelblanco

23 Sant Pau Biomedical Research Institute

24 Sant Quintí, 77-79, 08041 Barcelona, Spain

25 Tel.: +34 935565661

26 E-mail address: esmeraldacas@gmail.com  
27  
28  
29  
30  
31  
32  
33  
34  
35  
36  
37

38 Word count: 3376 words  
39  
40  
41  
42  
43  
44  
45  
46  
47  
48  
49  
50  
51  
52  
53  
54  
55  
56  
57  
58  
59  
60

**ABSTRACT**

**Objectives:** To assess the prevalence of undiagnosed diabetes and prediabetes in the general population in the Mollerussa cohort. As a secondary objective, we aimed to identify the variables associated with these conditions and to describe the changes in glycaemic status after one year of follow-up in subjects with prediabetes.

**Design:** Prospective observational cohort study.

**Setting:** General population from a semi-rural area (Mollerussa, Spain).

**Participants:** General population  $\geq 25$  years of age without a diagnosis of diabetes.

**Results:** The prevalence of undiagnosed diabetes was 3.4% (95% confidence interval 2.65 - 4.15) and that of prediabetes was 39.3% (37.28 - 41.32). Among the 229 subjects with prediabetes, 18.3% had isolated impaired fasting plasma glucose (FPG) (FPG: 100 to  $<126$  mg/dL), 58.1% had isolated impaired HbA1c (HbA1c 5.7 -  $<6.5$ ), and 23.6% fulfilled both criteria. Follow-up data was available for 166 subjects; 41.6% (37.77 - 45.43) returned to normal glycaemic status, 57.6% (57.76 - 61.44)

1  
2 persisted in their state of prediabetes, and 0.6% (0 -1.20) progressed to diabetes. Individuals with  
3 prediabetes had worse cardiometabolic risk profiles and sociodemographic features than  
4 normoglycaemic subjects. In the logistic regression model, variables significantly associated with  
5 prediabetes (*versus* normoglycaemia) were older age (odds ratio; 95% confidence interval) (1.033;  
6 1.011-1.056), higher physical activity level (0.546; 0.360 - 0.827), body mass index (1.121; 1.029 -  
7 1.222), and a family history of diabetes (1.543; 1.025 - 2.323). The variables significantly associated  
8 with glycaemic normalization were older age (0.948; 0.916 - 0.982) and body mass index (0.779;  
9 0.651 - 0.931).

10  
11 **Conclusions:** Among adults in our region, the estimated prevalence of undiagnosed diabetes was  
12 3.4% and that of prediabetes was 39.3%. After a one-year follow-up, few subjects with prediabetes  
13 progressed to diabetes, while 41.6% returned to normoglycaemia. Individuals with prediabetes who  
14 returned to normoglycaemia were younger and had a lower body mass index.

## 15 16 17 18 19 20 21 22 23 24 25 26 **KEYWORDS**

27 Prediabetes, undiagnosed diabetes, prediabetes prevalence

## 28 29 30 31 **ARTICLE SUMMARY**

### 32 33 **Strengths and Limitations**

- 34 • This was a population-based study of a small cohort that included a representative sample  
35 of a non-previously studied population of a semi-rural area in Catalonia.
- 36 • We did not perform an oral glucose tolerance test, which is a common test in most studies  
37 but is a time-consuming and expensive procedure.
- 38 • The percentage of glucose normalization among prediabetic subjects was higher than  
39 expected compared to the percentages described in previous studies.
- 40 • The small number of cases of undiagnosed diabetes precluded further statistical analyses on  
41 this topic.
- 42
- 43
- 44
- 45
- 46
- 47
- 48
- 49
- 50
- 51
- 52

## 53 54 **BACKGROUND**

55 Diabetes mellitus, a major problem whose incidence is increasing worldwide, is a great threat to  
56 general health and is leading to increased morbidity and mortality. These effects are mainly  
57 occurring because diabetes is a disorder of glucose metabolism that affects multiple organ systems  
58 and is associated with various micro- and macro-vascular complications and several nonvascular  
59  
60

1 complications. Additionally, a large group of subjects do not fulfil the diabetes criteria but have  
2 intermediate glycaemic variables, between normal and diabetes, and are thus classified as having  
3 prediabetes. One of the most commonly used definitions of prediabetes is that of the 2010  
4 American Diabetes Association (ADA) criteria[1, 2]: (a) impaired fasting plasma glucose (IFG),  
5 defined as fasting plasma glucose (FPG) between 100 and <126 mg/dL (5.6–5.9 mmol/L); (b)  
6 impaired glucose tolerance (IGT), defined as a 2-hour plasma glucose value after a 75 g oral glucose  
7 tolerance test (OGTT) between 140 and <200 mg/dL (7.8–11.0 mmol/L); or (c) glycated haemoglobin  
8 (HbA1c) levels between 5.7% and < 6.5% (39–46 mmol/mol). Prediabetes is becoming increasingly  
9 important as it represents a high risk of developing type 2 diabetes (T2D) and cardiovascular  
10 diseases.[2, 3] Moreover, individuals with prediabetes are phenotypically quite similar to patients  
11 with T2D. That is, they tend to be older, with a higher body mass index (BMI) and higher blood  
12 pressure than people with normal glucose tolerance; in addition, they tend to have insulin  
13 resistance and dyslipidaemia.[4] Additionally, multiple risk factors, such as family history,  
14 gestational diabetes, and certain ethnicities as well as combined risk factors such as metabolic  
15 syndrome, are known to predispose subjects to a higher risk for prediabetes and its progression to  
16 T2D. Based only on impaired glucose tolerance (IGT), the worldwide prevalence of prediabetes  
17 among adults has been estimated by the International Diabetes Federation to be 7.3% in 2017, with  
18 half of these individuals (49%) being younger than 50 years.[5] The National Diabetes Statistics  
19 Report in the United States reported that the total crude prevalence of diabetes was 9.4% (30.3  
20 million, 2017 US population), with 23.8% undiagnosed and an additional 33.9% with prediabetes.[6]  
21 In Spain, according to data from the Di@bet.es study, based on OGTT, FPG and HbA1c, 13.8% of the  
22 adult population, adjusted for age and sex, had diabetes, and of these individuals up to 6% had  
23 undiagnosed diabetes. Furthermore, an additional 14.8% of individuals presented with some type  
24 of prediabetic state, 3.4% based on IFG, 9.2% based on IGT and 2.2% with disturbances in both, after  
25 adjusting for age and sex.[7, 8] According to the ADA, up to 70% of people with prediabetes will  
26 develop overt diabetes throughout their lives.[9, 10] Moreover, each year, 5-10% of subjects with  
27 prediabetes will eventually develop overt diabetes, and according to some studies, this percentage  
28 can reach up to 18% per year; however, this rate may vary with the definition of prediabetes and  
29 population characteristics.[11-14] It has been shown that over 3-5 years, approximately 25% of  
30 subjects progress to T2D, 25% return to a normal state of glucose tolerance and 50% remain in the  
31 prediabetic state.[15] Thus, the early diagnosis and screening of prediabetes are essential steps  
32 towards the prevention of its progression or at least the delay of the onset of T2D.



1  
2 The primary aim of this study was to assess the prevalence of undiagnosed diabetes and prediabetes  
3 in the general population in the Mollerussa cohort. As a secondary objective, we aimed to assess  
4 the variables associated with these conditions and to describe the changes in glycaemic status after  
5 one year of follow-up in subjects with prediabetes.  
6  
7  
8  
9

## 10 11 **METHODS**

### 12 13 **Subjects**

14 This was a prospective population-based cohort study from a semi-rural area of Mollerussa in  
15 Catalonia (northeast Spain). The description of the cohort and the procedures performed were  
16 initially published as a cohort profile.[16] Briefly, the database of the Catalan Health Institute (ICS)  
17 through its Primary Care Electronic Clinical Station (Estació Clínica Electronica d'Atenció Primària –  
18 eCAP) was used to select the population sample. From a total population in the health-care area  
19 that included twenty-four thousand six hundred and sixty-six potentially eligible individuals, 2,226  
20 subjects were invited to participate by telephone contact, and 594 subjects aged  $\geq 25$  years were  
21 recruited.[16] The exclusion criteria included a previous diagnosis of diabetes (type 1 diabetes(T1D),  
22 T2D or any specific subtype of diabetes), treatment with oral antidiabetic drugs or the use of  
23 metformin for other conditions. In addition, subjects with cardiovascular disease (heart disease,  
24 heart failure, aortic stenosis), cancer, kidney disease, anaemia, hepatitis, gastrointestinal diseases,  
25 recent abdominal surgery, chronic pulmonary obstructive disease, chronic infectious diseases, use  
26 of systemic glucocorticoids or beta blockers or major psychiatric disorders with psychotic symptoms  
27 were excluded from the study. Subjects were considered to have hypertension or dyslipidaemia if  
28 they were using anti-hypertensive or lipid-lowering agents. Prediabetes was defined as any of the  
29 following abnormal glycaemic variables: FPG 100 to  $<126$  mg/dL or HbA1c 5.7 to  $<6.5\%$ ; diabetes  
30 was defined as FPG  $>125$  mg/dL or HbA1c  $\geq 6.5\%$ . Normal glycaemic status was defined by FPG  $<100$   
31 mg/dL and HbA1c  $<5.7$  according to the 2010 ADA criteria.[1] Eleven subjects without baseline  
32 HbA1c or FPG measurements were excluded. Subjects with prediabetes underwent a second visit  
33 12 months after the baseline visit, and 166 of them had relevant information at follow up.  
34  
35 A fasting blood sample was taken to determine glucose, HbA1c, total cholesterol, HDL-cholesterol,  
36 LDL-cholesterol, triglycerides, renal function, and other parameters following standard  
37 protocols.[16] The fatty liver index (FLI) was calculated with the equation developed by Bedogni *et*  
38 *al.* [17] Insulin resistance was calculated by the homeostatic model assessment (HOMA2-IR); beta  
39 cell function (HOMA2- $\beta$ ) and insulin sensitivity (HOMA2-S) data were calculated with a HOMA2  
40 calculator released by the Diabetes Trials Unit, University of Oxford: HOMA Calculator. This  
41  
42  
43  
44  
45  
46  
47  
48  
49  
50  
51  
52  
53  
54  
55  
56  
57  
58  
59  
60

calculator is available at: <http://www.dtu.ox.ac.uk/homacalculator/> (updated October 11, 2017).

[18] The estimated glomerular filtration rate (eGFR) was calculated with the Chronic Kidney Disease Epidemiology Collaboration equation.[19]

Sociodemographic variables were recorded, and a physical examination (weight, height, blood pressure and waist circumference) was carried out by researchers following a protocol for the inclusion of patients using a standardized baseline questionnaire for the clinical interview. Education level and physical activity were assessed according to the International Standard Classification of Education[20] and the Spanish-validated International Physical Activity Questionnaire,[21] respectively. We classified the education level as low level (studied until primary school) and high level (secondary high school education or higher). Physical activity was classified as sedentary or active (not regularly versus regularly active).

### **Ethical approval**

The study protocol was approved by the Ethics Committee of the Primary Health Care University Research Institute (IDIAP) Jordi Gol (P12/043) and was conducted following the Declaration of Helsinki. All study participants signed an informed consent form.

### **Sample size**

The sample size was determined based on an estimated prediabetes prevalence of 35.5% and 38% using HbA1c levels and the 2010 ADA criteria, respectively.[1, 22, 23] It was estimated that a random sample of 505 subjects was sufficient to assess an estimated prevalence of approximately 30% with a 95% CI and an error of  $\pm 4\%$ . [16]

### **Statistical methods**

Descriptive statistics of the mean (standard deviation) or median [interquartile range] were estimated for quantitative variables, while qualitative variables were assessed using absolute and relative frequencies. Comparisons between groups of all variables were performed to evaluate the differences. Student's t-test, ANOVA, the Mann-Whitney test, or the Kruskal-Wallis test were used to assess the differences between groups. The chi-squared test or Fisher's exact test were used to determine differences in qualitative variables. Tukey's correction was applied to account for multiple tests. Multivariate logistic regression models were used to determine the association of variables with prediabetes, isolated FPG, isolated HbA1c and both FPG and HbA1c at baseline and were performed using the enter method with covariables that were clinically or statistically associated. A backward conditional logistic regression model was used to predict the normalization of the glycaemic state; in all models, the goodness-of-fit assumption was tested by the Hosmer-Lemeshow test. The predictive accuracy of the logistic regression model for normalization was

checked by receiver-operating characteristic (ROC) curves and the area under the ROC curve ( $AUC_{ROC}$ ). Odds ratios with corresponding 95% confidence intervals are shown, and statistical significance was established as a p-value  $<0.05$ . Data management and all analyses were performed using R statistical software, version 3.3.1, and SPSS software (version 22, IBM, SPSS, Chicago, Illinois, USA).

### **Patient and Public Involvement**

This research was done without patient involvement. Patients were not invited to comment on the study design and were not consulted to develop patient relevant outcomes or interpret the results. Patients were not invited to contribute to the writing or editing of this document for readability or accuracy.

### **RESULTS**

Out of the 594 individuals recruited, complete data on FPG and HbA1c were available from 583 (98.1%). The prevalence of undiagnosed diabetes was 3.4% (95% confidence interval: 2.65-4.15), and the prevalence of prediabetes was 39.3% (37.28-41.32). Furthermore, the prevalence based on isolated FPG was 7.2%, and that based on isolated HbA1c was 22.8%, while based on the criteria of both FPG and HbA1c, the prevalence was 9.3% (Figure 1).

The clinical and sociodemographic characteristics according to glycaemic status are shown in Table 1. Except for sex, family history of diabetes, current smoking status, alcohol consumption status, triglycerides and high density lipoprotein (HDL)-cholesterol levels, there were significant differences in the majority of parameters, including age and BMI, between the three groups.

We observed a positive trend in age, BMI, waist circumference, systolic and diastolic blood pressure (SBP and DBP), alcohol consumption status, hypertension, dyslipidaemia, triglycerides, total cholesterol, low density lipoprotein (LDL)-cholesterol, insulin test, FLI, and HOMA2-IR, which were higher in individuals with prediabetes than in individuals with normoglycaemia and were higher in the diabetic group than in the prediabetic group. On the other hand, physical activity, education level, eGFR, HOMA2- $\beta$  and HOMA2-S exhibited a negative trend between the same groups. In the prediabetic group, 41.9% had impaired FPG and 81.7% had impaired HbA1c. On the other hand, among the newly identified diabetic subjects, up to 80% met the FPG criteria and 85% met the HbA1c criteria. The prevalence of prediabetes increased with increasing age, with percentages of 17.4%, 28.6%, 46.4%, 50 and 52.9% in participants aged  $<35$  years, 36-45 years, 46-55 years, 56-65

years and >65 years, respectively. Regarding BMI categories of normal weight (BMI <25 kg/m<sup>2</sup>), overweight (BMI 25-29.9 kg/m<sup>2</sup>), and obese (BMI>30 kg/m<sup>2</sup>), the prevalence of prediabetes was 29%, 45.9%, and 49%, respectively (Figure S1).

**Table 1.** Clinical and sociodemographic characteristics of the Mollerussa cohort by glycaemic status.

|                                | Normoglycaemia<br>FPG <100 mg/dL<br>and HbA1c <5.7% | Prediabetes<br>FPG 100 to 125 mg/dL,<br>or HbA1c 5.7 to 6.4% | Diabetes<br>FPG >125 mg/dL<br>or HbA1c ≥6.5% | <i>p.</i> overall | <i>p.</i> NG<br>vs PD | <i>p.</i> NG<br>vs DM | <i>p.</i> PD<br>vs DM |
|--------------------------------|-----------------------------------------------------|--------------------------------------------------------------|----------------------------------------------|-------------------|-----------------------|-----------------------|-----------------------|
| N                              | 334                                                 | 229                                                          | 20                                           | -                 | -                     | -                     | -                     |
| Sex, women                     | 193 (57.8%)                                         | 135 (59.0%)                                                  | 13 (65.0%)                                   | 0.803             | 0.85                  | 0.85                  | 0.85                  |
| Age, years                     | 45.0 [37.0;55.8]                                    | 54.0 [46.0;62.0]                                             | 62.0 [53.2;69.5]                             | <b>&lt;0.001</b>  | <b>&lt;0.001</b>      | <b>&lt;0.001</b>      | <b>0.036</b>          |
| BMI, Kg/m <sup>2</sup>         | 25.0 [22.5;27.3]                                    | 26.4 [24.8;29.7]                                             | 30.9 [26.4;35.6]                             | <b>&lt;0.001</b>  | <b>&lt;0.001</b>      | <b>&lt;0.001</b>      | <b>0.016</b>          |
| BMI categories                 |                                                     |                                                              |                                              | <b>&lt;0.001</b>  | <b>&lt;0.001</b>      | <b>&lt;0.001</b>      | <b>0.01</b>           |
| Normal weight                  | 160 (50.0%)                                         | 67 (30.2%)                                                   | 4 (20.0%)                                    |                   |                       |                       |                       |
| Overweight                     | 120 (37.5%)                                         | 106 (47.7%)                                                  | 5 (25.0%)                                    |                   |                       |                       |                       |
| Obesity                        | 40 (12.5%)                                          | 49 (22.1%)                                                   | 11 (55.0%)                                   |                   |                       |                       |                       |
| Waist, cm                      | 93.0 [84.0;100]                                     | 97.0 [89.0;104]                                              | 100 [91.0;108]                               | <b>&lt;0.001</b>  | <b>&lt;0.001</b>      | <b>0.016</b>          | 0.275                 |
| SBP, mm Hg                     | 119 [109;128]                                       | 125 [116;136]                                                | 132 [114;144]                                | <b>&lt;0.001</b>  | <b>&lt;0.001</b>      | <b>0.012</b>          | 0.248                 |
| DBP, mm Hg                     | 75.0 [69.0;82.0]                                    | 78.0 [71.0;85.0]                                             | 79.0 [72.5;86.0]                             | <b>0.005</b>      | <b>0.005</b>          | 0.281                 | 0.886                 |
| Hypertension                   | 37 (11.1%)                                          | 49 (21.4%)                                                   | 9 (45.0%)                                    | <b>&lt;0.001</b>  | <b>0.002</b>          | <b>0.001</b>          | <b>0.025</b>          |
| Dyslipidaemia                  | 27 (8.08%)                                          | 39 (17.0%)                                                   | 5 (25.0%)                                    | <b>0.001</b>      | <b>0.006</b>          | <b>0.038</b>          | 0.364                 |
| Family history DM              | 94 (29.6%)                                          | 78 (37.0%)                                                   | 8 (42.1%)                                    | 0.141             | 0.275                 | 0.553                 | 0.845                 |
| Education, high level          | 265 (82.6%)                                         | 145 (65.0%)                                                  | 11 (55.0%)                                   | <b>&lt;0.001</b>  | <b>&lt;0.001</b>      | <b>0.008</b>          | 0.514                 |
| Physical activity              | 243 (75.9%)                                         | 141 (63.2%)                                                  | 10 (50.0%)                                   | <b>0.001</b>      | <b>0.006</b>          | <b>0.031</b>          | 0.354                 |
| Current smoker                 | 82 (24.6%)                                          | 63 (27.5%)                                                   | 3 (15.0%)                                    | 0.405             | 0.49                  | 0.49                  | 0.49                  |
| Alcohol, g/day                 | 2.84 [0.00;10.6]                                    | 3.42 [0.04;15.9]                                             | 7.04 [1.42;11.5]                             | 0.303             | 0.518                 | 0.524                 | 0.71                  |
| FPG, mg/dL                     | 87.0 [82.0;92.0]                                    | 97.0 [89.0;106]                                              | 126 [110;131]                                | <b>&lt;0.001</b>  | <b>&lt;0.001</b>      | <b>&lt;0.001</b>      | <b>&lt;0.001</b>      |
| HbA1c, %                       | 5.30 [5.10;5.50]                                    | 5.80 [5.70;6.00]                                             | 6.50 [6.07;6.62]                             | <b>&lt;0.001</b>  | <b>&lt;0.001</b>      | <b>&lt;0.001</b>      | <b>&lt;0.001</b>      |
| HbA1c, mmol/mol                | 34.4 [32.2;36.6]                                    | 39.9 [38.8;42.1]                                             | 47.5 [42.9;48.9]                             | <b>&lt;0.001</b>  | <b>&lt;0.001</b>      | <b>&lt;0.001</b>      | <b>&lt;0.001</b>      |
| eGFR mL/min/1.73m <sup>2</sup> | 97.5 [87.7;106]                                     | 91.5 [78.6;102]                                              | 89.0 [68.0;101]                              | <b>&lt;0.001</b>  | <b>&lt;0.001</b>      | <b>0.02</b>           | 0.287                 |
| Triglycerides, mg/dL           | 86.0 [65.0;119]                                     | 89.0 [72.0;132]                                              | 112 [70.8;161]                               | 0.077             | 0.177                 | 0.177                 | 0.459                 |
| T-cholesterol, g/dL            | 194 [169;225]                                       | 202 [184;226]                                                | 216 [187;244]                                | <b>0.004</b>      | <b>0.013</b>          | 0.054                 | 0.234                 |
| HDL, mg/dL                     | 57.0 [48.0;68.0]                                    | 57.0 [50.0;68.0]                                             | 64.0 [49.8;78.0]                             | 0.331             | 0.849                 | 0.246                 | 0.246                 |
| LDL, mg/dL                     | 116 [95.8;140]                                      | 125 [106;146]                                                | 125 [111;150]                                | <b>0.019</b>      | <b>0.024</b>          | 0.292                 | 0.696                 |
| Insulin, µU/mL                 | 7.10 [5.30;9.70]                                    | 8.40 [6.60;11.8]                                             | 12.6 [9.25;15.6]                             | <b>&lt;0.001</b>  | <b>&lt;0.001</b>      | <b>&lt;0.001</b>      | <b>0.003</b>          |
| Fatty Liver Index              | 26.4 [10.9;53.5]                                    | 40.4 [18.9;68.2]                                             | 61.5 [37.9;92.0]                             | <b>&lt;0.001</b>  | <b>&lt;0.001</b>      | <b>0.001</b>          | <b>0.041</b>          |
| HOMA2-β                        | 100 [82.0;124]                                      | 93.3 [73.0;115]                                              | 80.2 [61.1;97.9]                             | <b>0.003</b>      | <b>0.018</b>          | <b>0.018</b>          | 0.075                 |
| HOMA2-S                        | 110 [80.1;145]                                      | 87.7 [64.4;112]                                              | 59.1 [46.0;80.9]                             | <b>&lt;0.001</b>  | <b>&lt;0.001</b>      | <b>&lt;0.001</b>      | <b>0.001</b>          |
| HOMA2-IR                       | 0.90 [0.70;1.20]                                    | 1.10 [0.90;1.60]                                             | 1.70 [1.28;2.20]                             | <b>&lt;0.001</b>  | <b>&lt;0.001</b>      | <b>&lt;0.001</b>      | <b>0.001</b>          |

Significant values are shown in bold. Median [interquartile range] and n (%). NG, normoglycaemia; PD, prediabetes; DM, diabetes; Ed level, education level; BMI, body mass index; SBP, systolic blood pressure; DBP, diastolic blood pressure; FPG, fasting plasma glucose; eGFR, estimated glomerular filtration rate; T-cholesterol, total cholesterol; HDL, high-density lipoprotein cholesterol; LDL, low-density lipoprotein cholesterol; HOMA2-IR, Homeostatic Model Assessment-2\_Insulin Resistance; HOMA2-β, Homeostatic Model Assessment-2 Beta cell function; HOMA2-S, Homeostatic Model Assessment-2 Insulin Sensitivity.

Table 2 shows the characteristics of prediabetic individuals by glycaemic state: isolated FPG, isolated HbA1c and both altered FPG and HbA1c. Thus, among the 229 subjects with prediabetes, 42 (18.3%) had abnormal isolated FPG, 133 (58.1%) had abnormal isolated HbA1c, and 54 (23.6%) had both abnormal FPG and HbA1c. Patients with both abnormal FPG and HbA1c were older; had larger waist circumferences; had increased FLI and HOMA2-IR; were more likely to be overweight or obese and have hypertension; and had lower HOMA2-S. The isolated FPG group had a higher proportion of subjects with a family history of diabetes, higher alcohol consumption, higher levels of total cholesterol and LDL-cholesterol and lower levels of HDL-cholesterol, although none of these differences were statistically significant. Finally, the isolated HbA1c group had an elevated HOMA2- $\beta$ . Although there were no statistically significant differences, the proportion of men was higher in the isolated FPG group, whereas the proportion of women was higher in the isolated HbA1c and both FPG and HbA1c groups. Among the three groups, no statistically significant differences were found regarding the following variables: sex, dyslipidaemia, family history of diabetes, education level, physical activity, current smoking status, alcohol consumption, triglycerides, total cholesterol, HDL-cholesterol or LDL-cholesterol.

**Table 2.** Clinical and sociodemographic characteristics by glycaemic status of the individuals with prediabetes.

|                        | Impaired HbA1c<br>5.7%-6.4% | Impaired FPG<br>100-125 mg/dL | HbA1c 5.7%-<br>6.4% and FPG<br>100-125 mg/dL | <i>p</i><br>overall | <i>p</i> HbA1c<br>vs. FPG | <i>p</i> HbA1c<br>vs. Both | <i>p</i> . FPG<br>vs. Both |
|------------------------|-----------------------------|-------------------------------|----------------------------------------------|---------------------|---------------------------|----------------------------|----------------------------|
| N                      | 133                         | 42                            | 54                                           | -                   | -                         | -                          | -                          |
| Sex, Women             | 84 (63.2%)                  | 19 (45.2%)                    | 32 (59.3%)                                   | 0.12                | 0.181                     | 0.74                       | 0.369                      |
| Age, years             | 53.4 (12.4)                 | 50.6 (11.8)                   | 60.6 (10.5)                                  | <b>&lt;0.001</b>    | 0.388                     | <b>0.001</b>               | <b>&lt;0.001</b>           |
| BMI, Kg/m <sup>2</sup> | 25.8 [24.5;28.9]            | 27.8 [24.5;30.6]              | 27.5 [25.6;30.5]                             | 0.056               | 0.534                     | <b>0.036</b>               | 0.534                      |
| BMI categories         |                             |                               |                                              | <b>0.018</b>        | 0.107                     | <b>0.05</b>                | <b>0.032</b>               |
| Normal weight          | 43 (33.1%)                  | 16 (41.0%)                    | 8 (15.1%)                                    |                     |                           |                            |                            |
| Overweight             | 64 (49.2%)                  | 12 (30.8%)                    | 30 (56.6%)                                   |                     |                           |                            |                            |
| Obesity                | 23 (17.7%)                  | 11 (28.2%)                    | 15 (28.3%)                                   |                     |                           |                            |                            |
| Waist, cm              | 95.0 [88.0;102]             | 98.0 [90.0;106]               | 101 [95.0;107]                               | <b>0.008</b>        | 0.232                     | <b>0.006</b>               | 0.333                      |
| SBP, mm Hg             | 124 (16.1)                  | 129 (15.5)                    | 128 (18.4)                                   | 0.169               | 0.296                     | 0.29                       | 0.991                      |
| DBP, mm Hg             | 78.0 (9.44)                 | 79.5 (12.0)                   | 77.9 (9.39)                                  | 0.674               | 0.675                     | 0.999                      | 0.723                      |
| Hypertension           | 21 (15.8%)                  | 9 (21.4%)                     | 19 (35.2%)                                   | <b>0.014</b>        | 0.542                     | <b>0.019</b>               | 0.32                       |
| Dyslipidaemia          | 25 (18.8%)                  | 4 (9.52%)                     | 10 (18.5%)                                   | 0.358               | 0.515                     | 1                          | 0.515                      |
| Family history DM      | 43 (34.1%)                  | 18 (48.6%)                    | 17 (35.4%)                                   | 0.265               | 0.471                     | 1                          | 0.471                      |
| Education, high level  | 91 (69.5%)                  | 23 (59.0%)                    | 31 (58.5%)                                   | 0.252               | 0.455                     | 0.455                      | 1                          |
| Physical activity      | 88 (67.2%)                  | 21 (53.8%)                    | 32 (60.4%)                                   | 0.281               | 0.547                     | 0.68                       | 0.68                       |
| Current smoker         | 38 (28.6%)                  | 14 (33.3%)                    | 11 (20.4%)                                   | 0.338               | 0.693                     | 0.496                      | 0.496                      |
| Alcohol, g/day         | 2.92 [0.00;15.2]            | 7.42 [0.90;16.3]              | 1.53 [0.00;17.9]                             | 0.369               | 0.336                     | 0.735                      | 0.336                      |
| FPG, mg/dL             | 89.2 (6.89)                 | 106 (4.97)                    | 109 (5.96)                                   | <b>&lt;0.001</b>    | <b>&lt;0.001</b>          | <b>&lt;0.001</b>           | 0.14                       |
| HbA1c, %               | 5.80 [5.70;6.00]            | 5.40 [5.40;5.57]              | 5.95 [5.80;6.10]                             | <b>&lt;0.001</b>    | <b>&lt;0.001</b>          | <b>&lt;0.001</b>           | <b>&lt;0.001</b>           |
| HbA1c, mmol/mol        | 39.9 [38.8;42.1]            | 35.5 [34.7;37.4]              | 41.5 [39.9;43.2]                             | <b>&lt;0.001</b>    | <b>&lt;0.001</b>          | <b>&lt;0.001</b>           | <b>&lt;0.001</b>           |

|                                 |                  |                  |                  |                  |              |                  |       |
|---------------------------------|------------------|------------------|------------------|------------------|--------------|------------------|-------|
| eGFR, mL/min/1.73m <sup>2</sup> | 93.6 [79.6;103]  | 93.2 [79.7;107]  | 89.3 [73.1;97.2] | 0.076            | 0.556        | 0.073            | 0.073 |
| Triglycerides, mg/dL            | 88.0 [72.0;134]  | 86.5 [67.0;130]  | 106 [74.5;132]   | 0.332            | 0.729        | 0.304            | 0.304 |
| Total cholesterol, mg/dL        | 205 (34.5)       | 209 (28.6)       | 203 (29.8)       | 0.689            | 0.767        | 0.947            | 0.677 |
| HDL-cholesterol, mg/dL          | 58.0 [51.0;69.0] | 52.0 [45.0;65.8] | 57.0 [51.0;66.0] | 0.128            | 0.141        | 0.755            | 0.18  |
| LDL-cholesterol, mg/dL          | 125 (32.2)       | 133 (25.5)       | 120 (23.5)       | 0.114            | 0.278        | 0.593            | 0.096 |
| Insulin, µU/mL                  | 8.00 [6.10;10.0] | 9.90 [6.90;15.9] | 10.9 [7.90;15.6] | <b>&lt;0.001</b> | <b>0.01</b>  | <b>&lt;0.001</b> | 0.577 |
| Fatty Liver Index               | 34.4 [16.9;59.2] | 42.2 [17.7;73.6] | 53.8 [32.2;73.0] | <b>0.016</b>     | 0.373        | <b>0.011</b>     | 0.378 |
| HOMA2-β                         | 96.6 [81.5;122]  | 81.7 [64.5;118]  | 82.8 [63.0;108]  | <b>0.001</b>     | <b>0.034</b> | <b>0.002</b>     | 0.693 |
| HOMA2-S                         | 98.0 [77.2;127]  | 75.0 [47.2;107]  | 67.5 [47.5;91.3] | <b>&lt;0.001</b> | <b>0.003</b> | <b>&lt;0.001</b> | 0.564 |
| HOMA2-IR                        | 1.00 [0.80;1.30] | 1.30 [0.90;2.15] | 1.50 [1.10;2.10] | <b>&lt;0.001</b> | <b>0.005</b> | <b>&lt;0.001</b> | 0.545 |

Significant values are shown in bold. Median [interquartile range] and n (%). BMI, body mass index; SBP, systolic blood pressure; DBP, diastolic blood pressure; DM, diabetes; FPG, fasting plasma glucose; eGFR, estimated glomerular filtration rate; HDL, high-density lipoprotein; LDL, low-density lipoprotein; HOMA2-IR, Homeostatic Model Assessment-2\_Insulin Resistance; HOMA2-β, Homeostatic Model Assessment-2 Beta cell function; HOMA2-S, Homeostatic Model Assessment-2 Insulin Sensitivity.

### Prediabetes follow-up

Of the 229 individuals with prediabetes at baseline, 166 (72.49%) had clinical and laboratory data after 12 months of follow-up. Of them, 52 (41.6%) returned to a normal glycaemic status, 112 (57.6%) persisted in their state of prediabetes, and only 2 (0.6%) progressed to diabetes. Table 3 shows the outcome of the follow-up of the isolated FPG, HbA1c and both FPG and HbA1c groups.

**Table 3.** Outcomes at follow-up of patients with different altered glucose metabolism statuses at baseline.

| Variables      | Baseline    | N with follow-up | Follow up  |             |            |
|----------------|-------------|------------------|------------|-------------|------------|
|                |             |                  | Normalized | Persisted   | Progressed |
| Prediabetes    | 229 (39.3%) | 166 (90.7%)      | 52 (41.6%) | 112 (57.8%) | 2 (0.6%)   |
| Isolated FPG   | 42 (7.2%)   | 3 (1.8%)         | 1 (33.3%)  | 1 (33.3%)   | 1 (33.3%)  |
| Isolated HbA1c | 133 (22.8%) | 114 (68.7%)      | 47 (41.3%) | 67 (58.7%)  | 0 (0%)     |
| Both altered   | 54 (9.3%)   | 49 (29.5%)       | 4 (8.2%)   | 44 (89.8%)  | 1 (2%)     |

FPG, fasting plasma glucose

### Association of prediabetes with glycaemic status

The multivariate logistic regression model of prediabetes *versus* normoglycaemia showed that the variables associated with prediabetes were older age (odds ratio; 95% confidence interval) (1.033; 1.011-1.056), higher physical activity levels (0.546; 0.360-0.827), higher BMI (1.121; 1.029-1.222), and a family history of diabetes (1.543; 1.025-2.323) (Figure 2a). The models for isolated FPG alterations, isolated HbA1c alterations and both FPG and HbA1c alterations are shown in

Supplementary tables S1, S2 and S3, respectively. The variables associated with isolated FPG were older age (1.032; 1.008-1.057), higher physical activity levels (0.535; 0.318-0.899), and a family history of diabetes (1.798; 1.067-3.028). On the other hand, the only variable associated with impaired HbA1c was older age (1.048; 1.029-1.067). Finally, in the model for altered FPG and HbA1c, the variables associated were older age (1.056; 1.026-1.086) and high FLI (1.031; 1.002-1.061).

### Prediction of normalization

Backward conditional logistic regression, as described in the methods section, starting with the variables age, sex, waist circumference, BMI, hypertension, physical activity, family history of diabetes, education level, total cholesterol, HDL-cholesterol, FLI and HOMA2-IR, was performed to identify factors independently associated with the prediction of glycaemic status normalization. The variables that predicted glycaemic normalization were older age (0.948; 0.916-0.982) and BMI (0.779; 0.651-0.931) (Figure 2b); this model had a good predictive ability ( $AUC_{ROC}$  0.77;  $p < 0.001$ ) (Figure S2).

### DISCUSSION

We found that the prevalence of undiagnosed diabetes was 3.4%, and the prevalence of prediabetes was 39.3% in this semi-rural population in Catalonia (northeast Spain). The prevalence of prediabetes was three-fold higher based on HbA1c than that based on FPG. Subjects with prediabetes defined by both HbA1c and FPG criteria had unfavourable clinical and sociodemographic profiles related to increased cardiovascular risk. These factors were older age; abdominal obesity; higher triglycerides; increased FLI; and a higher proportion of overweight, obesity and hypertension. In our population, age was the variable most strongly associated with prediabetes based on all specific glycaemic status variables: isolated impaired FPG, isolated impaired HbA1c or both impaired FPG and HbA1c. Other variables associated with prediabetes were lower physical activity levels, a family history of diabetes, and obesity. Finally, the characteristics related to normalization at follow-up were younger age and lower BMI.

The prevalence of prediabetes and undiagnosed diabetes in our general population were within the ranges found in other population studies defining prediabetes based on the 2010 ADA criteria, using FPG and/or HbA1c. Among these studies, a large national Chinese study (with 170,287 subjects) showed a prevalence of prediabetes of 35.7% and a prevalence of undiagnosed diabetes of 6.9%.<sup>[24]</sup> In a study of the Caribbean population, the corresponding figures were 44.1% for

1  
2 prediabetes and 7.3% for undiagnosed diabetes.[25] In England, based on HbA1c levels, the  
3  
4 prediabetes prevalence was 35.5% in the adult population in 2011.[22] In these studies, the  
5  
6 prevalence of prediabetes was higher in older, overweight and obese participants.[22, 24, 25] Many  
7  
8 other studies found this relationship of age and obesity with the risk and incidence of diabetes.[26-  
9  
10 29]

11  
12  
13 In the 1999-2002 National Health and Nutrition Examination Survey (NHANES), the prevalence of  
14  
15 undiagnosed diabetes was 2.8%, and up to 26% of the participants had IFG.[30] However, the age-  
16  
17 standardized prevalence of prediabetes based on HbA1c and FPG combined was similar in the  
18  
19 periods between 1999 and 2002 and 2003 and 2006 at 29.2% and 29.3%, respectively, but increased  
20  
21 significantly to 36.2% in the period between 2007 and 2010.[31] This prevalence continued to  
22  
23 increase to as high as 38% in 2012 among adults from the USA.[23] The change in the prevalence  
24  
25 of prediabetes over time occurred because of a significant change in elevated HbA1c, whereas the  
26  
27 prevalence based on elevated FPG was similar over this period.[31] Thus, in our population, as in  
28  
29 the NHANES study, HbA1c was the most significant contributor to prediabetes prevalence, followed  
30  
31 by FPG, which is in concordance with the findings in the Caribbean population[25] and discordant  
32  
33 with the reports from the NHANES study between 2011 and 2014 in which they reported that FPG  
34  
35 was the most significant contributor to prediabetes prevalence followed by HbA1c.[32] Our results  
36  
37 show that individuals with isolated impaired HbA1c when diagnosed with prediabetes might have a  
38  
39 slightly better cardiometabolic risk profile than those with isolated FPG, while those individuals with  
40  
41 both impaired FPG and HbA1c had the worst CV risk. These results are in line with the findings of  
42  
43 the prospective observational study in the primary care setting of a Spanish cohort with prediabetes  
44  
45 (PREDAPS) of our group.[33, 34]

46  
47 Additionally, two meta-analyses found that among individuals with prediabetes based on the ADA  
48  
49 criteria, all-cause and CVD mortality were increased[35] and that the risk of cardiovascular disease  
50  
51 increased independently of the glucose assessment in comparison to the risk of normoglycaemic  
52  
53 subjects.[36] Moreover, a recent study concluded that those who returned to normoglycaemia from  
54  
55 FPG- or HbA1c-defined prediabetes were not at reduced risk of future CVD or death.[37] Studies of  
56  
57 shorter duration, over 3-5 years, have shown that approximately 25% of subjects progress to  
58  
59 diabetes, 25% return to a normal state of glucose tolerance and 50% remain in the prediabetic  
60  
61 state;[15] after 1 year, 18.8% of subjects with prediabetes returned to normoglycaemia and  
62  
63 approximately 30% with abnormal FPG, 29.1% with abnormal HbA1c and 7.6% with abnormalities



1  
2 in both FPG and HbA1c returned to a normal state of glucose tolerance.[38] In our findings from a  
3  
4 one-year follow-up, the rate of reversion from prediabetes to normoglycaemia was approximately  
5  
6 40%, and approximately 60% of participants remained in the prediabetic state. On the other hand,  
7  
8 lifestyle modifications, such as weight loss and increased physical activity, among other factors  
9  
10 associated with prediabetes, reduced the risk of diabetes among these subjects.[12, 39] According  
11  
12 to these reports, in our study, lower BMI was a factor that was independently associated with the  
13  
14 normalization of the glycaemic state, and an active lifestyle decreased the risk of having  
15  
16 prediabetes.

17 The results of this study need to be interpreted in light of its strengths and weaknesses. First, we  
18  
19 included a small number of participants in comparison to the sample sizes of other studies.  
20  
21 However, the Mollerussa cohort is a representative sample of the region, which is a specific semi-  
22  
23 rural area that has never been specifically investigated. Second, we did not assess glucose tolerance  
24  
25 through an oral glucose tolerance test, which is common in most population studies. Although this  
26  
27 assay is sensitive, it is also less specific for identifying subjects who could develop diabetes.[40]  
28  
29 Furthermore, the oral glucose tolerance test has a low reproducibility and is a rather time-  
30  
31 consuming and expensive procedure.[8, 41] Conversely, HbA1c and FPG are cost-effective and more  
32  
33 convenient for patients. Currently, FPG is an accepted screening method to detect diabetes and  
34  
35 prediabetes. HbA1c improves the sensitivity of FPG in the detection of early T2D in high-risk  
36  
37 subjects[30, 42] and is a better predictor of CV events than FPG.[43] Third, although traditional  
38  
39 factors such as hypertension, dyslipidaemia and obesity were included in the analysis models, the  
40  
41 existence of unmeasured confounding variables cannot be entirely ruled out. Finally, it is probable  
42  
43 that the use of the World Health Organization prediabetes criteria in our study would have resulted  
44  
45 in a smaller proportion of subjects who returned to a normal glycaemic state. The World Health  
46  
47 Organization established a normal concentration of FPG between 110 and <126 mg/dl.[44]

## 48 **Conclusions**

49 For the first time, our study provides information on the prevalence of diabetes and prediabetes in  
50  
51 the Mollerussa health care area, a Mediterranean semi-rural area in northeast Spain. Individuals  
52  
53 with prediabetes had a more unfavourable cardiometabolic risk profile than normoglycaemic  
54  
55 subjects. Moreover, individuals with abnormalities in both criteria used to diagnose prediabetes had  
56  
57 the worst risk profile. Finally, after one year of follow-up, few people progressed to diabetes, while  
58  
59 more than 40% returned to a normal glycaemic state, and nearly 60% persisted in the prediabetic  
60  
61 state. These results suggest that the use of both FPG and HbA1c criteria in clinical practice could

1  
2 help identify people with high diabetes and cardiovascular risk. Moreover, the identification of  
3 individuals with prediabetes provides an opportunity for intervention through lifestyle modification  
4 and pharmacological treatments not only to reduce the development of diabetes but also to prevent  
5 the development of chronic complications.  
6  
7  
8  
9

10  
11 **Acknowledgements** The authors thank Jordi Real for their valuable assistance in conducting the  
12 statistical analysis. CIBER of Diabetes and Associated Metabolic Diseases is an initiative from  
13 Instituto de Salud Carlos III (Plan Nacional de I+D+I and Fondo Europeo de Desarrollo Regional).  
14

15  
16 **Author Contributions** MF, EC and DM conceived and designed the study; MBV, JFN, and MMC  
17 participated in the study design; MBV, MF, NA, MGC, NM and CC collected the data; EC and JRM  
18 performed the statistical analyses; MF, EC, MMC and DM wrote the manuscript. All authors critically  
19 reviewed the manuscript and approved the final version to be published.  
20  
21  
22

23  
24 **Funding** This study was funded by Institut Universitari d'Investigació en Atenció Primària Jordi Gol  
25 (IDIAP Jordi Gol).  
26

27 **Competing interests** None declared.  
28

29 **Ethics approval** The project was approved by the Ethics Committee of the Primary Health Care  
30 University Research Institute (IDIAP) Jordi Gol (PI12/043) Barcelona, Spain.  
31

32  
33 **Data sharing statement** Readers may contact Dr Didac Mauricio (didacmauricio@gmail.com)  
34 regarding the data.  
35

36 **Patient consent for publication** Not required.  
37

38 **The original protocol for the study** Readers may find the Cohort description as a Supplementary  
39 file 3.  
40  
41  
42  
43  
44  
45

## 46 **References**

- 47 1. Olson DE, Rhee MK, Herrick K, et al. Screening for diabetes and pre-diabetes with proposed  
48 A1C-based diagnostic criteria. *Diabetes Care* 2010;33:2184-2189. doi:10.2337/dc10-0433  
49
- 50 2. American Diabetes Association. 2. Classification and Diagnosis of Diabetes. *Diabetes Care*  
51 2016;40:S11-S24. doi:10.2337/dc17-S005  
52
- 53 3. Brannick B, Wynn A, Dagogo-Jack S. Prediabetes as a toxic environment for the initiation of  
54 microvascular and macrovascular complications. *Exp Biol Med* 2016;241:1323-1331.  
55 doi:10.1177/1535370216654227  
56  
57  
58  
59  
60

- 1
- 2 4. Ferrannini E. Definition of intervention points in prediabetes. *Lancet Diabetes Endocrinol*
- 3 2014;8:1-9. doi:10.1016/S2213-8587(13)70175-X
- 4
- 5 5. International Diabetes Federation Diabetes Atlas. 8th ed, 2017.
- 6 http://www.diabetesatlas.org/ (accessed June 2019)
- 7
- 8
- 9 6. Centers for Disease Control and Prevention. National Diabetes Statistics Report, 2017.
- 10 Atlanta, GA: Centers for Disease Control and Prevention, U.S. Dept of Health and Human
- 11 Services; 2017. https://www.cdc.gov/diabetes/data/statistics/statistics-report.html
- 12 (accessed June 2019)
- 13
- 14
- 15
- 16 7. Soriguer F, Goday A, Bosch-Comas A, *et al.* Prevalence of diabetes mellitus and impaired
- 17 glucose regulation in Spain: the Di@bet.es Study. *Diabetologia* 2012;55:88-93.
- 18 doi:10.1007/s00125-011-2336-9
- 19
- 20
- 21
- 22 8. Mata-Cases M, Artola S, Escalada J, *et al.* Consenso sobre la detección y el manejo de la
- 23 prediabetes. Grupo de Trabajo de Consensos y Guías Clínicas de la Sociedad Española de
- 24 Diabetes. *Endocrinol Nutr* 2015;1-14. doi:10.1016/j.endonu.2014.10.008
- 25
- 26
- 27 9. Nathan DM, Davidson MB, DeFronzo RA, *et al.* Impaired Fasting Glucose and Impaired
- 28 Glucose Tolerance: Implications for care. *Diabetes Care* 2007;30:753-759. doi:10.2337/dc07-
- 29 9920
- 30
- 31
- 32
- 33 10. Tabak AG, Herder C, Rathmann W, *et al.* Prediabetes: a high-risk state for diabetes
- 34 development. *Lancet* 2012;379:2279-2290. doi:10.1016/S0140-6736(12)60283-9
- 35
- 36
- 37 11. Tuomilehto J, Lindström J, Eriksson JG, *et al.* Prevention of type 2 diabetes mellitus by
- 38 changes in lifestyle among subjects with impaired glucose tolerance. *N Engl J Med*
- 39 2001;344:1343-1350. doi:10.1056/NEJM200105033441801
- 40
- 41
- 42 12. Knowler WC, Barrett-Connor E, Fowler S, *et al.* Reduction in the Incidence of Type 2 Diabetes
- 43 with Lifestyle Intervention or Metformin. *N Engl J Med* 2002;346:393-403.
- 44 doi:10.1056/NEJMoa012512
- 45
- 46
- 47 13. Ramachandran A, Snehalatha C, Mary S, *et al.* The Indian Diabetes Prevention Programme
- 48 shows that lifestyle modification and metformin prevent type 2 diabetes in Asian Indian
- 49 subjects with impaired glucose tolerance (IDPP-1). *Diabetologia* 2006;49:289-297.
- 50 doi:10.1007/s00125-005-0097-z
- 51
- 52
- 53
- 54
- 55 14. Gerstein HC, Santaguida P, Raina P, *et al.* Annual incidence and relative risk of diabetes in
- 56 people with various categories of dysglycemia: A systematic overview and meta-analysis of
- 57 prospective studies. *Diabetes Res Clin Pract* 2007;78(3):305-312.
- 58 doi:10.1016/j.diabres.2007.05.004.
- 59
- 60

15. Paulweber B, Valensi P, Lindström J, et al. A European evidence-based guideline for the prevention of type 2 diabetes. *Horm Metab Res* 2010;42:S3-S36. doi:10.1055/s-0029-1240928
16. Vilanova MB, Falguera M, Marsal JR, et al. Prevalence, clinical features and risk assessment of pre-diabetes in Spain: the prospective Mollerussa cohort study. *BMJ Open* 2017;1-8. doi:10.1136/bmjopen-2016-015158
17. Bedogni G, Bellentani S, Miglioli L, et al. The Fatty Liver Index: a simple and accurate predictor of hepatic steatosis in the general population. *BMC Gastroenterol* 2006;6:44-47. doi:10.1186/1471-230X-6-33
18. Levy JC, Matthews DR, Hermans MP. Correct Homeostasis Model Assessment (HOMA) Evaluation Uses the Computer Program. *Diabetes Care* 1998;21:2191-2. doi:10.2337/diacare.21.12.2191
19. Levey AS, Levey, Stevens LA, et al. A new equation to estimate glomerular filtration rate. *Ann Intern Med* 2009;150:604-612. doi:10.7326/0003-4819-150-9-200905050-00006
20. OECD/Eurostat/UNESCO Institute for Statistics. ISCED 2011 Operational Manual: guidelines for Classifying National Education Programmes and Related Qualifications. Paris: OECD Publishing, 2015
21. Roman-Viñas B, Serra-Majem L, Hagströmer M, et al. International Physical Activity Questionnaire: Reliability and validity in a Spanish population. *Eur J Sport Sci* 2010;10:297-304. doi:10.1080/17461390903426667
22. Mainous AG III, Tanner RJ, Baker R, et al. Prevalence of prediabetes in England from 2003 to 2011: population-based, cross-sectional study. *BMJ Open* 2014;4:1-8. doi:10.1136/bmjopen-2014-005002
23. Menke A, Casagrande S, Geiss L, Cowie CC. Prevalence of and Trends in Diabetes Among Adults in the United States, 1988-2012. *JAMA* 2015;314:1021-1029. doi:10.1001/jama.2015.10029
24. Wang L, Gao P, Zhang M, et al. Prevalence and Ethnic Pattern of Diabetes and Prediabetes in China in 2013. *JAMA* 2017;317:2515-2516. doi:10.1001/jama.2017.7596
25. Unwin N, Howitt C, Rose AM, et al. Prevalence and phenotype of diabetes and prediabetes using fasting glucose vs HbA1c in a Caribbean population. *J Glob Health*. 2017;7:1-11. doi:10.7189/jogh.07.020407

- 1
  - 2
  - 3
  - 4
  - 5
  - 6
  - 7
  - 8
  - 9
  - 10
  - 11
  - 12
  - 13
  - 14
  - 15
  - 16
  - 17
  - 18
  - 19
  - 20
  - 21
  - 22
  - 23
  - 24
  - 25
  - 26
  - 27
  - 28
  - 29
  - 30
  - 31
  - 32
  - 33
  - 34
  - 35
  - 36
  - 37
  - 38
  - 39
  - 40
  - 41
  - 42
  - 43
  - 44
  - 45
  - 46
  - 47
  - 48
  - 49
  - 50
  - 51
  - 52
  - 53
  - 54
  - 55
  - 56
  - 57
  - 58
  - 59
  - 60
26. Soriguer F, Rojo-Martínez G, Almaraz MC, et al. Incidence of type 2 diabetes in southern Spain (Pizarra Study). *Eur J Clin Invest* 2008;38:126-133. doi:10.1111/j.1365-2362.2007.01910.x
27. DECODE study group. Age- and Sex-Specific Prevalences of Diabetes and Impaired Glucose Regulation in 13 European Cohorts. *Diabetes Care*. 2003;26:61-69. doi:10.2337/diacare.26.1.61
28. Edelstein SL, Knowler WC, Bain RP, et al. Predictors of progression from impaired glucose tolerance to NIDDM: an analysis of six prospective studies. *Diabetes* 1997;46:701-710. doi:10.2337/diab.46.4.701
29. Burke JP, Williams K, Gaskill SP, et al. Rapid Rise in the Incidence of Type 2 Diabetes From 1987 to 1996. *Arch Intern Med* 1999;1450-1456.
30. Cowie CC, Rust KF, Byrd-Holt DD, et al. Prevalence of Diabetes and Impaired Fasting Glucose in Adults in the U.S. Population: National Health and Nutrition Examination Survey 1999-2002. *Diabetes Care* 2006;29:1263-1268. doi:10.2337/dc06-0062
31. Bullard KM, Saydah SH, Imperatore G, et al. Secular Changes in U.S. Prediabetes Prevalence Defined by Hemoglobin A. *Diabetes Care* 2013;36:2286-2293. doi:10.2337/dc12-2563/-/DC1
32. Menke A, Casagrande S, Cowie CC. Contributions of A1c, fasting plasma glucose, and 2-hour plasma glucose to prediabetes prevalence: NHANES 2011-2014. *Ann Epidemiol* 2018;28:681-685.e682. doi:10.1016/j.annepidem.2018.07.012
33. Giráldez-García C, Sangrós FJ, Díaz-Redondo A, et al. Cardiometabolic Risk Profiles in Patients With Impaired Fasting Glucose and/or Hemoglobin A1c 5.7% to 6.4%. *Medicine* 2015;94:e1935-e1938. doi:10.1097/MD.0000000000001935.
34. Franch-Nadal J, Caballería L, Mata-Cases M, et al. Fatty liver index is a predictor of incident diabetes in patients with prediabetes: The PREDAPS study. *PLoS One* 2018;13:e0198327-17. doi:10.1371/journal.pone.0198327
35. Huang Y, Cai X, Mai W, et al. Association between prediabetes and risk of cardiovascular disease and all cause mortality: systematic review and meta-analysis. *BMJ* 2016;355:i5953. doi:10.1136/bmj.i5953
36. Levitan EB, Song Y, Ford ES, Liu S. Is Nondiabetic Hyperglycemia a Risk Factor for Cardiovascular Disease? *Arch Intern Med* 2004;2147-2155. doi:10.1001/archinte.164.19.2147

- 1  
2  
3  
4  
5  
6  
7  
8  
9  
10  
11  
12  
13  
14  
15  
16  
17  
18  
19  
20  
21  
22  
23  
24  
25  
26  
27  
28  
29  
30  
31  
32  
33  
34  
35  
36  
37  
38  
39  
40  
41  
42  
43  
44  
45  
46  
47  
48  
49
37. Vistisen D, Kivimaki M, Perreault L, et al. Reversion from prediabetes to normoglycaemia and risk of cardiovascular disease and mortality: the Whitehall II cohort study. *Diabetologia* 2019;1-6. doi:10.1007/s00125-019-4895-0
  38. Giráldez-García C, García Soidán FJ, Serrano Martín R, et al. Evolución de pacientes con prediabetes en Atención Primaria de Salud (PREDAPS): resultados del primer año de seguimiento. *Diabetes practica* 2014;5:1-48. <http://www.diabetespractica.com/public/numeros/articulo/92>
  39. Díaz-Redondo A, Giraldez-Garcia C, Carrillo L, et al. Modifiable risk factors associated with prediabetes in men and women: a cross-sectional analysis of the cohort study in primary health care on the evolution of patients with prediabetes (PREDAPS-Study). *BCM Fam Pract* 2015;1-9. doi:10.1186/s12875-014-0216-3
  40. Unwin N, Shaw J, Zimmet P, et al. Impaired glucose tolerance and impaired fasting glycaemia: the current status on definition and intervention. *Diabet Med* 2002;19:708-723.
  41. Gossain VV, Aldasouqi S. The challenge of undiagnosed pre-diabetes, diabetes and associated cardiovascular disease. *Int JDiabetes Mellit* 2010;2:43-46. doi:10.1016/j.ijdm.2009.10.004
  42. Droumaguet C, Balkau B, Simon D, et al. Use of HbA1c in predicting progression to diabetes in French men and women: data from an Epidemiological Study on the Insulin Resistance Syndrome (DESIR). *Diabetes Care* 2006;29:1619-1625. doi:10.2337/dc05-2525.
  43. Selvin E, Steffes MW, Zhu H, et al. Glycated Hemoglobin, Diabetes, and Cardiovascular Risk in Nondiabetic Adults. *N Engl J Med* 2010;362:800-811. doi:10.1056/NEJMoa0908359
  44. World Health Organization. Use of Glycated Haemoglobin (HbA1c) in the Diagnosis of Diabetes Mellitus. Ginebra: World Health Organization, 2011.

## FIGURE LEGENDS

51  
52  
53  
54  
55  
56  
57  
58  
59  
60

**Figure 1.** Flow diagram of subjects at baseline and after follow-up.

**Figure 2.** Multivariate logistic regression models **a)** model of prediabetes *versus* normoglycaemic state in the Mollerussa cohort at baseline. Significant p values are shown in bold. eGFR, estimated glomerular filtration rate. Hosmer and Lemeshow Test p=0.295. **b)** model of normalized *versus* persisted in subjects with follow-up data. Significant p values are shown in bold. Hosmer and Lemeshow Test p= 0.931.

1  
2  
3  
4  
5  
6  
7  
8  
9  
10  
11  
12  
13  
14  
15  
16  
17  
18  
19  
20  
21  
22  
23  
24  
25  
26  
27  
28  
29  
30  
31  
32  
33  
34  
35  
36  
37  
38  
39  
40  
41  
42  
43  
44  
45  
46  
47  
48  
49  
50  
51  
52  
53  
54  
55  
56  
57  
58  
59  
60

For peer review only

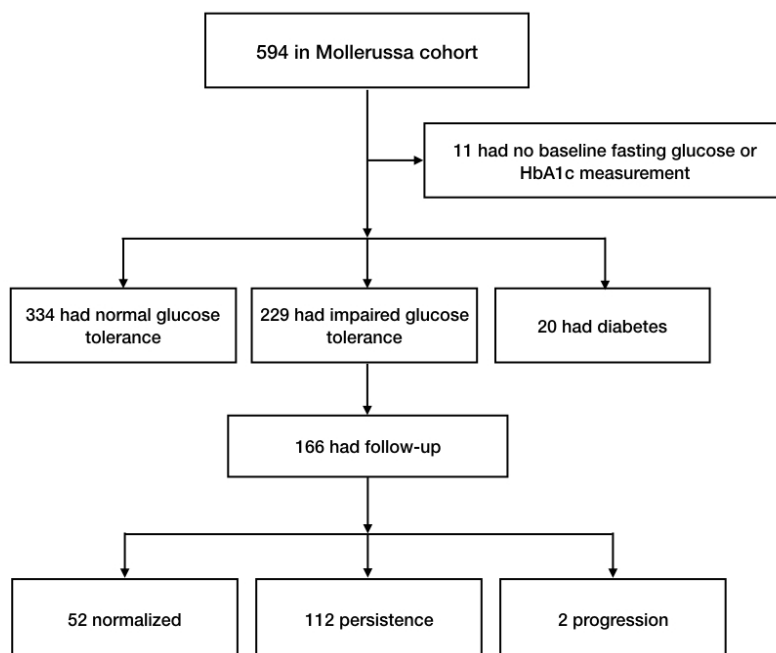

Figure 1. Flow diagram of subjects at baseline and after follow-up.

361x270mm (72 x 72 DPI)



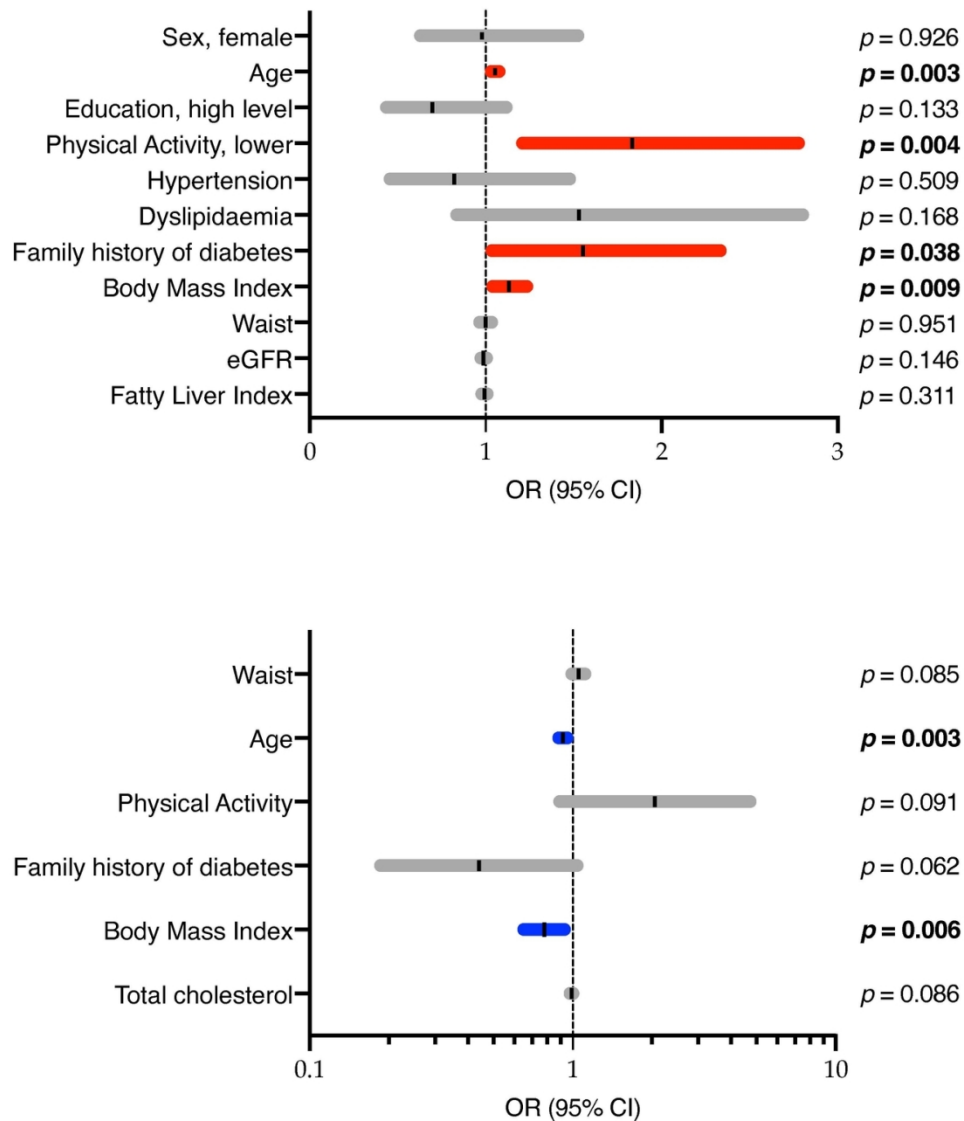

Figure 2. Multivariate logistic regression models a) model of prediabetes versus normoglycaemic state in the Mollerussa cohort at baseline. Significant p values are shown in bold. eGFR, estimated glomerular filtration rate. Hosmer and Lemeshow Test  $p=0.295$ . b) model of normalized versus persisted in subjects with follow-up data. Significant p values are shown in bold. Hosmer and Lemeshow Test  $p=0.931$ .

116x137mm (300 x 300 DPI)

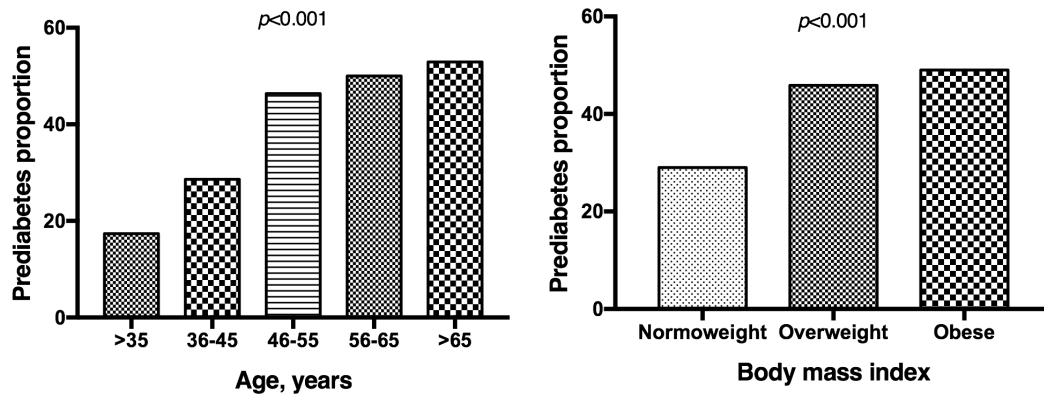

**Supplementary Figure 1.** Proportion of patients with prediabetes. A) Stratified by age.  
B) Stratified by body mass index.

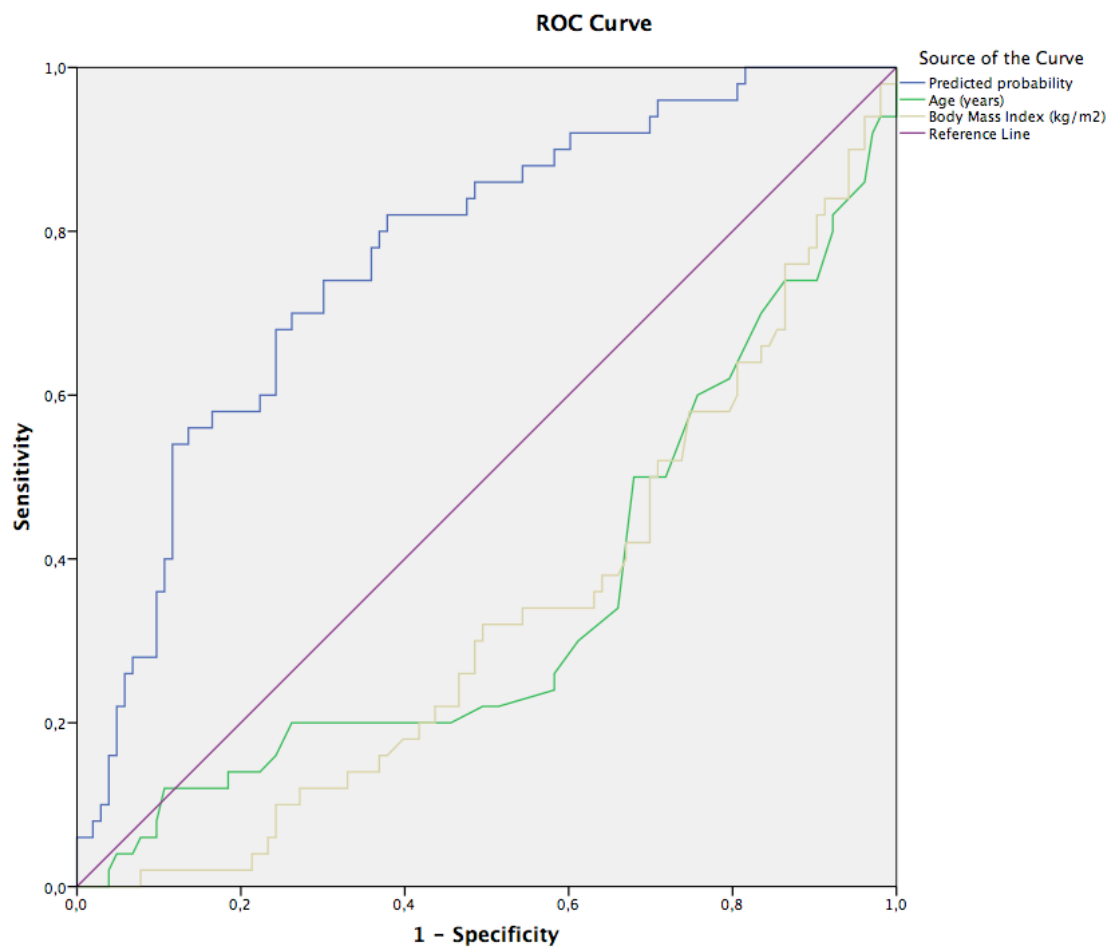

34  
35  
36  
37  
38  
39  
40  
41

| Test Result Variable(s) | Area  | Std. Error | Asymptotic Sig. | Asymptotic 95% Confidence Interval |             |
|-------------------------|-------|------------|-----------------|------------------------------------|-------------|
|                         |       |            |                 | Lower Bound                        | Upper Bound |
| Predicted probability   | 0.771 | 0.040      | 0.000           | 0.693                              | 0.849       |
| Age                     | 0.347 | 0.049      | 0.002           | 0.251                              | 0.442       |
| Body Mass Index         | 0.332 | 0.045      | 0.001           | 0.244                              | 0.421       |

42  
43  
44  
45  
46  
47  
48  
49  
50  
51  
52  
53  
54  
55  
56  
57  
58  
59  
60

**Supplementary Figure 2.** Receiver operating characteristics (ROC) curve showing the relationship between sensitivity and 1-specificity in determining the discriminatory ability of the logistic regression model and the variables age and body mass index separately.

# BMJ Open Prevalence, clinical features and risk assessment of pre-diabetes in Spain: the prospective Mollerussa cohort study

María Belén Vilanova,<sup>1</sup> Mireia Falguera,<sup>1</sup> Josep Ramon Marsal,<sup>2,3,4,5</sup> Esther Rubinat,<sup>6,7,8</sup> Núria Alcubierre,<sup>9</sup> Esmeralda Catelblanco,<sup>6,7,10</sup> Minerva Granado-Casas,<sup>6</sup> Neus Miró,<sup>11</sup> Àngels Molló,<sup>12</sup> Manel Mata-Cases,<sup>6,7,13</sup> Josep Franch-Nadal,<sup>6,7,14</sup> Didac Mauricio<sup>6,7,10</sup>

**To cite:** Vilanova MB, Falguera M, Marsal JR, *et al.* Prevalence, clinical features and risk assessment of pre-diabetes in Spain: the prospective Mollerussa cohort study. *BMJ Open* 2017;7:e015158. doi:10.1136/bmjopen-2016-015158

► Prepublication history for this paper is available online. To view these files please visit the journal online (<http://dx.doi.org/10.1136/bmjopen-2016-015158>).

Received 11 November 2016  
Revised 8 April 2017  
Accepted 2 May 2017

## ABSTRACT

**Purpose** The Mollerussa prospective cohort was created to study pre-diabetes in a population-based sample from the primary care setting in the semirural area of Pla d'Urgell in Catalonia (Spain). The aims of the study were to assess the prevalence of pre-diabetes in our population, the likelihood to develop overt diabetes over time and to identify risk factors associated with the progression of the condition.

**Participants** The cohort includes 594 subjects randomly selected between March 2011 and July 2014 from our primary care population, who were older than 25 years, consented to participate and did not have a recorded diagnosis of diabetes.

**Findings to date** At baseline, we performed a clinical interview to collect demographic, clinical and lifestyle (including a nutritional survey) characteristics; carotid ultrasound imaging to assess subclinical cardiovascular disease was also performed, and a blood sample was collected, with an overall <5% rate of missing data. An additional blood draw was performed 12 months after initial recruitment to reassess laboratory results in patients initially identified as having pre-diabetes, with an 89.6% retention rate. Several studies investigating various hypotheses are currently ongoing.

**Future plans** All subjects recruited during the cohort creation will be followed long-term through annual extraction of data from health records stored in the electronic Clinical station in Primary Care database. The Mollerussa cohort will thus be a sound population-based sample for multiple future research projects to generate insights into the epidemiology and natural history of pre-diabetes in Spain.

## INTRODUCTION

According to the American Diabetes Association (ADA), diabetes is broadly classified into four categories: type 1 diabetes mellitus (T1DM), type 2 diabetes mellitus (T2DM), gestational diabetes and specific types of diabetes due to other causes.<sup>1</sup> However, there is a group of individuals that, in spite of having higher than normal glucose levels,

## Strengths and limitations of this study

- The Mollerussa cohort contains data from subjects with pre-diabetes identified in a primary care setting that were collected prospectively during 12 months, minimising recall bias.
- There was a potential selection bias, with higher rates for women and middle-aged among enlisted subjects than among eligible but not enlisted subjects, which will be minimised through a weighting process during the analyses.
- Subjects will be followed long-term through annual extraction of data included in the individuals' electronic medical records, a design that will minimise losses to follow-up.
- The long-term follow-up will allow the accurate estimation of time trends and clinical features associated with progression from pre-diabetes to overt diabetes
- A potential limitation of the long-term follow-up is that it will rely on data that may be incomplete or inconsistently measured between subjects

do not meet criteria for diabetes, a condition referred to as pre-diabetes.

There are different definitions of pre-diabetes, but the most common one, the ADA criteria, considers one of the following instances<sup>1</sup>: (a) impaired fasting plasma glucose (IFG), defined as fasting plasma glucose (FPG) between 100 and 125 mg/dL (5.6–5.9 mmol/L); or (b) impaired glucose tolerance (IGT), defined as a 2-hour plasma glucose value after a 75g oral glucose tolerance test (OGTT) between 140 and 199 mg/dL (7.8–11.0 mmol/L); or (c) glycated haemoglobin (HbA1c) levels between 5.7% and 6.4% (39–46 mmol/mol).

The prevalence of pre-diabetes varies across countries and depending on the parameter used for the estimations. Based solely on IGT, its worldwide prevalence among adults has been estimated by the International Diabetes

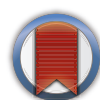

CrossMark

For numbered affiliations see end of article.

### Correspondence to

Dr Didac Mauricio;  
didacmauricio@gmail.com

Federation to be 6.7% in 2015, with half of them (50.1%) younger than 50 years.<sup>2</sup> In England, solely based on HbA1c levels, the prevalence was 35.5% among the adult population in 2011<sup>3</sup>; in Spain, isolated IFG and isolated IGT were present in 3.4% and 2.9%, respectively, and combined IFG-IGT in 2.2% of the adult population in 2010<sup>4</sup>; and in the USA, using the ADA definition (HbA1c levels or IFG or IGT) the prevalence was as high as 38% in 2012.<sup>5</sup>

Understanding the epidemiology and natural history of pre-diabetes has become a health priority, in particular at the primary care setting, because it is a source of avoidable morbidity and mortality. First, individuals with IFG and/or IGT have a clinical phenotype that resembles patients with T2DM, as they tend to be older, have a higher body mass index (BMI), have more frequent insulin resistance and dyslipidaemia and have higher arterial blood pressure (BP) than people with normal glucose tolerance.<sup>6</sup> Second, people with pre-diabetes are at increased risk of developing diabetes: according to the ADA, up to 70% of them will eventually develop overt diabetes<sup>7</sup>; the annual incidence of progression to diabetes is around 5%–10% depending on the population characteristics and the definition of pre-diabetes; 6%–9% in subjects with isolated IFG, 4%–6% in those with isolated IGT, up to 15%–19% among those with both IFG and IGT<sup>8,9</sup> and subjects with HbA1c levels from 5.7% to <6.5% have a 7.5-year predicted risk of 43.1% for incident diabetes.<sup>10</sup> Finally, individuals with pre-diabetes are at increased risk of cardiovascular disease (CVD) and premature mortality: a meta-analysis found that the risk of CVD is increased regardless of type of blood glucose assessment in comparison to subjects with normoglycaemia<sup>11</sup>; and another recent meta-analysis found that risks of all-cause and CVD mortality compared with normoglycaemic subjects were increased in individuals with pre-diabetes with ADA defined IFG, IGT or both criteria combined, although not with isolated IFG.<sup>12</sup>

Based on epidemiological and clinical evidence, it is important from a prediction and prevention perspective to target segments of the population with metabolic and cardiovascular (CV) signatures associated with an increased risk of developing diabetes and CVD.<sup>1</sup> The Mollerussa cohort was designed to identify undiagnosed diabetes or pre-diabetes in the adult primary care population from a semirural area of Catalonia (Spain), and to further obtain extensive epidemiological, clinical (including subclinical atherosclerotic disease) and lifestyle data. In the following phases, the cohort will be run as prospective observational studies involving identified at-risk individuals to determine the progress over time regarding risk factors, incident diabetes, incidence of CV events, rates of hospitalisation and global mortality.

## COHORT DESCRIPTION

Mollerussa is a prospective observational cohort study conducted in Pla d'Urgell, a semirural area of Catalonia (Spain), among subjects from the general population

with healthcare coverage from the Catalan Institute of Health (Institut Català de la Salut).

Based on an estimated prevalence of pre-diabetes in the area of Lleida of 11% (10%–19%) in 2011,<sup>13</sup> we initially calculated that we would need a representative sample of 940 adults considering a 95% CI and a margin of error of  $\pm 2\%$ . However, literature published after the initiation of the recruitment phase, using HbA1c levels and ADA criteria, reported pre-diabetes prevalence between 35.5% and 38%.<sup>3,5</sup> Using this datum, a random sample of 505 subjects was sufficient to assess an estimated prevalence of about 30% with a 95% CI and a margin of error of  $\pm 4\%$ .

## Recruitment

Using the electronic Clinical station in Primary Care (eCAP) health records database implemented in all primary care centres in Catalonia, a code number was given to each registered adult. During the recruitment phase, 24666 registered health records met inclusion criteria, namely subjects older than 25 years and attending any Primary Healthcare Centre in the same health area in Pla d'Urgell (box 1; figure 1); among them, 2226 random individuals (about 5% of the total number of individuals registered at each centre) were contacted by telephone (up to three attempts) and invited to participate (figure 1). Randomisation was carried out using a randomiser programme (SPSS software V.16.0 for Windows; SPSS), following the principles of simple random sampling.

Main exclusion criteria (box 1) included a previous diagnosis of diabetes (T1DM, T2DM and any specific subtype of diabetes), and subjects on treatment with oral antidiabetic drugs to avoid the inclusion of individuals with actual diabetes but optimal glycaemic control, or even without diabetes but using metformin as treatment for other conditions. Based on their willingness to join the study and exclusion criteria, a total of 602 subjects were recruited and subsequently invited for an appointment, of whom four withdrew consent and, for four, we did not obtain any baseline laboratory data, therefore giving a final study population of 594 subjects.

## Data collection

The research plan included a first phase involving two visits to the primary healthcare centre for baseline screening, a second phase conducted 12 months after the baseline visits and a third phase of long-term follow-up of the cohort.

### First phase or baseline screening

The following variables were collected/explored by trained research staff in the first visit to the subject's primary healthcare centre: (a) Sociodemographic variables: age; gender; education level according to the International Standard Classification of Education<sup>14</sup>; sector of working activity (primary, secondary or manufacturing, tertiary or services); self-perceived work activity (minimum, light, moderate, heavy); report on

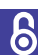

## Box 1 Summary of inclusion and exclusion criteria

### Inclusion criteria

Age  $\geq 25$  years

Attended a primary health care centre in the area

### Exclusion criteria

Patient information about having diabetes provided in the first contact or existing ICD-10 code of diabetes (E11, E14 or E13) registered by a physician or confirmed based on clinical data:

- ▶ HbA1c  $\geq 6.5\%$
- ▶ IGT: 2-hour plasma glucose in the 75g OGTT  $\geq 200$  mg/dL (11.1 mmol/L)
- ▶ IFG: FPG  $\geq 126$  mg/dL (7 mmol/L)

Specific subtypes of diabetes other than T1DM and T2DM:

- ▶ Gestational diabetes
- ▶ Genetic defect of beta-cell action
- ▶ Genetic defect in insulin action
- ▶ Diseases of the exocrine pancreas (eg, pancreatitis, haemochromatosis, pancreatic cancer, cystic fibrosis)
- ▶ Endocrinopathies (eg, Cushing's syndrome, glucagonoma, somatostatinoma, hyperthyroidism, pheochromocytoma, acromegaly)
- ▶ Chemical-induced diabetes
- ▶ Diabetes secondary to infections
- ▶ Autoimmune diabetes

Use of oral antidiabetic drugs: metformin, dipeptidyl peptidase-4 inhibitors, sulfonylureas and glitazones

Presence of cardiovascular disease:

- ▶ Previous hospitalisation to treat heart disease
- ▶ Heart failure
- ▶ Left bundle branch block or second degree atrioventricular block
- ▶ Aortic stenosis
- ▶ Systolic BP  $>180$  mm Hg or diastolic BP  $>105$  mm Hg

Cancer treated in the preceding 5 years, except non-melanoma skin cancers (basal-cell and squamous-cell carcinoma)

Kidney disease, defined as plasma creatinine  $\geq 1.4$  mg/dL in men and  $\geq 1.3$  mg/dL in women or proteinuria  $>2+$

Anaemia, defined as haematocrit  $<36\%$  in men and  $<33\%$  in women

Hepatitis, defined as transaminases more than 10 times the upper the limit of normal

Gastrointestinal diseases (pancreatitis, irritable bowel disease and inflammatory bowel disease)

Recent abdominal surgery

Chronic pulmonary obstructive disease requiring domiciliary oxygen therapy

Chronic infectious diseases (eg, HIV, active tuberculosis, HBV and HCV)

Use of systemic glucocorticoids or beta blockers

Major psychiatric disorder with psychotic symptoms

BP, blood pressure; FPG, fasting plasma glucose; HbA1c, glycated haemoglobin; HBV, hepatitis B virus; HCV, hepatitis C virus; ICD, International Classification of Diseases; IFG, impaired fasting plasma glucose; IGT, impaired glucose tolerance; OGTT, oral glucose tolerance test; T1DM, type 1 diabetes mellitus; T2DM, type 2 diabetes mellitus.

physical activity according to the Spanish-validated International Physical Activity Questionnaire<sup>15</sup>; family history of hypertension, dyslipidaemia, hypertriglyceridaemia, diabetes mellitus and acute myocardial infarction or angina pectoris; personal history of hypertension, dyslipidaemia, hypertriglyceridaemia, alcohol consumption and

smoking habit as reported by the patient; and current medication. (b) Anthropometric measures and physical examination: BP recorded according to the Joint National Committee on Prevention, Detection, Evaluation, and Treatment of High Blood Pressure guidelines<sup>16</sup>; heart rate; body weight; waist circumference; and calculation of BMI. (c) Nutritional survey: food intake was assessed using a Spanish-validated version of the semiquantitative Food Frequency Questionnaire<sup>17</sup>; and we estimated the degree of adherence to the traditional Mediterranean diet through the Mediterranean Diet score.<sup>18</sup> (d) Carotid ultrasound imaging to measure intima-medial thickness and to assess the presence of carotid atherosclerotic plaques as previously described.<sup>19</sup> Briefly, both carotids were examined following a standardised operational procedure and the Mannheim consensus,<sup>20</sup> consisting of a cross-sectional view of the common, bulb and internal segments of the carotid arteries to identify atherosclerotic plaques (defined as a focal encroachment into the lumen of the carotid), and an online average measurement of the carotid intima-media thickness (c-IMT) of these three areas, with values of c-IMT above 1.5 mm considered as plaques.<sup>21</sup>

In a second appointment, the following laboratory measurements were obtained in fasting conditions: complete blood count, lipid, liver, kidney and thyroid profile. The study of glycaemia included the measurement of FPG and HbA1c. According to the ADA HbA1c criteria,<sup>1</sup> patients were classified into three groups: (1) without glucose metabolism disorders (HbA1c  $<5.7\%$ ), (2) with pre-diabetes (HbA1c between 5.7% and 6.4%) or with undiagnosed diabetes (HbA1c  $\geq 6.5\%$ ). When the investigator detected a case of undiagnosed diabetes, the individual was re-contacted and advised to visit a general practitioner at his/her corresponding primary health-care centre.

The baseline assessment will allow a first estimation of the prevalence of pre-diabetes in our population, its associated factors, and whether these subjects also have a higher prevalence of subclinical carotid atherosclerosis (and are therefore at high risk of CVD) compared with normoglycaemic subjects. Moreover, it will build on previous estimates of the prevalence of undiagnosed diabetes in primary healthcare in Catalonia.<sup>22</sup>

### Second phase or short-term follow-up

Twelve months after the baseline visits, subjects initially fulfilling pre-diabetes criterion underwent a second visit to perform another blood draw to reassess the laboratory results. This was based on the ADA recommendation to repeat testing in the absence of unequivocal hyperglycaemia.<sup>1</sup> Based on re-evaluated HbA1c levels, those subjects with HbA1c levels between 5.7% and 6.4% were confirmed as pre-diabetes; those with a subsequent increase from pre-diabetes values at baseline to HbA1c  $\geq 6.5\%$  after 12 months were considered as incident diabetes (and as well re-contacted and advised to visit a general practitioner); and those with a further decrease

## Recruitment and baseline screening phase

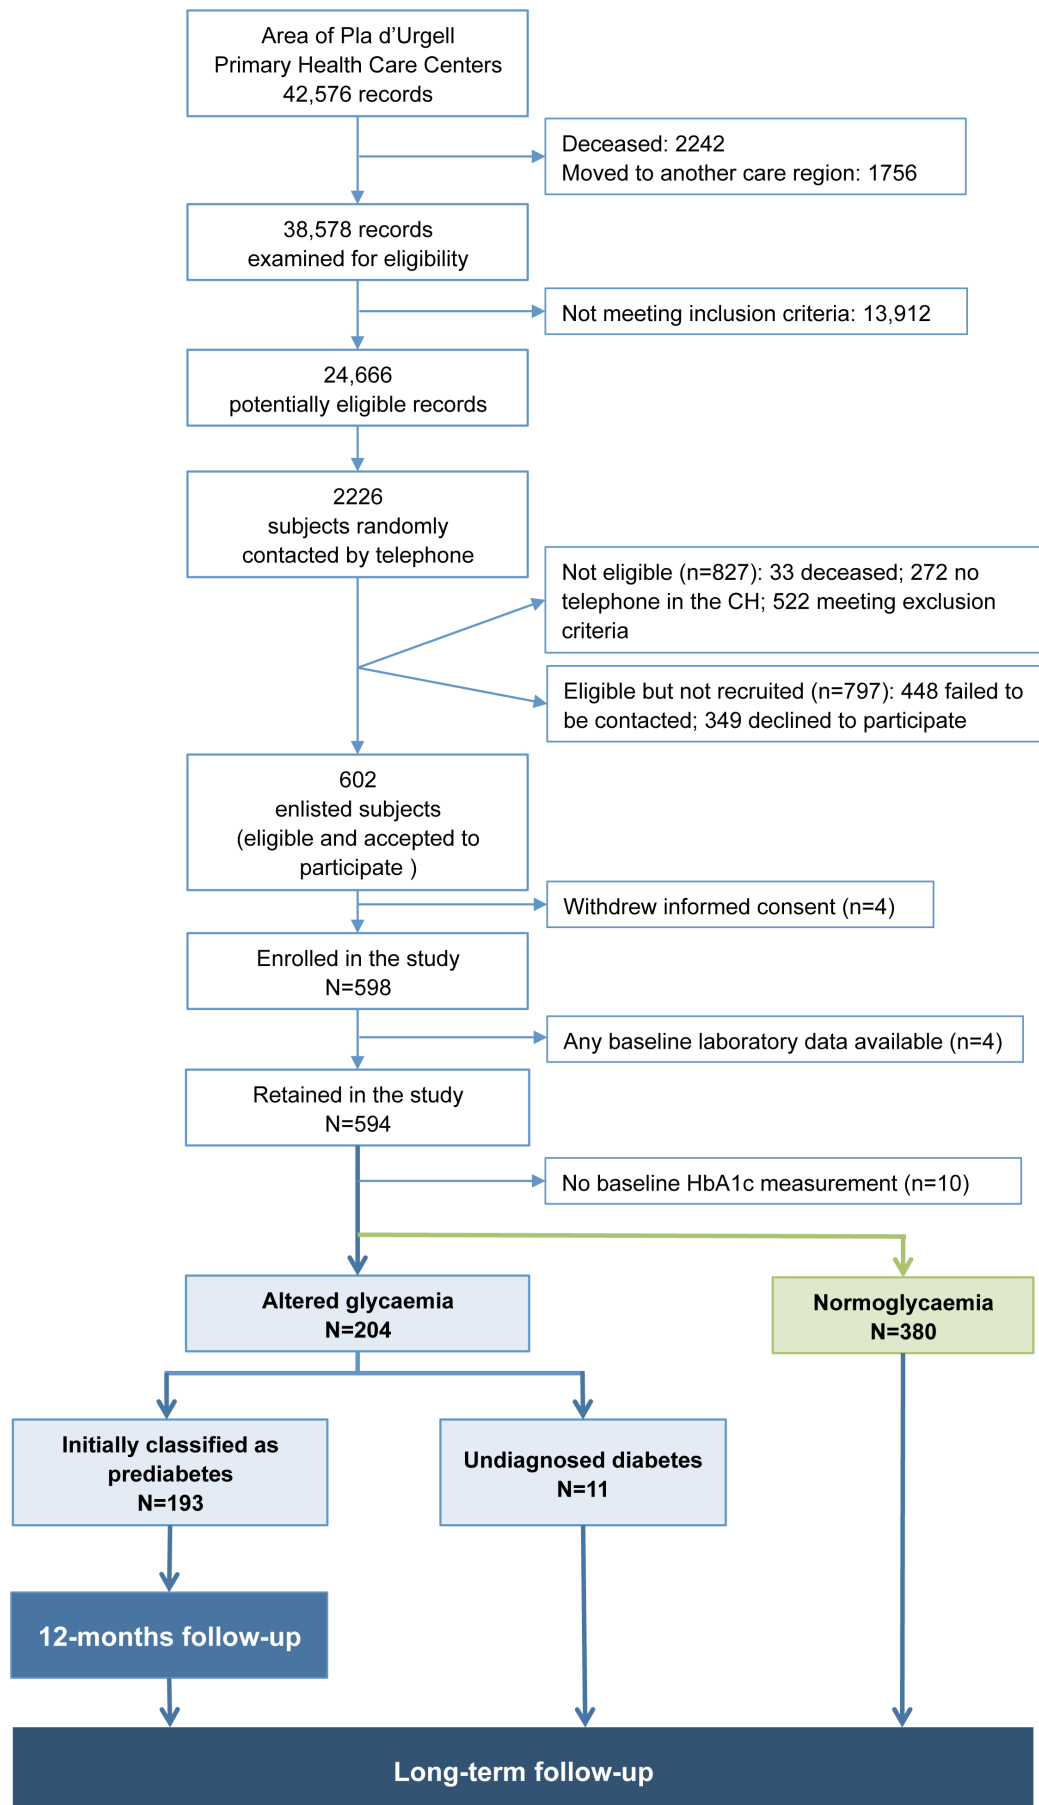

**Figure 1** Mollerussa study flow chart. CH, clinical history; HbA1c, glycated haemoglobin.

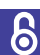

from pre-diabetes values at baseline to HbA1c <5.7% after 12 months as regression to normoglycaemia, although they will be followed up to rule out a temporary improvement, and thus a false case of regression to normal mean HbA1c values.

The 12-month follow-up will give a real estimation of pre-diabetes prevalence, valuable information on the 1-year probability of progression to diabetes and which risk factors were relevant to the further development of the disease (eg, metabolic traits and lifestyle).

### Third phase or long-term follow-up

In addition to the 12-month follow-up, we also plan to follow all subjects enrolled in the Mollerussa cohort annually through cross-sectional extraction of data stored in the primary care electronic medical records of the eCAP database.<sup>23</sup> This is based on the ADA recommendation to follow pre-diabetes in asymptomatic adults yearly.<sup>1</sup> We will extract data for the following variables: any diagnosis of T2DM (International Classification of Disease (ICD-10) codes E11 or E14)<sup>22</sup>; time since diagnosis; estimated glomerular filtration rate using the Modified Diet in Renal Disease formula; standardised HbA1c values, using the most recent value of the preceding 12 months; presence of CVD, including coronary artery disease (ICD-10 codes I20, I21, I22, I23 or I24), stroke (ICD-10 codes I63, I64, G45 or G46) and peripheral artery disease (ICD-10 code I73.9); risk factors, including BMI (most recent value in the last 12 months), cholesterol levels (total, low-density lipoproteins or LDL-cholesterol and high-density lipoproteins or HDL-cholesterol; most recent value in the last 12 months), BP (systolic and diastolic mean value in the last 12 months); and data on prescribed glucose-lowering, lipid-lowering, antihypertensive and antithrombotic medications. This information will be supplemented with data registered in the Conjunto Mínimo Básico de Datos de Altas Hospitalarias (Set of Minimum Basic Data Set of Hospital Admissions),<sup>24</sup> which records all admissions to public and private hospitals in the region and contains information on diagnostics, procedures and discharge reports.

With this additional longitudinal approach, we will be able to obtain the patient's data on progression to overt diabetes and/or initiation of antidiabetic treatment over time (if directly related to diabetes). This is important because besides the annualised incidence rate of progression to diabetes, the time course progression of dysglycaemia has not been studied at large. From the few available studies, the mode of onset of diabetes in subjects with pre-diabetes follows a non-linear pattern, with a rapid rather than gradual onset of diabetes over a 3-year time.<sup>25</sup> Moreover, we will be able to obtain data on the incidence of other diabetes-associated chronic conditions also present at the pre-diabetes stages, such as nephropathy, neuropathy or retinopathy; the incidence of macrovascular complications over time; the likelihood of initiation of hypoglycaemic agents among progressors; rates and cause of hospitalisations; and overall mortality.

This study was approved by the Ethics Committee of the Primary Healthcare University Research Institute (Institut d'Investigació en Atenció Primària, IDIAP) Jordi Gol (P12/043), and all patients signed a written informed consent form prior to participation. The study was conducted in accordance with the Declaration of Helsinki (1964).

### FINDINGS TO DATE

The Mollerussa study completed its recruitment phase between August 2011 and July 2014, and the 12-month short-term follow-up in July 2015. The enlisted sample (n=602) was different from the eligible but not enlisted population (n=784) in terms of gender and age (table 1); the enlisted sample had a significantly higher proportion of women (58.6% vs 44.0%; p<0.001), and was older (mean age 48.1 years vs 45.7 years; p<0.001).

Demographic characteristics of participants who provided a blood sample during the first phase (baseline visit) are summarised in table 2.

After the first phase, the rate of missing data was less than 5% across variables of interest (table 3), which is far below the 20% maximum recommended lost to follow-up

**Table 1** Age and gender characteristics between subjects eligible but not enlisted and subjects eventually enlisted in the Mollerussa cohort

|                                | Eligible but not enlisted         |                                    |                | Enlisted<br>(n=602) |
|--------------------------------|-----------------------------------|------------------------------------|----------------|---------------------|
|                                | Failed to be contacted<br>(n=448) | Declined to participate<br>(n=349) | All<br>(n=797) |                     |
| <b>Gender (female), n (%)</b>  | 181 (40.4)                        | 170 (48.7)                         | 351 (44.0)     | 353 (58.6)*         |
| <b>Age, years, mean (SD)</b>   | 44 (15.0)                         | 47.9 (16.3)                        | 45.7 (15.7)    | 48.1 (13.4)†        |
| <b>Age group, years, n (%)</b> |                                   |                                    |                |                     |
| <40                            | 218 (48.7)                        | 140 (40.1)                         | 358 (44.9)     | 168 (28.2)          |
| 40–60                          | 160 (35.7)                        | 125 (35.8)                         | 285 (35.8)     | 315 (52.9)          |
| >60                            | 70 (15.6)                         | 84 (24.1)                          | 154 (19.3)     | 113 (19.0)          |

\* $\chi^2$  test, p<0.001.

†Kruskal-Wallis non-parametric test, p<0.001.



**Table 2** Demographic characteristics of study population enrolled in the Mollerussa cohort

| Characteristic                                      | Total valid N | Statistic   |
|-----------------------------------------------------|---------------|-------------|
| <b>Gender, women, n (%)</b>                         | 594           | 347 (58.4)  |
| <b>Age, years, mean (SD)</b>                        | 594           | 50.6 (13.3) |
| <b>Weight, kg, mean (SD)</b>                        | 574           | 73.1 (14.5) |
| <b>Waist, cm, mean (SD)</b>                         | 573           | 94.2 (12.5) |
| <b>Body mass index, kg/m<sup>2</sup>, mean (SD)</b> | 573           | 26.3 (4.7)  |
| <25.0, n (%)                                        |               | 236 (41.2)  |
| 25.0–29.9, n (%)                                    |               | 235 (41.0)  |
| ≥30.0, n (%)                                        |               | 102 (17.8)  |
| <b>Education level, n (%)</b>                       | 575           |             |
| Not even primary school                             |               | 24 (4.2)    |
| Completed primary school                            |               | 122 (21.2)  |
| Secondary/high school                               |               | 366 (63.7)  |
| Graduate or higher                                  |               | 63 (11)     |
| <b>Work activity, n (%)</b>                         | 572           |             |
| Employed                                            |               | 393 (68.7)  |
| Unemployed                                          |               | 65 (11.4)   |
| Disability                                          |               | 12 (2.1)    |
| Retired                                             |               | 102 (17.8)  |
| <b>Hypertension, n (%)</b>                          | 571           | 102 (17.9)  |
| <b>Dyslipidaemia, n (%)</b>                         | 571           | 131 (22.9)  |
| <b>Hypertriglyceridaemia, n (%)</b>                 | 554           | 22 (4.0)    |
| <b>Smokers, n (%)</b>                               | 594           |             |
| Current                                             |               | 152 (25.6)  |
| Former                                              |               | 148 (24.9)  |
| <b>Alcohol consumption, n (%)</b>                   | 573           | 286 (49.9)  |

rate in a cohort study.<sup>26</sup> Twelve months after the baseline screening, we obtained a second blood draw from 89.6% of subjects found to have altered glycaemia levels at baseline (n=193 excluding undiagnosed diabetes), a

**Table 3** Summary of missing data for variables recorded during the first and second phase of the Mollerussa cohort

| Variable of interest                             | Missing data, n (%) |
|--------------------------------------------------|---------------------|
| <b>First phase (baseline screening); n=594</b>   |                     |
| No clinical interview                            | 17 (2.9)            |
| No nutritional survey                            | 28 (4.7)            |
| No carotid echography                            | 17 (2.9)            |
| No laboratory results                            | 0 (0.0)             |
| No HbA1c measurement                             | 10 (1.7)            |
| No sample for biobank                            | 22 (3.7)            |
| <b>Second phase (12 months follow-up); n=193</b> |                     |
| No laboratory results                            | 20 (10.4)           |

HbA1c, glycated haemoglobin.

retention rate also indicating acceptable validity of the results (table 3; figure 1).

We are currently in the phase of longitudinal follow-up of all subjects with subjects identified during the first and second phase (figure 1), and developing protocols for the analyses to explore hypotheses on different features of the epidemiology and natural history of pre-diabetes in our primary care setting. The first paper from the Mollerussa project (now in preparation) will describe results derived from the short-term follow-up of the cohort, namely the prevalence of pre-diabetes and undiagnosed diabetes, the clinical and demographic profile of patients with pre-diabetes versus those with normal glycaemic levels, a first estimation of the annual incidence of overt diabetes among subjects with pre-diabetes and the metabolic, CV and life-style disease-associated conditions.

### STRENGTHS AND LIMITATIONS

The main strength of the Mollerussa cohort is that it includes adult patients from primary care health centres prospectively collected, and the opportunity to follow participants in the long term through healthcare electronic registries, which ensures that it will be of use for multiple future research projects. The combined short-term prospective and long-term longitudinal design has both advantages and limitations.

The prospective phase (baseline screening and 12-month short-term follow-up) prevents recall bias because the risk for diabetes was assessed before the onset of the disease, and the measurement of events in a temporal sequence allows for causes to be distinguished from effects. However, we must acknowledge a potential selection bias, since we had higher rates of women and middle-aged subjects among enlisted people than among eligible but not enlisted subjects. The influence of this potential bias will be minimised through a weighting process on the prevalence estimates, although how this original unbalance may impact the results is not clear, because IFG and HbA1c detect different categories of individuals as being at risk: IFG is substantially more common among men, and its prevalence tends to plateau in middle age, while the prevalence of pre-diabetes using HbA1c increases with age (maximum peak in those aged 60–74 years) but does not differ by gender.<sup>27 28</sup> Finally, we did not perform an OGTT among enrolled individuals. Although IGT is more common than IFG in most populations, it is more sensitive but slightly less specific for identifying people who will develop diabetes.<sup>29</sup> Additionally, the OGTT has low reproducibility and it is inconvenient in terms of costs and time consumption.<sup>30</sup> Conversely, HbA1c measurement is cost-effective and improves the sensitivity of FPG in the detection of early T2DM in high-risk individuals.<sup>28 31</sup>

On the other hand, the longitudinal, long-term phase has the advantage that cohort membership is not dependent on continuing to visit the practice from which the members were recruited. While the main strength is that



1 this will minimise losses to follow-up, the primary limita-  
 2 tion is that it will rely on data that may be incomplete  
 3 or inconsistently measured between subjects. An addi-  
 4 tional advantage of this design is that, since the latency  
 5 from pre-diabetes to overt diabetes may be longer than  
 6 the initial 12 months follow-up,<sup>25</sup> the long-term follow-up  
 7 will allow a more accurate estimation of the time trends  
 8 (cumulative incidences) and clinical features associated  
 9 with progression to diabetes.

## 11 COLLABORATION

12 The Mollerussa study is open to future joint studies with  
 13 external study groups. Investigators with an interest in  
 14 hypotheses related to pre-diabetes are welcome to contact  
 15 a member of the Institut Universitari d'Investigació en  
 16 Atenció Primària Jordi Gol (IDIAP Jordi Gol) to submit  
 17 a joint study proposal to the Scientific Committee of  
 18 the institution. The group will consider these proposals  
 19 if they are in accordance with the study objectives, and  
 20 do not overlap with other studies already under way. If  
 21 accepted, a formal written agreement will be established  
 22 with the collaborative group.

### 24 Author affiliations

25 <sup>1</sup>Primary Health Care Centre Igualada Nord, Consorci Sanitari de l'Anoia, Servei  
 26 Català de la Salut, Barcelona, Spain

27 <sup>2</sup>Unitat de Suport a la Recerca, Institut Universitari d'Investigació en Atenció  
 28 Primària Jordi Gol (IDIAP Jordi Gol), Lleida, Spain

29 <sup>3</sup>Epidemiology Unit of the Cardiovascular Service, Hospital Universitari Vall  
 30 d'Hebron, Barcelona, Spain

31 <sup>4</sup>CIBER of Epidemiology and Public Health (CIBERESP), Instituto de Salud Carlos III,  
 32 Barcelona, Spain

33 <sup>5</sup>Departament de Pediatrics, Obstetriccs and Gineacology, and Preventive Mdicine,  
 34 Autonomous University of Barcelona, Bellaterra, Spain

35 <sup>6</sup>Unitat de Suport a la Recerca Barcelona Ciutat, Institut Universitari d'Investigació  
 36 en Atenció Primària Jordi Gol (IDIAP Jordi Gol), Barcelona, Spain

37 <sup>7</sup>CIBER of Diabetes and Associated Metabolic Diseases (CIBERDEM), Instituto de  
 38 Salud Carlos III, Majadahonda, Madrid, Spain

39 <sup>8</sup>Faculty of Nursing and Physiotherapy, University of Lleida, Lleida, Spain

40 <sup>9</sup>Avantmèdic, & Centre Mèdic Pla d'Urgell, Mollerussa, Lleida, Spain

41 <sup>10</sup>Department of Endocrinology and Nutrition, Health Sciences Research Institute &  
 42 University Hospital Universitari Germans Trias i Pujol, Badalona, Spain

43 <sup>11</sup>Primary Health Care Centre Tàrraga, Gerència d'Atenció Primària, Institut Català  
 44 de la Salut, Lleida, Spain

45 <sup>12</sup>Primary Health Care Center Guissona, Gerència d'Atenció Primària, Institut Català  
 46 de la Salut, Lleida, Spain

47 <sup>13</sup>Primary Health Care Center La Mina, Gerència d'Àmbit d'Atenció Primària  
 48 Barcelona Ciutat, Institut Català de la Salut, Sant Adrià de Besòs, Spain

49 <sup>14</sup>Primary Health Care Center Raval Sud, Gerència d'Atenció Primària, Institut Català  
 50 de la Salut, Barcelona, Spain

51 **Correction notice** This paper has been amended since it was published Online  
 52 First. Owing to a scripting error, some of the publisher names in the references  
 53 were replaced with 'BMJ Publishing Group'. This only affected the full text version,  
 54 not the PDF. We have since corrected these errors and the correct publishers have  
 55 been inserted into the references.

56 **Acknowledgements** We acknowledge Mònica Gratacòs and Amanda Prowse for  
 57 providing support in the manuscript preparation and editing. CIBER of Diabetes and  
 58 Associated Metabolic Diseases is an initiative from Instituto de Salud Carlos III (Plan  
 59 Nacional de I+D+I and Fondo Europeo de Desarrollo Regional).

60 **Contributors** MF, JRM and DM conceived and designed the study; MBV, JF-N, and  
 AM participated in the study design; MBV, MF, ER, NA, MG-C, NM and AM collected  
 the data; EC built and managed the database; JRM managed the database,  
 contributed to data cleaning, performed the statistical analyses and contributed

to interpretation of the data; MBV, DM, JF-N and MM-C wrote the manuscript. All  
 authors critically reviewed the manuscript and approved the final version to be  
 published.

**Funding** This study was funded by Institut Universitari d'Investigació en Atenció  
 Primària Jordi Gol (IDIAP Jordi Gol). The funding source had no role in the design  
 and conduct of the study; collection, management, analysis and interpretation of  
 the data; or preparation, review or approval of the manuscript.

**Competing interests** None declared.

**Patient consent** Obtained.

**Ethics approval** Ethics Committee of the Primary Health Care University Research  
 Institute (IDIAP) Jordi Gol (P12/043).

**Provenance and peer review** Not commissioned; externally peer reviewed.

**Data sharing statement** This article describes the establishment of a longitudinal  
 cohort and early findings, and full results will be submitted for peer-reviewed  
 publication in due course. The authors are willing to share unpublished data  
 with interested parties upon request because they contain identifying human  
 information and are unsuitable for public deposition. Requests may be made to the  
 corresponding author (didacmauricio@gmail.com).

**Open Access** This is an Open Access article distributed in accordance with the  
 Creative Commons Attribution Non Commercial (CC BY-NC 4.0) license, which  
 permits others to distribute, remix, adapt, build upon this work non-commercially,  
 and license their derivative works on different terms, provided the original work is  
 properly cited and the use is non-commercial. See: <http://creativecommons.org/licenses/by-nc/4.0/>

© Article author(s) (or their employer(s) unless otherwise stated in the text of the  
 article) 2017. All rights reserved. No commercial use is permitted unless otherwise  
 expressly granted.

## REFERENCES

1. ADA. American Diabetes Association. 2. classification and diagnosis of diabetes. *Diabetes Care* 2016;39:S13–S22.
2. IDF. International Diabetes Federation. Diabetes Atlas. 7th ed, 2015. <http://www.diabetesatlas.org/>. (accessed Sept 2016).
3. Mainous AG, Tanner RJ, Baker R, et al. Prevalence of prediabetes in England from 2003 to 2011: population-based, cross-sectional study. *BMJ Open* 2014;4:e005002.
4. Sorriquer F, Goday A, Bosch-Comas A, et al. Prevalence of diabetes mellitus and impaired glucose regulation in Spain: the Di@bet.es Study. *Diabetologia* 2012;55:88–93.
5. Menke A, Casagrande S, Geiss L, et al. Prevalence of and trends in diabetes among adults in the United States, 1988–2012. *JAMA* 2015;314:1021–9.
6. Ferrannini E. Definition of intervention points in prediabetes. *Lancet Diabetes Endocrinol* 2014;2:667–75.
7. Nathan DM, Davidson MB, DeFronzo RA, et al. Impaired fasting glucose and impaired glucose tolerance: implications for care. *Diabetes Care* 2007;30:753–9.
8. Gerstein HC, Santaguida P, Raina P, et al. Annual incidence and relative risk of diabetes in people with various categories of dysglycemia: a systematic overview and meta-analysis of prospective studies. *Diabetes Res Clin Pract* 2007;78:305–12.
9. Tabák AG, Herder C, Rathmann W, et al. Prediabetes: a high-risk state for diabetes development. *Lancet* 2012;379:2279–90.
10. Ackermann RT, Cheng YJ, Williamson DF, et al. Identifying adults at high risk for diabetes and cardiovascular disease using hemoglobin A1c National Health and Nutrition Examination Survey 2005–2006. *Am J Prev Med* 2011;40:11–17.
11. Levitan EB, Song Y, Ford ES, et al. Is nondiabetic hyperglycemia a risk factor for cardiovascular disease? A meta-analysis of prospective studies. *Arch Intern Med* 2004;164:2147–55.
12. Huang Y, Cai X, Chen P, et al. Associations of prediabetes with all-cause and cardiovascular mortality: a meta-analysis. *Ann Med* 2014;46:684–92.
13. Sánchez V. *El síndrome metabólico en Lleida desde Una perspectiva clínico-epidemiológica*. Department of Medicine, University of Lleida, 2011. Doctoral thesis. <https://repositori.udl.cat/handle/10803/31999?show=full>. (accessed 08 Oct 2016).
14. ISCED. OECD/Eurostat/UNESCO Institute for Statistics. *ISCED 2011 Operational Manual: guidelines for Classifying National Education Programmes and Related Qualifications*. Paris: OECD Publishing, 2011.

15. Roman-Viñas B, Serra-Majem L, Hagströmer M, *et al.* International physical activity questionnaire: reliability and validity in a spanish population. *Eur J Sport Sci* 2010;10:297–304.
16. Chobanian AV, Bakris GL, Black HR, *et al.* The seventh report of the joint national committee on prevention, detection, evaluation, and treatment of high blood pressure: the JNC 7 report. *JAMA* 2003;289:2560–72.
17. Vioque J. Validez de la evaluación de la ingesta dietética. In: Serra Majem L, Aranceta Bartrina J, eds. *Nutrición Y Salud Pública. Métodos, bases científicas y aplicaciones*. 2nd ed. Barcelona: Masson-Elsevier, 2006:199–220.
18. Trichopoulos A, Costacou T, Bamia C, *et al.* Adherence to a mediterranean diet and survival in a Greek population. *N Engl J Med* 2003;348:2599–608.
19. Rubinat E, Marsal JR, Vidal T, *et al.* Subclinical carotid atherosclerosis in asymptomatic subjects with type 2 diabetes mellitus. *J Cardiovasc Nurs* 2016;31:E1–E7.
20. Touboul PJ, Hennerici MG, Meairs S, *et al.* Mannheim carotid intima-media thickness consensus (2004–2006). An update on behalf of the advisory board of the 3rd and 4th watching the risk Symposium, 13th and 15th European Stroke Conferences, Mannheim, Germany, 2004, and Brussels, Belgium, 2006. *Cerebrovasc Dis* 2007;23:75–80.
21. Karim R, Hodis HN, Detrano R, *et al.* Relation of Framingham risk score to subclinical atherosclerosis evaluated across three arterial sites. *Am J Cardiol* 2008;102:825–30.
22. Mata-Cases M, Mauricio D, Real J, *et al.* Is diabetes mellitus correctly registered and classified in primary care? A population-based study in Catalonia, Spain. *Endocrinol Nutr* 2016;63:440–8.
23. Bolibar B, Fina Avilés F, Morros R, *et al.* [SIDIAP database: electronic clinical records in primary care as a source of information for epidemiologic research]. *Med Clin* 2012;138:617–21.
24. Generalitat de Catalunya Servei Català de la Salut. Registre del conjunt mínim bàsic de dades dels hospitals d'aguts (CMBD-HA). Especificacions de la validació de les dades, 2010. <http://www20.gencat.cat/>. (accessed 07 Oct 2016).
25. Nichols GA, Hillier TA, Brown JB. Progression from newly acquired impaired fasting glucose to type 2 diabetes. *Diabetes Care* 2007;30:228–33.
26. Song JW, Chung KC. Observational studies: cohort and case-control studies. *Plast Reconstr Surg* 2010;126:2234–42.
27. Mann DM, Carson AP, Shimbo D, *et al.* Impact of A1C screening criterion on the diagnosis of pre-diabetes among U.S. adults. *Diabetes Care* 2010;33:2190–5.
28. Droumaguet C, Balkau B, Simon D, *et al.* Use of HbA1c in predicting progression to diabetes in French men and women: data from an Epidemiological Study on the Insulin Resistance Syndrome (DESIR). *Diabetes Care* 2006;29:1619–25.
29. Unwin N, Shaw J, Zimmet P, *et al.* Impaired glucose tolerance and impaired fasting glycaemia: the current status on definition and intervention. *Diabet Med* 2002;19:708–23.
30. Gossain VV, Aldasouqi S. The challenge of undiagnosed pre-diabetes, diabetes and associated cardiovascular disease. *Int J Diabetes Mellit* 2010;2:43–6.
31. Perry RC, Shankar RR, Fineberg N, *et al.* HbA1c measurement improves the detection of type 2 diabetes in high-risk individuals with nondiagnostic levels of fasting plasma glucose: the Early Diabetes Intervention Program (EDIP). *Diabetes Care* 2001;24:465–71.

# Reporting checklist for cohort study.

Based on the STROBE cohort guidelines.

## Instructions to authors

Complete this checklist by entering the page numbers from your manuscript where readers will find each of the items listed below.

Your article may not currently address all the items on the checklist. Please modify your text to include the missing information. If you are certain that an item does not apply, please write "n/a" and provide a short explanation.

Upload your completed checklist as an extra file when you submit to a journal.

In your methods section, say that you used the STROBE cohort reporting guidelines, and cite them as:

von Elm E, Altman DG, Egger M, Pocock SJ, Gøtzsche PC, Vandenbroucke JP. The Strengthening of Reporting of Observational Studies in Epidemiology (STROBE) Statement: guidelines for reporting observational studies.

|                           |                     | Reporting Item                                                                                  | Page Number |
|---------------------------|---------------------|-------------------------------------------------------------------------------------------------|-------------|
| <b>Title and abstract</b> |                     |                                                                                                 |             |
| Title                     | <a href="#">#1a</a> | Indicate the study's design with a commonly used term in the title or the abstract              | 1           |
| Abstract                  | <a href="#">#1b</a> | Provide in the abstract an informative and balanced summary of what was done and what was found | 2-3         |
| <b>Introduction</b>       |                     |                                                                                                 |             |
| Background / rationale    | <a href="#">#2</a>  | Explain the scientific background and rationale for the investigation being reported            | 3-4         |
| Objectives                | <a href="#">#3</a>  | State specific objectives, including any prespecified hypotheses                                | 4           |
| <b>Methods</b>            |                     |                                                                                                 |             |

|    |                      |                      |                                                                   |     |
|----|----------------------|----------------------|-------------------------------------------------------------------|-----|
| 1  | Study design         | <a href="#">#4</a>   | Present key elements of study design early in the paper           | 4   |
| 2  |                      |                      |                                                                   |     |
| 3  | Setting              | <a href="#">#5</a>   | Describe the setting, locations, and relevant dates, including    | 4-5 |
| 4  |                      |                      | periods of recruitment, exposure, follow-up, and data collection  |     |
| 5  |                      |                      |                                                                   |     |
| 6  |                      |                      |                                                                   |     |
| 7  | Eligibility criteria | <a href="#">#6a</a>  | Give the eligibility criteria, and the sources and methods of     | 4-5 |
| 8  |                      |                      | selection of participants. Describe methods of follow-up.         |     |
| 9  |                      |                      |                                                                   |     |
| 10 |                      |                      |                                                                   |     |
| 11 | Eligibility criteria | <a href="#">#6b</a>  | For matched studies, give matching criteria and number of         | n/a |
| 12 |                      |                      | exposed and unexposed                                             |     |
| 13 |                      |                      |                                                                   |     |
| 14 |                      |                      |                                                                   |     |
| 15 | Variables            | <a href="#">#7</a>   | Clearly define all outcomes, exposures, predictors, potential     | 5   |
| 16 |                      |                      | confounders, and effect modifiers. Give diagnostic criteria, if   |     |
| 17 |                      |                      | applicable                                                        |     |
| 18 |                      |                      |                                                                   |     |
| 19 |                      |                      |                                                                   |     |
| 20 |                      |                      |                                                                   |     |
| 21 | Data sources /       | <a href="#">#8</a>   | For each variable of interest give sources of data and details of | 4-5 |
| 22 | measurement          |                      | methods of assessment (measurement). Describe                     |     |
| 23 |                      |                      | comparability of assessment methods if there is more than one     |     |
| 24 |                      |                      | group. Give information separately for for exposed and            |     |
| 25 |                      |                      | unexposed groups if applicable.                                   |     |
| 26 |                      |                      |                                                                   |     |
| 27 |                      |                      |                                                                   |     |
| 28 |                      |                      |                                                                   |     |
| 29 | Bias                 | <a href="#">#9</a>   | Describe any efforts to address potential sources of bias         | 6   |
| 30 |                      |                      |                                                                   |     |
| 31 |                      |                      |                                                                   |     |
| 32 | Study size           | <a href="#">#10</a>  | Explain how the study size was arrived at                         | 6   |
| 33 |                      |                      |                                                                   |     |
| 34 | Quantitative         | <a href="#">#11</a>  | Explain how quantitative variables were handled in the            | 6   |
| 35 | variables            |                      | analyses. If applicable, describe which groupings were chosen,    |     |
| 36 |                      |                      | and why                                                           |     |
| 37 |                      |                      |                                                                   |     |
| 38 |                      |                      |                                                                   |     |
| 39 |                      |                      |                                                                   |     |
| 40 | Statistical          | <a href="#">#12a</a> | Describe all statistical methods, including those used to control | 6   |
| 41 | methods              |                      | for confounding                                                   |     |
| 42 |                      |                      |                                                                   |     |
| 43 |                      |                      |                                                                   |     |
| 44 | Statistical          | <a href="#">#12b</a> | Describe any methods used to examine subgroups and                | 6   |
| 45 | methods              |                      | interactions                                                      |     |
| 46 |                      |                      |                                                                   |     |
| 47 |                      |                      |                                                                   |     |
| 48 | Statistical          | <a href="#">#12c</a> | Explain how missing data were addressed                           | 5   |
| 49 | methods              |                      |                                                                   |     |
| 50 |                      |                      |                                                                   |     |
| 51 |                      |                      |                                                                   |     |
| 52 | Statistical          | <a href="#">#12d</a> | If applicable, explain how loss to follow-up was addressed        | n/a |
| 53 | methods              |                      |                                                                   |     |
| 54 |                      |                      |                                                                   |     |
| 55 |                      |                      |                                                                   |     |
| 56 | Statistical          | <a href="#">#12e</a> | Describe any sensitivity analyses                                 | 6   |
| 57 | methods              |                      |                                                                   |     |
| 58 |                      |                      |                                                                   |     |
| 59 |                      |                      |                                                                   |     |
| 60 |                      |                      |                                                                   |     |

## Results

|    |                  |                      |                                                                       |
|----|------------------|----------------------|-----------------------------------------------------------------------|
| 1  |                  |                      |                                                                       |
| 2  |                  |                      |                                                                       |
| 3  |                  |                      |                                                                       |
| 4  | Participants     | <a href="#">#13a</a> | Report numbers of individuals at each stage of study—eg 6-7           |
| 5  |                  |                      | numbers potentially eligible, examined for eligibility, confirmed     |
| 6  |                  |                      | eligible, included in the study, completing follow-up, and            |
| 7  |                  |                      | analysed. Give information separately for for exposed and             |
| 8  |                  |                      | unexposed groups if applicable.                                       |
| 9  |                  |                      |                                                                       |
| 10 |                  |                      |                                                                       |
| 11 |                  |                      |                                                                       |
| 12 | Participants     | <a href="#">#13b</a> | Give reasons for non-participation at each stage n/a                  |
| 13 |                  |                      |                                                                       |
| 14 | Participants     | <a href="#">#13c</a> | Consider use of a flow diagram 7                                      |
| 15 |                  |                      |                                                                       |
| 16 |                  |                      |                                                                       |
| 17 | Descriptive data | <a href="#">#14a</a> | Give characteristics of study participants (eg demographic, 7-8       |
| 18 |                  |                      | clinical, social) and information on exposures and potential          |
| 19 |                  |                      | confounders. Give information separately for exposed and              |
| 20 |                  |                      | unexposed groups if applicable.                                       |
| 21 |                  |                      |                                                                       |
| 22 |                  |                      |                                                                       |
| 23 |                  |                      |                                                                       |
| 24 | Descriptive data | <a href="#">#14b</a> | Indicate number of participants with missing data for each 5          |
| 25 |                  |                      | variable of interest                                                  |
| 26 |                  |                      |                                                                       |
| 27 |                  |                      |                                                                       |
| 28 | Descriptive data | <a href="#">#14c</a> | Summarise follow-up time (eg, average and total amount) 5             |
| 29 |                  |                      |                                                                       |
| 30 | Outcome data     | <a href="#">#15</a>  | Report numbers of outcome events or summary measures 6-7              |
| 31 |                  |                      | over time. Give information separately for exposed and                |
| 32 |                  |                      | unexposed groups if applicable.                                       |
| 33 |                  |                      |                                                                       |
| 34 |                  |                      |                                                                       |
| 35 |                  |                      |                                                                       |
| 36 | Main results     | <a href="#">#16a</a> | Give unadjusted estimates and, if applicable, confounder- 6-7         |
| 37 |                  |                      | adjusted estimates and their precision (eg, 95% confidence            |
| 38 |                  |                      | interval). Make clear which confounders were adjusted for and         |
| 39 |                  |                      | why they were included                                                |
| 40 |                  |                      |                                                                       |
| 41 |                  |                      |                                                                       |
| 42 |                  |                      |                                                                       |
| 43 | Main results     | <a href="#">#16b</a> | Report category boundaries when continuous variables were 7           |
| 44 |                  |                      | categorized                                                           |
| 45 |                  |                      |                                                                       |
| 46 |                  |                      |                                                                       |
| 47 | Main results     | <a href="#">#16c</a> | If relevant, consider translating estimates of relative risk into n/a |
| 48 |                  |                      | absolute risk for a meaningful time period                            |
| 49 |                  |                      |                                                                       |
| 50 |                  |                      |                                                                       |
| 51 | Other analyses   | <a href="#">#17</a>  | Report other analyses done—e.g., analyses of subgroups and 7, 9,10    |
| 52 |                  |                      | interactions, and sensitivity analyses                                |
| 53 |                  |                      |                                                                       |
| 54 |                  |                      |                                                                       |

## Discussion

|    |             |                     |                                                                |
|----|-------------|---------------------|----------------------------------------------------------------|
| 55 |             |                     |                                                                |
| 56 |             |                     |                                                                |
| 57 | Key results | <a href="#">#18</a> | Summarise key results with reference to study objectives 10-11 |
| 58 |             |                     |                                                                |
| 59 |             |                     |                                                                |
| 60 |             |                     |                                                                |

|    |                    |                     |                                                                      |     |
|----|--------------------|---------------------|----------------------------------------------------------------------|-----|
| 1  | Limitations        | <a href="#">#19</a> | Discuss limitations of the study, taking into account sources of     | 12  |
| 2  |                    |                     | potential bias or imprecision. Discuss both direction and            |     |
| 3  |                    |                     | magnitude of any potential bias.                                     |     |
| 4  |                    |                     |                                                                      |     |
| 5  |                    |                     |                                                                      |     |
| 6  | Interpretation     | <a href="#">#20</a> | Give a cautious overall interpretation considering objectives,       | 13  |
| 7  |                    |                     | limitations, multiplicity of analyses, results from similar studies, |     |
| 8  |                    |                     | and other relevant evidence.                                         |     |
| 9  |                    |                     |                                                                      |     |
| 10 |                    |                     |                                                                      |     |
| 11 |                    |                     |                                                                      |     |
| 12 | Generalisability   | <a href="#">#21</a> | Discuss the generalisability (external validity) of the study        | n/a |
| 13 |                    |                     | results                                                              |     |
| 14 |                    |                     |                                                                      |     |
| 15 |                    |                     |                                                                      |     |
| 16 | <b>Other</b>       |                     |                                                                      |     |
| 17 | <b>Information</b> |                     |                                                                      |     |
| 18 |                    |                     |                                                                      |     |
| 19 |                    |                     |                                                                      |     |
| 20 | Funding            | <a href="#">#22</a> | Give the source of funding and the role of the funders for the       | 13  |
| 21 |                    |                     | present study and, if applicable, for the original study on which    |     |
| 22 |                    |                     | the present article is based                                         |     |
| 23 |                    |                     |                                                                      |     |
| 24 |                    |                     |                                                                      |     |

The STROBE checklist is distributed under the terms of the Creative Commons Attribution License CC-BY. This checklist was completed on 28. July 2019 using <https://www.goodreports.org/>, a tool made by the [EQUATOR Network](#) in collaboration with [Penelope.ai](#)

# BMJ Open

## Prevalence of prediabetes and undiagnosed diabetes in the Mollerussa prospective observational cohort study in a semi-rural area of Catalonia

|                               |                                                                                                                                                                                                                                                                                                                                                                                                                                                                                                                                                                                                                                                                                                                                                                                                                                                                                                                                                                                                                                                                                                                                                                                                                                                                                                                                                                                                                                                                                                                                                                                                                                                                                                                                                                                                                                                                                                                                                                                                                                                                                                                                                                                                                                                                                                                                                                                                                                                                                                                                                                                                                        |
|-------------------------------|------------------------------------------------------------------------------------------------------------------------------------------------------------------------------------------------------------------------------------------------------------------------------------------------------------------------------------------------------------------------------------------------------------------------------------------------------------------------------------------------------------------------------------------------------------------------------------------------------------------------------------------------------------------------------------------------------------------------------------------------------------------------------------------------------------------------------------------------------------------------------------------------------------------------------------------------------------------------------------------------------------------------------------------------------------------------------------------------------------------------------------------------------------------------------------------------------------------------------------------------------------------------------------------------------------------------------------------------------------------------------------------------------------------------------------------------------------------------------------------------------------------------------------------------------------------------------------------------------------------------------------------------------------------------------------------------------------------------------------------------------------------------------------------------------------------------------------------------------------------------------------------------------------------------------------------------------------------------------------------------------------------------------------------------------------------------------------------------------------------------------------------------------------------------------------------------------------------------------------------------------------------------------------------------------------------------------------------------------------------------------------------------------------------------------------------------------------------------------------------------------------------------------------------------------------------------------------------------------------------------|
| Journal:                      | <i>BMJ Open</i>                                                                                                                                                                                                                                                                                                                                                                                                                                                                                                                                                                                                                                                                                                                                                                                                                                                                                                                                                                                                                                                                                                                                                                                                                                                                                                                                                                                                                                                                                                                                                                                                                                                                                                                                                                                                                                                                                                                                                                                                                                                                                                                                                                                                                                                                                                                                                                                                                                                                                                                                                                                                        |
| Manuscript ID                 | bmjopen-2019-033332.R1                                                                                                                                                                                                                                                                                                                                                                                                                                                                                                                                                                                                                                                                                                                                                                                                                                                                                                                                                                                                                                                                                                                                                                                                                                                                                                                                                                                                                                                                                                                                                                                                                                                                                                                                                                                                                                                                                                                                                                                                                                                                                                                                                                                                                                                                                                                                                                                                                                                                                                                                                                                                 |
| Article Type:                 | Original research                                                                                                                                                                                                                                                                                                                                                                                                                                                                                                                                                                                                                                                                                                                                                                                                                                                                                                                                                                                                                                                                                                                                                                                                                                                                                                                                                                                                                                                                                                                                                                                                                                                                                                                                                                                                                                                                                                                                                                                                                                                                                                                                                                                                                                                                                                                                                                                                                                                                                                                                                                                                      |
| Date Submitted by the Author: | 31-Oct-2019                                                                                                                                                                                                                                                                                                                                                                                                                                                                                                                                                                                                                                                                                                                                                                                                                                                                                                                                                                                                                                                                                                                                                                                                                                                                                                                                                                                                                                                                                                                                                                                                                                                                                                                                                                                                                                                                                                                                                                                                                                                                                                                                                                                                                                                                                                                                                                                                                                                                                                                                                                                                            |
| Complete List of Authors:     | <p>Falguera, Mireia; Primary Health Care Centre Cervera, Gerència d'Atenció Primària, Institut Català de la Salut; Biomedical Research Institute of Lleida &amp; University of Lleida</p> <p>Vilanova, Maria; Primary Health Care Centre Igualada Nord, Gerència d'Atenció Primària, Institut Català de la Salut; Biomedical Research Institute of Lleida &amp; University of Lleida</p> <p>Alcubierre, Nuria; Department of Nutrition and Dietetics, Avantmedic Granado-Casas, Minerva ; Biomedical Research Institute of Lleida &amp; University of Lleida; Health Sciences Research Institute &amp; University Hospital Germans Trias I Pujol</p> <p>Marsal, Josep Ramón; Unitat de Suport a la Recerca Lleida, Fundació Institut Universitari per a la Recerca a l'Atenció Primària de Salut Jordi Gol i Gurina (IDIAPJGol), &amp; CIBER of Epidemiology and Public Health (CIBERESP); Epidemiology Unit of the Cardiovascular Service, Hospital Universitari Vall d'Hebron</p> <p>Miró, Neus; Primary Health Care Centre Tàrrrega, Gerència d'Atenció Primària, Institut Català de la Salut</p> <p>Cebrian, Cristina; Primary Health Care Centre Mollerussa, Gerència d'Atenció Primària, Institut Català de la Salut</p> <p>Molló, Àngels; Primary Health Care Centre Guissona, Gerència d'Atenció Primària, Institut Català de la Salut</p> <p>Franch-Nadal, Josep; DAP-Cat Group, Unitat de Suport a la Recerca Barcelona, Fundació Institut Universitari per a la Recerca a l'Atenció Primària de Salut Jordi Gol i Gurina (IDIAPJGol), &amp; CIBER on Diabetes and Associated Metabolic Diseases (CIBERDEM); Primary Health Care Centre Raval Sud, Gerència d'Atenció Primària, Institut Català de la Salut</p> <p>Mata-Cases, Manel; DAP-Cat Group, Unitat de Suport a la Recerca Barcelona, Fundació Institut Universitari per a la Recerca a l'Atenció Primària de Salut Jordi Gol i Gurina (IDIAPJGol), &amp; CIBER on Diabetes and Associated Metabolic Diseases (CIBERDEM); Primary Health Care Centre La Mina, Gerència d'Atenció Primària Barcelona, Institut Català de la Salut</p> <p>Castelblanco, Esmeralda; DAP-Cat Group, Unitat de Suport a la Recerca Barcelona, Fundació Institut Universitari per a la Recerca a l'Atenció Primària de Salut Jordi Gol i Gurina (IDIAPJGol); Department of Endocrinology &amp; Nutrition, Hospital de la Santa Creu i Sant Pau &amp; Institut d'Investigació Biomèdica Sant Pau (IIB Sant Pau), &amp; CIBER on Diabetes and Associated Metabolic Diseases (CIBERDEM)</p> <p>Mauricio, Didac ; Department of Endocrinology &amp; Nutrition, Hospital de</p> |



1  
2  
3  
4  
5  
6  
7  
8  
9  
10  
11  
12  
13  
14  
15  
16  
17  
18  
19  
20  
21  
22  
23  
24  
25  
26  
27  
28  
29  
30  
31  
32  
33  
34  
35  
36  
37  
38  
39  
40  
41  
42  
43  
44  
45  
46  
47  
48  
49  
50  
51  
52  
53  
54  
55  
56  
57  
58  
59  
60

|                                  |                                                                                                                                                                                                                        |
|----------------------------------|------------------------------------------------------------------------------------------------------------------------------------------------------------------------------------------------------------------------|
|                                  | la Santa Creu i Sant Pau & Institut d'Investigació Biomèdica Sant Pau (IIB Sant Pau), & CIBER on Diabetes and Associated Metabolic Diseases (CIBERDEM); Biomedical Research Institute of Lleida & University of Lleida |
| <b>Primary Subject Heading</b> : | Diabetes and endocrinology                                                                                                                                                                                             |
| Secondary Subject Heading:       | Epidemiology                                                                                                                                                                                                           |
| Keywords:                        | Prediabetes, Undiagnosed diabetes, prediabetes prevalence                                                                                                                                                              |
|                                  |                                                                                                                                                                                                                        |

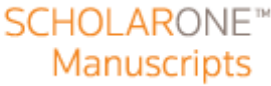



I, the Submitting Author has the right to grant and does grant on behalf of all authors of the Work (as defined in the below author licence), an exclusive licence and/or a non-exclusive licence for contributions from authors who are: i) UK Crown employees; ii) where BMJ has agreed a CC-BY licence shall apply, and/or iii) in accordance with the terms applicable for US Federal Government officers or employees acting as part of their official duties; on a worldwide, perpetual, irrevocable, royalty-free basis to BMJ Publishing Group Ltd ("BMJ") its licensees and where the relevant Journal is co-owned by BMJ to the co-owners of the Journal, to publish the Work in this journal and any other BMJ products and to exploit all rights, as set out in our [licence](#).

The Submitting Author accepts and understands that any supply made under these terms is made by BMJ to the Submitting Author unless you are acting as an employee on behalf of your employer or a postgraduate student of an affiliated institution which is paying any applicable article publishing charge ("APC") for Open Access articles. Where the Submitting Author wishes to make the Work available on an Open Access basis (and intends to pay the relevant APC), the terms of reuse of such Open Access shall be governed by a Creative Commons licence – details of these licences and which [Creative Commons](#) licence will apply to this Work are set out in our licence referred to above.

Other than as permitted in any relevant BMJ Author's Self Archiving Policies, I confirm this Work has not been accepted for publication elsewhere, is not being considered for publication elsewhere and does not duplicate material already published. I confirm all authors consent to publication of this Work and authorise the granting of this licence.

1  
2 **Prevalence of prediabetes and undiagnosed diabetes in the Mollerussa prospective**  
3 **observational cohort study in a semi-rural area of Catalonia**  
4  
5  
6

7 Mireia Falguera<sup>1,2</sup>, Maria Belén Vilanova<sup>2,3</sup>, Nuria Alcubierre<sup>4</sup>, Minerva Granado-Casas<sup>2,5</sup>, Josep  
8 Ramon Marsal<sup>6,7</sup>, Neus Miro<sup>8</sup>, Cristina Cebrian<sup>9</sup>, Àngels Molló<sup>10</sup>, Josep Franch-Nadal<sup>11,12</sup>, Manel  
9 Mata-Cases<sup>11,13</sup>, Esmeralda Castelblanco<sup>11,14</sup>, Didac Mauricio<sup>2,14</sup>  
10  
11  
12  
13

14 <sup>1</sup> Primary Health Care Centre Cervera, Gerència d'Atenció Primària, Institut Català de la Salut,  
15 Cervera, Spain  
16

17 <sup>2</sup> Biomedical Research Institute of Lleida & University of Lleida, Lleida, Spain  
18

19 <sup>3</sup> Primary Health Care Centre Igualada Nord, Gerència d'Atenció Primària, Institut Català de la  
20 Salut, Lleida, Spain  
21

22 <sup>4</sup> Department of Nutrition and Dietetics, Avantmedic, Lleida, Spain  
23

24 <sup>5</sup> Department of Endocrinology & Nutrition, Health Sciences Research Institute & University  
25 Hospital Germans Trias i Pujol, Badalona, Spain  
26

27 <sup>6</sup> Unitat de Suport a la Recerca Lleida, Fundació Institut Universitari per a la Recerca a l'Atenció  
28 Primària de Salut Jordi Gol i Gurina (IDIAPJGol), & CIBER of Epidemiology and Public Health  
29 (CIBERESP), Lleida, Spain  
30

31 <sup>7</sup> Epidemiology Unit of the Cardiovascular Service, Hospital Universitari Vall d'Hebron, Barcelona,  
32 Spain  
33

34 <sup>8</sup> Primary Health Care Centre Tàrraga, Gerència d'Atenció Primària, Institut Català de la Salut,  
35 Lleida, Spain  
36

37 <sup>9</sup> Primary Health Care Centre Mollerussa, Gerència d'Atenció Primària, Institut Català de la Salut,  
38 Lleida, Spain  
39

40 <sup>10</sup> Primary Health Care Centre Guissona, Gerència d'Atenció Primària, Institut Català de la Salut,  
41 Lleida, Spain  
42

43 <sup>11</sup> DAP-Cat Group, Unitat de Suport a la Recerca Barcelona, Fundació Institut Universitari per a la  
44 Recerca a l'Atenció Primària de Salut Jordi Gol i Gurina (IDIAPJGol), & CIBER on Diabetes and  
45 Associated Metabolic Diseases (CIBERDEM), Barcelona, Spain  
46

47 <sup>12</sup> Primary Health Care Centre Raval Sud, Gerència d'Atenció Primària, Institut Català de la Salut,  
48 Barcelona, Spain  
49

50 <sup>13</sup> Primary Health Care Centre La Mina, Gerència d'Atenció Primària Barcelona, Institut Català de la  
51 Salut, Sant Adrià de Besòs, Spain  
52  
53  
54  
55  
56  
57  
58  
59  
60

1  
2 <sup>14</sup> Department of Endocrinology & Nutrition, Hospital de la Santa Creu i Sant Pau & Institut  
3 d'Investigació Biomèdica Sant Pau (IIB Sant Pau), & CIBER on Diabetes and Associated Metabolic  
4 Diseases (CIBERDEM), Barcelona, Spain  
5  
6  
7  
8  
9  
10

### 11 **Corresponding authors**

12 Didac Mauricio

13 Department of Endocrinology & Nutrition; Hospital de la Santa Creu i Sant Pau

14 Sant Quintí, 89, 08041 Barcelona, Spain

15 Tel.: +34 935565661, Fax: +34 935565602

16 E-mail address: didacmauricio@gmail.com  
17  
18  
19  
20  
21  
22

23 Esmeralda Castelblanco

24 Sant Pau Biomedical Research Institute

25 Sant Quintí, 77-79, 08041 Barcelona, Spain

26 Tel.: +34 935565661  
27  
28  
29  
30  
31  
32

31 E-mail address: esmeraldacas@gmail.com  
32  
33  
34  
35  
36  
37  
38  
39  
40  
41

35 Word count: 3556 words

36 Figures: 2 figures and 3 tables  
37  
38  
39  
40  
41

### 42 **ABSTRACT**

43  
44  
45 **Objectives:** To assess the prevalence of undiagnosed diabetes and prediabetes in the healthy  
46 population in the Mollerussa cohort. As a secondary objective, to identify the variables associated  
47 with these conditions and to describe the changes in glycaemic status after one year of follow-up  
48 in subjects with prediabetes.  
49  
50  
51

52 **Design:** Prospective observational cohort study.

53 **Setting:** General population from a semi-rural area.

54  
55 **Participants:** The study included 583 participants without a diagnosis of diabetes recruited  
56 between March 2011 and July 2014.  
57  
58

59 **Results:** The prevalence of undiagnosed diabetes was 20, 3.4% (95% confidence interval 2.6 - 4.2)  
60 and that of prediabetes was 229, 39.3% (37.3 - 41.3). Among those with prediabetes, 18.3% had

1  
2 isolated impaired fasting plasma glucose (IFPG) (IFPG: 100 to <126 mg/dL), 58.1% had isolated  
3 impaired HbA1c (HbA1c 5.7 - <6.5), and 23.6% fulfilled both criteria. Follow-up data were available  
4 for 166 subjects; 41.6% (37.8 - 45.4) returned to normoglycaemia, 57.6% (57.8 - 61.4) persisted in  
5 prediabetes, and 0.6% (0 -1.2) progressed to diabetes. Individuals with prediabetes had worse  
6 cardiometabolic risk profiles and sociodemographic features than normoglycaemic subjects. In the  
7 logistic regression model, variables significantly associated with prediabetes were older age (odds  
8 ratio; 95% confidence interval) (1.033; 1.011-1.056), higher physical activity (0.546; 0.360 - 0.827),  
9 body mass index (1.121; 1.029 - 1.222), and a family history of diabetes (1.543; 1.025 - 2.323). The  
10 variables significantly associated with glycaemic normalization were older age (0.948; 0.916 -  
11 0.982) and body mass index (0.779; 0.651 - 0.931).

12  
13  
14  
15  
16  
17  
18  
19  
20  
21 **Conclusions:** Among adults in our region, the estimated prevalence of undiagnosed diabetes was  
22 3.4% and that of prediabetes was 39.3%. After a one-year follow-up, a small proportion of subjects  
23 (0.6%) with prediabetes progressed to diabetes, while a high proportion (41.6%) returned to  
24 normoglycaemia. Individuals with prediabetes who returned to normoglycaemia were younger  
25 and had a lower body mass index.

## 30 31 **KEYWORDS**

32  
33 Prediabetes, undiagnosed diabetes, prediabetes prevalence

## 34 35 36 37 **ARTICLE SUMMARY**

### 38 **Strengths and Limitations**

- 39  
40 • This was a population-based study of a small cohort that included a representative sample  
41 of a non-previously studied population of a semi-rural area in Catalonia.
- 42  
43 • We did not perform an oral glucose tolerance test, which is a common test in most studies  
44 but is a time-consuming and expensive procedure.
- 45  
46 • The percentage of glucose normalization among prediabetic subjects was higher than  
47 expected compared to the percentages described in previous studies.
- 48  
49 • The small number of cases of undiagnosed diabetes precluded further statistical analyses  
50 on this topic.
- 51  
52  
53  
54  
55  
56  
57

## 58 59 **BACKGROUND**

1  
2 Diabetes mellitus, a public health concern with an increasing incidence worldwide, is a great  
3 threat to general health and is leading to increased morbidity and mortality. These effects are  
4 mainly occurring because diabetes is a disorder of glucose metabolism that affects multiple organ  
5 systems and is associated with various micro- and macro-vascular complications and several  
6 nonvascular complications. Additionally, a large group of subjects do not fulfil the diabetes criteria  
7 but have intermediate glycaemic variables, between normal and diabetes, and are thus classified  
8 as having prediabetes. One of the most commonly used definitions of prediabetes is that of the  
9 2010 American Diabetes Association (ADA) criteria[1, 2]: (a) impaired fasting plasma glucose (IFG),  
10 defined as fasting plasma glucose (FPG) between 100 and <126 mg/dL (5.6–5.9 mmol/L); (b)  
11 impaired glucose tolerance (IGT), defined as a 2-hour plasma glucose value after a 75 g oral  
12 glucose tolerance test (OGTT) between 140 and <200 mg/dL (7.8–11.0 mmol/L); or (c) glycated  
13 haemoglobin (HbA1c) levels between 5.7% and < 6.5% (39–46 mmol/mol).

14  
15  
16  
17  
18  
19  
20  
21  
22  
23  
24  
25  
26 Prediabetes is becoming increasingly important as it represents a high risk of developing type 2  
27 diabetes (T2D) and cardiovascular diseases.[2, 3] Moreover, individuals with prediabetes are  
28 phenotypically quite similar to patients with T2D. That is, they tend to be older, with a higher body  
29 mass index (BMI) and higher blood pressure than people with normal glucose tolerance; in  
30 addition, they tend to have insulin resistance and dyslipidaemia.[4] Additionally, multiple risk  
31 factors, such as family history, gestational diabetes, and certain ethnicities as well as combined  
32 risk factors such as metabolic syndrome, are known to predispose subjects to a higher risk for  
33 prediabetes and its progression to T2D.[5] Based only on impaired glucose tolerance (IGT), the  
34 worldwide prevalence of prediabetes among adults has been estimated by the International  
35 Diabetes Federation to be 7.3% in 2017, with half of these individuals (49%) being younger than 50  
36 years.[6] The National Diabetes Statistics Report in the United States reported that the total crude  
37 prevalence of diabetes was 9.4% (30.3 million, 2017 US population), with 23.8% undiagnosed and  
38 an additional 33.9% with prediabetes.[7]

39  
40  
41  
42  
43  
44  
45  
46  
47  
48  
49  
50  
51 In Spain, according to data from the Di@bet.es study, based on OGTT, FPG and HbA1c, 13.8% of  
52 the adult population, adjusted for age and sex, had diabetes, and of these individuals up to 6% had  
53 undiagnosed diabetes. Furthermore, an additional 14.8% of individuals presented with some type  
54 of prediabetic state, 3.4% based on IFG, 9.2% based on IGT and 2.2% with disturbances in both,  
55 after adjusting for age and sex.[8, 9] According to the ADA, up to 70% of people with prediabetes  
56 will develop overt diabetes throughout their lives.[10, 11] Moreover, each year, 5-10% of subjects  
57  
58  
59  
60

1  
2 with prediabetes will eventually develop overt diabetes, and according to some studies, this  
3 percentage can reach up to 18% per year; however, this rate may vary with the definition of  
4 prediabetes and population characteristics.[12-15] It has been shown that over 3-5 years,  
5 approximately 25% of subjects progress to T2D, 25% return to a normal state of glucose tolerance  
6 and 50% remain in the prediabetic state.[16] Thus, the early diagnosis and screening of  
7 prediabetes are essential steps towards the prevention of its progression or at least the delay of  
8 the onset of T2D.  
9  
10  
11  
12  
13  
14  
15

16 The primary aim of this study was to assess the prevalence of undiagnosed diabetes and  
17 prediabetes in the healthy population in the Mollerussa cohort. As a secondary objective, we  
18 aimed to assess the variables associated with these conditions and to describe the changes in  
19 glycaemic status after one year of follow-up in subjects with prediabetes.  
20  
21  
22  
23  
24  
25

## 26 **METHODS**

### 27 **Subjects**

28 This was a prospective population-based cohort study from the semi-rural area of Mollerussa in  
29 Catalonia (northeast Spain) selected between March 2011 and July 2014. The description of the  
30 cohort and the procedures performed were initially published as a cohort profile.[17] Briefly, the  
31 database of the Catalan Health Institute (ICS) through its Primary Care Electronic Clinical Station  
32 (Estació Clínica Electronica d'Atenció Primària –eCAP) was used to select the population sample.  
33 All population is passively included in the Primary Care Electronic Clinical record according to the  
34 Spanish health system, which is based on the principles of universality, free access, equity and  
35 fairness of financing.[18] Then, from a total population of 24,666 potentially eligible individuals in  
36 the health-care area (subjects older than 25 years and attending any Primary Healthcare Centre in  
37 the same health area), 2,226 subjects were randomly selected using a randomiser programme  
38 (SPSS software V.16.0 for Windows; SPSS), following the principles of simple random sampling,  
39 and were then invited to participate by telephone contact. Based on their willingness to join the  
40 study, exclusion criteria, consent and baseline laboratory data, 594 subjects aged  $\geq 25$  years were  
41 finally included.[17] The exclusion criteria included a previous diagnosis of diabetes (type 1  
42 diabetes (T1D), T2D or any specific subtype of diabetes), treatment with oral antidiabetic drugs or  
43 the use of metformin for other conditions. In addition, subjects with cardiovascular disease (heart  
44 disease, heart failure, aortic stenosis), cancer, kidney disease, anaemia, hepatitis, gastrointestinal  
45 diseases, recent abdominal surgery, chronic pulmonary obstructive disease, chronic infectious  
46  
47  
48  
49  
50  
51  
52  
53  
54  
55  
56  
57  
58  
59  
60

1  
2 diseases, use of systemic glucocorticoids or beta blockers or major psychiatric disorders with  
3 psychotic symptoms were excluded from the study. Subjects were considered to have  
4 hypertension or dyslipidaemia if they were using anti-hypertensive or lipid-lowering agents.  
5 Prediabetes was defined as any of the following abnormal glycaemic variables: FPG 100 to <126  
6 mg/dL or HbA1c 5.7 to <6.5%; diabetes was defined as FPG >125 mg/dL or HbA1c  $\geq$ 6.5%. Normal  
7 glycaemic status was defined by FPG <100 mg/dL and HbA1c <5.7 according to the 2010 ADA  
8 criteria.[1] Eleven subjects without baseline HbA1c or FPG measurements were excluded. Subjects  
9 with prediabetes at baseline (n=229) underwent a second visit 12 months after the baseline visit,  
10 and 166 (72.5%) of them had relevant information at follow up.

11 A fasting blood sample was taken to determine glucose, HbA1c, total cholesterol, HDL-cholesterol,  
12 LDL-cholesterol, triglycerides, renal function, and other parameters following standard  
13 protocols.[17] The fatty liver index (FLI) was calculated with the equation developed by Bedogni *et*  
14 *al.* [19] Insulin resistance was calculated by the homeostatic model assessment (HOMA2-IR); beta  
15 cell function (HOMA2- $\beta$ ) and insulin sensitivity (HOMA2-S) data were calculated with a HOMA2  
16 calculator released by the Diabetes Trials Unit, University of Oxford: HOMA Calculator. This  
17 calculator is available at: <http://www.dtu.ox.ac.uk/homacalculator/> (updated October 11, 2017).  
18 [20] The estimated glomerular filtration rate (eGFR) was calculated with the Chronic Kidney  
19 Disease Epidemiology Collaboration equation.[21]

20 Sociodemographic variables were recorded by researchers following a protocol for the inclusion of  
21 patients using a standardized baseline questionnaire during the clinical interview. In all cases a  
22 physical examination (including weight, height, blood pressure and waist circumference) was  
23 carried out by trained research staff. Education level and physical activity were assessed according  
24 to the International Standard Classification of Education[22] and the Spanish-validated  
25 International Physical Activity Questionnaire,[23] respectively. We classified the education level as  
26 low level (studied until primary school) and high level (secondary high school education or higher).  
27 Physical activity was classified as sedentary or active (not regularly versus regularly active).

### 28 **Ethical approval**

29 The study protocol was approved by the Ethics Committee of the Primary Health Care University  
30 Research Institute (IDIAP) Jordi Gol (P12/043) and was conducted following the Declaration of  
31 Helsinki. All study participants signed an informed consent form.

### 32 **Sample size**

33 The sample size was determined based on an estimated prediabetes prevalence of 35.5% and 38%  
34 using HbA1c levels and the 2010 ADA criteria, respectively.[1, 24, 25] It was estimated that a  
35



1  
2 random sample of 505 subjects was sufficient to assess an estimated prevalence of approximately  
3  
4 30% with a 95% CI and an error of  $\pm 4\%$ .<sup>[17]</sup>

### 5 6 **Statistical methods**

7 Descriptive statistics of the mean (standard deviation) or median [interquartile range] were  
8  
9 estimated for quantitative variables with a normal or non-normal distribution, respectively.  
10  
11 Qualitative variables were assessed using absolute and relative frequencies. Normally distributed  
12  
13 data were analysed using the Shapiro-Wilk test. Comparisons between groups of all variables were  
14  
15 performed to evaluate the differences. Student's t-test, ANOVA, the Mann-Whitney test, or the  
16  
17 Kruskal-Wallis test were used to assess the differences between groups. The chi-squared test or  
18  
19 Fisher's exact test were used to determine differences in qualitative variables. Tukey's correction  
20  
21 was applied to account for multiple tests. Multivariate logistic regression models were used to  
22  
23 determine the association of variables with prediabetes, isolated FPG, isolated HbA1c and both  
24  
25 FPG and HbA1c at baseline and were performed using the enter method with covariables that  
26  
27 were clinically or statistically associated. In the prediabetes model, the variables used were age,  
28  
29 sex, education level, physical activity, DLP, HT, family history of diabetes, BMI, waist, glomerular  
30  
31 filtration rate and fatty liver index. A backward conditional logistic regression model was used to  
32  
33 predict the normalization of the glycaemic state; in all models, the goodness-of-fit assumption was  
34  
35 tested by the Hosmer-Lemeshow test. The predictive accuracy of the logistic regression model for  
36  
37 normalization was checked by receiver-operating characteristic (ROC) curves and the area under  
38  
39 the ROC curve ( $AUC_{ROC}$ ). Odds ratios with corresponding 95% confidence intervals are shown, and  
40  
41 statistical significance was established as a p-value  $< 0.05$ . Data management and all analyses were  
42  
43 performed using R statistical software, version 3.3.1, and SPSS software (version 22, IBM, SPSS,  
44  
45 Chicago, Illinois, USA).

### 44 45 **Patient and Public Involvement**

46 This research was done without patient involvement. Patients were not invited to comment on  
47  
48 the study design and were not consulted to develop patient relevant outcomes or interpret the  
49  
50 results. Patients were not invited to contribute to the writing or editing of this document for  
51  
52 readability or accuracy.  
53

### 54 55 **RESULTS**

56 Out of the 594 individuals recruited, complete data on FPG and HbA1c were available from 583  
57  
58 (98.1%). The prevalence of undiagnosed diabetes was 20 subjects, 3.4% (95% confidence interval:  
59  
60 2.7-4.2), and the prevalence of prediabetes was 229 subjects, 39.3% (37.3-41.3). Furthermore, the

prevalence based on isolated FPG was 7.2%, and that based on isolated HbA1c was 22.8%, while based on the criteria of both FPG and HbA1c, the prevalence was 9.3% (Figure 1).

The differences of clinical and sociodemographic characteristics between normoglycaemic with prediabetic and diabetic groups are shown in Table 1. Except for sex, family history of diabetes, current smoking status, alcohol consumption status, triglycerides and high density lipoprotein (HDL)-cholesterol levels, there were significant differences in the majority of parameters, including age and BMI, between the three groups.

We observed an association in age, BMI, waist circumference, systolic and diastolic blood pressure (SBP and DBP), alcohol consumption status, hypertension, dyslipidaemia, triglycerides, total cholesterol, low density lipoprotein (LDL)-cholesterol, insulin test, FLI, and HOMA2-IR, which were higher in individuals with prediabetes than in individuals with normoglycaemia and were higher in the diabetic group than in the prediabetic group. On the other hand, physical activity, education level, eGFR, HOMA2- $\beta$  and HOMA2-S exhibited a negative trend between the same groups. In the prediabetic group, 41.9% had impaired FPG and 81.7% had impaired HbA1c. On the other hand, among the newly identified diabetic subjects, up to 80% met the FPG criteria and 85% met the HbA1c criteria. The prevalence of prediabetes increased with increasing age, with percentages of 17.4%, 28.6%, 46.4%, 50 and 52.9% in participants aged <35 years, 36-45 years, 46-55 years, 56-65 years and >65 years, respectively. Regarding BMI categories of normal weight (BMI <25 kg/m<sup>2</sup>), overweight (BMI 25-29.9 kg/m<sup>2</sup>), and obese (BMI>30 kg/m<sup>2</sup>), the prevalence of prediabetes was 29%, 45.9%, and 49%, respectively (Supplementary file 1 Figure 1).

**Table 1.** Clinical and sociodemographic differences among glycaemic status groups of the Mollerussa cohort.

|                        | <b>Normoglycaemia</b><br>FPG <100 mg/dL<br>and HbA1c <5.7% | <b>Prediabetes</b><br>FPG 100 to 125 mg/dL,<br>or HbA1c 5.7 to 6.4% | <b>Diabetes</b><br>FPG >125 mg/dL<br>or HbA1c $\geq$ 6.5% | <b>Difference</b><br><b>normoglycaemia vs.</b><br><b>prediabetes</b> | <b>Difference</b><br><b>normoglycaemia vs.</b><br><b>diabetes</b> |
|------------------------|------------------------------------------------------------|---------------------------------------------------------------------|-----------------------------------------------------------|----------------------------------------------------------------------|-------------------------------------------------------------------|
| N                      | 334                                                        | 229                                                                 | 20                                                        | -                                                                    | -                                                                 |
| Sex, women             | 193 (57.8%)                                                | 135 (59.0%)                                                         | 13 (65.0%)                                                | 0.6 [-7.7- 8.8]                                                      | 6.6 (-14.9-28.2)                                                  |
| Age, years             | 45.0 [37.0;55.8]                                           | 54.0 [46.0;62.0]                                                    | 62.0 [53.2;69.5]                                          | 7.5 [5.4- 9.6]                                                       | 14.2 (8.4- 19.9)                                                  |
| BMI, Kg/m <sup>2</sup> | 25.0 [22.5;27.3]                                           | 26.4 [24.8;29.7]                                                    | 30.9 [26.4;35.6]                                          | 2.1 [1.4- 2.9]                                                       | 4.9 (2.9- 6.9)                                                    |
| BMI categories         |                                                            |                                                                     |                                                           |                                                                      |                                                                   |
| Normal weight          | 160 (50.0%)                                                | 67 (30.2%)                                                          | 4 (20.0%)                                                 | -18.6 [-26.6- -10.7]                                                 | -27.9 (-46.2- -9.6)                                               |
| Overweight             | 120 (37.5%)                                                | 106 (47.7%)                                                         | 5 (25.0%)                                                 | 10.4 [2.1-18.6]                                                      | 10.9[-30.6-8.7]                                                   |
| Obesity                | 40 (12.5%)                                                 | 49 (22.1%)                                                          | 11 (55.0%)                                                | 9.4 [3.1- 15.8]                                                      | 43.0 (20.9-65.1)                                                  |
| Waist, cm              | 93.0 [84.0;100]                                            | 97.0 [89.0;104]                                                     | 100 [91.0;108]                                            | 5.1 [2.9- 7.2]                                                       | 9.3 [3.8- 14.9]                                                   |
| SBP, mm Hg             | 119 [109;128]                                              | 125 [116;136]                                                       | 132 [114;144]                                             | 6.7 [3.9- 9.5]                                                       | 10.9 [3.5- 18.5]                                                  |

|    |                                |                  |                  |                  |                      |                      |
|----|--------------------------------|------------------|------------------|------------------|----------------------|----------------------|
| 1  |                                |                  |                  |                  |                      |                      |
| 2  | DBP, mm Hg                     | 75.0 [69.0;82.0] | 78.0 [71.0;85.0] | 79.0 [72.5;86.0] | 2.5 [0.8- 4.2]       | 2.3 [-2.2- 6.8]      |
| 3  | Hypertension                   | 37 (11.1%)       | 49 (21.4%)       | 9 (45.0%)        | 10.3 [4.0- 16.6]     | 33.9 [11.9- 55.9]    |
| 4  | Dyslipidaemia                  | 27 (8.08%)       | 39 (17.0%)       | 5 (25.0%)        | 8.9 [3.2- 14.6]      | 16.9 [-2.3- 36.1]    |
| 5  | Family history DM              | 94 (29.6%)       | 78 (37.0%)       | 8 (42.1%)        | 5.9 [-1.9- 13.7]     | 11.8 [-10.1- 33.9]   |
| 6  | Education, high level          | 265 (82.6%)      | 145 (65.0%)      | 11 (55.0%)       | -16.0 [-23.6- -8.4]  | -24.3 [-46.6- -2.1]  |
| 7  | Physical activity              | 243 (75.9%)      | 141 (63.2%)      | 10 (50.0%)       | -11.2 [-19.1- -3.3]  | -22.7 [-45.2- 0.3]   |
| 8  | Current smoker                 | 82 (24.6%)       | 63 (27.5%)       | 3 (15.0%)        | 3.0 [-4.4- 10.4]     | -9.5 [-25.9- 6.8]    |
| 9  | Alcohol, g/day                 | 2.84 [0.00;10.6] | 3.42 [0.04;15.9] | 7.04 [1.42;11.5] | 4.0 [0.9- 6.9]       | 2.2 [-5.8- 10.3]     |
| 10 | FPG, mg/dL                     | 87.0 [82.0;92.0] | 97.0 [89.0;106]  | 126 [110;131]    | 10.4 [8.8- 11.9]     | 32.6 [28.4- 36.8]    |
| 11 | HbA1c, %                       | 5.30 [5.10;5.50] | 5.80 [5.70;6.00] | 6.50 [6.07;6.62] | 0.6 [0.5- 0.6]       | 1.0 [0.9- 1.1]       |
| 12 | HbA1c, mmol/mol                | 34.4 [32.2;36.6] | 39.9 [38.8;42.1] | 47.5 [42.9;48.9] | 6.1 [5.6- 6.6]       | 11.1 [9.7- 12.5]     |
| 13 | eGFR mL/min/1.73m <sup>2</sup> | 97.5 [87.7;106]  | 91.5 [78.6;102]  | 89.0 [68.0;101]  | -6.2 [-8.5- -3.7]    | -11.2 [-17.9- -4.4]  |
| 14 | Triglycerides, mg/dL           | 86.0 [65.0;119]  | 89.0 [72.0;132]  | 112 [70.8;161]   | 6.6 [-6.8- 19.9]     | 11.2 [-24.7- 47.1]   |
| 15 | T-cholesterol, g/dL            | 194 [169;225]    | 202 [184;226]    | 216 [187;244]    | 7.9 [1.9- 14.0]      | 16.9 [0.7- 33.1]     |
| 16 | HDL, mg/dL                     | 57.0 [48.0;68.0] | 57.0 [50.0;68.0] | 64.0 [49.8;78.0] | 0.1 [-2.4- 2.6]      | 5.9 [-0.8- 12.6]     |
| 17 | LDL, mg/dL                     | 116 [95.8;140]   | 125 [106;146]    | 125 [111;150]    | 6.3 [1.1- 11.4]      | 7.5 [-6.3- 21.4]     |
| 18 | Insulin, µU/mL                 | 7.10 [5.30;9.70] | 8.40 [6.60;11.8] | 12.6 [9.25;15.6] | 2.1 [1.2- 3.0]       | 8.2 [5.8- 10.7]      |
| 19 | Fatty Liver Index              | 26.4 [10.9;53.5] | 40.4 [18.9;68.2] | 61.5 [37.9;92.0] | 10.3 [5.5- 15.0]     | 25.4 [12.8- 38.0]    |
| 20 | HOMA2-β                        | 100 [82.0;124]   | 93.3 [73.0;115]  | 80.2 [61.1;97.9] | -6.3 [-11.8- -0.8]   | -14.9 [-29.7- -0.2]  |
| 21 | HOMA2-S                        | 110 [80.1;145]   | 87.7 [64.4;112]  | 59.1 [46.0;80.9] | -23.8 [-32.0- -15.6] | -54.4 [-76.3- -32.6] |
| 22 | HOMA2-IR                       | 0.90 [0.70;1.20] | 1.10 [0.90;1.60] | 1.70 [1.28;2.20] | 0.3 [0.2- 0.4]       | 1.1 [0.8- 1.4]       |

26  
27  
28 Median [interquartile range] and n (%). NG, normoglycaemia; PD, prediabetes; DM, diabetes; Ed level, education level;  
29 BMI, body mass index; SBP, systolic blood pressure; DBP, diastolic blood pressure; FPG, fasting plasma glucose; eGFR,  
30 estimated glomerular filtration rate; T-cholesterol, total cholesterol; HDL, high-density lipoprotein cholesterol; LDL,  
31 low-density lipoprotein cholesterol; HOMA2-IR, Homeostatic Model Assessment-2\_Insulin Resistance; HOMA2-β,  
32 Homeostatic Model Assessment-2 Beta cell function; HOMA2-S, Homeostatic Model Assessment-2 Insulin Sensitivity.  
33  
34

35  
36  
37 Table 2 shows the characteristics of prediabetic individuals by glycaemic state: isolated FPG,  
38 isolated HbA1c and both altered FPG and HbA1c. Thus, among the 229 subjects with prediabetes,  
39 42 (18.3%) had abnormal isolated FPG, 133 (58.1%) had abnormal isolated HbA1c, and 54 (23.6%)  
40 had both abnormal FPG and HbA1c. Patients with both abnormal FPG and HbA1c were older, had  
41 larger waist circumferences, had increased FLI and HOMA2-IR, were more likely to be overweight  
42 or obese and have hypertension, and had lower HOMA2-S. The isolated FPG group had a higher  
43 proportion of subjects with a family history of diabetes, higher alcohol consumption, higher levels  
44 of total cholesterol and LDL-cholesterol and lower levels of HDL-cholesterol, although none of  
45 these differences were statistically significant. Finally, the isolated HbA1c group had an elevated  
46 HOMA2-β. Although there were no statistically significant differences, the proportion of men was  
47 higher in the isolated FPG group, whereas the proportion of women was higher in the isolated  
48 HbA1c and both FPG and HbA1c groups. Among the three groups, no statistically significant  
49 differences were found regarding the following variables: sex, dyslipidaemia, family history of  
50  
51  
52  
53  
54  
55  
56  
57  
58  
59  
60

diabetes, education level, physical activity, current smoking status, alcohol consumption, triglycerides, total cholesterol, HDL-cholesterol or LDL-cholesterol.

**Table 2.** Clinical and sociodemographic characteristics by glycaemic status of the individuals with prediabetes.

|                                 | Impaired HbA1c<br>5.7%-6.4% | Impaired FPG<br>100-125 mg/dL | HbA1c 5.7%-<br>6.4% and FPG<br>100-125 mg/dL | <i>p</i><br>overall | <i>p</i> HbA1c<br>vs. FPG | <i>p</i> HbA1c<br>vs. Both | <i>p</i> . FPG<br>vs. Both |
|---------------------------------|-----------------------------|-------------------------------|----------------------------------------------|---------------------|---------------------------|----------------------------|----------------------------|
| N                               | 133                         | 42                            | 54                                           | -                   | -                         | -                          | -                          |
| Sex, Women                      | 84 (63.2%)                  | 19 (45.2%)                    | 32 (59.3%)                                   | 0.12                | 0.181                     | 0.74                       | 0.369                      |
| Age, years                      | 53.4 (12.4)                 | 50.6 (11.8)                   | 60.6 (10.5)                                  | <b>&lt;0.001</b>    | 0.388                     | <b>0.001</b>               | <b>&lt;0.001</b>           |
| BMI, Kg/m <sup>2</sup>          | 25.8 [24.5;28.9]            | 27.8 [24.5;30.6]              | 27.5 [25.6;30.5]                             | 0.056               | 0.534                     | <b>0.036</b>               | 0.534                      |
| BMI categories                  |                             |                               |                                              | <b>0.018</b>        | 0.107                     | <b>0.05</b>                | <b>0.032</b>               |
| Normal weight                   | 43 (33.1%)                  | 16 (41.0%)                    | 8 (15.1%)                                    |                     |                           |                            |                            |
| Overweight                      | 64 (49.2%)                  | 12 (30.8%)                    | 30 (56.6%)                                   |                     |                           |                            |                            |
| Obesity                         | 23 (17.7%)                  | 11 (28.2%)                    | 15 (28.3%)                                   |                     |                           |                            |                            |
| Waist, cm                       | 95.0 [88.0;102]             | 98.0 [90.0;106]               | 101 [95.0;107]                               | <b>0.008</b>        | 0.232                     | <b>0.006</b>               | 0.333                      |
| SBP, mm Hg                      | 124 (16.1)                  | 129 (15.5)                    | 128 (18.4)                                   | 0.169               | 0.296                     | 0.29                       | 0.991                      |
| DBP, mm Hg                      | 78.0 (9.44)                 | 79.5 (12.0)                   | 77.9 (9.39)                                  | 0.674               | 0.675                     | 0.999                      | 0.723                      |
| Hypertension                    | 21 (15.8%)                  | 9 (21.4%)                     | 19 (35.2%)                                   | <b>0.014</b>        | 0.542                     | <b>0.019</b>               | 0.32                       |
| Dyslipidaemia                   | 25 (18.8%)                  | 4 (9.52%)                     | 10 (18.5%)                                   | 0.358               | 0.515                     | 1                          | 0.515                      |
| Family history DM               | 43 (34.1%)                  | 18 (48.6%)                    | 17 (35.4%)                                   | 0.265               | 0.471                     | 1                          | 0.471                      |
| Education, high level           | 91 (69.5%)                  | 23 (59.0%)                    | 31 (58.5%)                                   | 0.252               | 0.455                     | 0.455                      | 1                          |
| Physical activity               | 88 (67.2%)                  | 21 (53.8%)                    | 32 (60.4%)                                   | 0.281               | 0.547                     | 0.68                       | 0.68                       |
| Current smoker                  | 38 (28.6%)                  | 14 (33.3%)                    | 11 (20.4%)                                   | 0.338               | 0.693                     | 0.496                      | 0.496                      |
| Alcohol, g/day                  | 2.92 [0.00;15.2]            | 7.42 [0.90;16.3]              | 1.53 [0.00;17.9]                             | 0.369               | 0.336                     | 0.735                      | 0.336                      |
| FPG, mg/dL                      | 89.2 (6.89)                 | 106 (4.97)                    | 109 (5.96)                                   | <b>&lt;0.001</b>    | <b>&lt;0.001</b>          | <b>&lt;0.001</b>           | 0.14                       |
| HbA1c, %                        | 5.80 [5.70;6.00]            | 5.40 [5.40;5.57]              | 5.95 [5.80;6.10]                             | <b>&lt;0.001</b>    | <b>&lt;0.001</b>          | <b>&lt;0.001</b>           | <b>&lt;0.001</b>           |
| HbA1c, mmol/mol                 | 39.9 [38.8;42.1]            | 35.5 [34.7;37.4]              | 41.5 [39.9;43.2]                             | <b>&lt;0.001</b>    | <b>&lt;0.001</b>          | <b>&lt;0.001</b>           | <b>&lt;0.001</b>           |
| eGFR, mL/min/1.73m <sup>2</sup> | 93.6 [79.6;103]             | 93.2 [79.7;107]               | 89.3 [73.1;97.2]                             | 0.076               | 0.556                     | 0.073                      | 0.073                      |
| Triglycerides, mg/dL            | 88.0 [72.0;134]             | 86.5 [67.0;130]               | 106 [74.5;132]                               | 0.332               | 0.729                     | 0.304                      | 0.304                      |
| Total cholesterol, mg/dL        | 205 (34.5)                  | 209 (28.6)                    | 203 (29.8)                                   | 0.689               | 0.767                     | 0.947                      | 0.677                      |
| HDL-cholesterol, mg/dL          | 58.0 [51.0;69.0]            | 52.0 [45.0;65.8]              | 57.0 [51.0;66.0]                             | 0.128               | 0.141                     | 0.755                      | 0.18                       |
| LDL-cholesterol, mg/dL          | 125 (32.2)                  | 133 (25.5)                    | 120 (23.5)                                   | 0.114               | 0.278                     | 0.593                      | 0.096                      |
| Insulin, µU/mL                  | 8.00 [6.10;10.0]            | 9.90 [6.90;15.9]              | 10.9 [7.90;15.6]                             | <b>&lt;0.001</b>    | <b>0.01</b>               | <b>&lt;0.001</b>           | 0.577                      |
| Fatty Liver Index               | 34.4 [16.9;59.2]            | 42.2 [17.7;73.6]              | 53.8 [32.2;73.0]                             | <b>0.016</b>        | 0.373                     | <b>0.011</b>               | 0.378                      |
| HOMA2-β                         | 96.6 [81.5;122]             | 81.7 [64.5;118]               | 82.8 [63.0;108]                              | <b>0.001</b>        | <b>0.034</b>              | <b>0.002</b>               | 0.693                      |
| HOMA2-S                         | 98.0 [77.2;127]             | 75.0 [47.2;107]               | 67.5 [47.5;91.3]                             | <b>&lt;0.001</b>    | <b>0.003</b>              | <b>&lt;0.001</b>           | 0.564                      |
| HOMA2-IR                        | 1.00 [0.80;1.30]            | 1.30 [0.90;2.15]              | 1.50 [1.10;2.10]                             | <b>&lt;0.001</b>    | <b>0.005</b>              | <b>&lt;0.001</b>           | 0.545                      |

Significant values are shown in bold. Mean (SD), median [interquartile range] and n (%). BMI, body mass index; SBP, systolic blood pressure; DBP, diastolic blood pressure; DM, diabetes; FPG, fasting plasma glucose; eGFR, estimated glomerular filtration rate; HDL, high-density lipoprotein; LDL, low-density lipoprotein; HOMA2-IR, Homeostatic Model Assessment-2\_Insulin Resistance; HOMA2-β, Homeostatic Model Assessment-2 Beta cell function; HOMA2-S, Homeostatic Model Assessment-2 Insulin Sensitivity.

### Prediabetes follow-up

Of the 229 individuals with prediabetes at baseline, 166 (72.5%) had clinical and laboratory data after 12 months of follow-up. Of them, 52 (41.6%) returned to a normal glycaemic status, 112 (57.6%) persisted in their state of prediabetes, and only 2 (0.6%) progressed to diabetes. Table 3 shows the outcome of the follow-up of the isolated FPG, HbA1c and both FPG and HbA1c groups.

**Table 3.** Outcomes at follow-up of patients with different altered glucose metabolism statuses at baseline.

| Variables      | Baseline    | N with follow-up | Follow up  |             |            |
|----------------|-------------|------------------|------------|-------------|------------|
|                |             |                  | Normalized | Persisted   | Progressed |
| Prediabetes    | 229 (39.3%) | 166 (90.7%)      | 52 (41.6%) | 112 (57.8%) | 2 (0.6%)   |
| Isolated FPG   | 42 (7.2%)   | 3 (1.8%)         | 1 (33.3%)  | 1 (33.3%)   | 1 (33.3%)  |
| Isolated HbA1c | 133 (22.8%) | 114 (68.7%)      | 47 (41.3%) | 67 (58.7%)  | 0 (0%)     |
| Both altered   | 54 (9.3%)   | 49 (29.5%)       | 4 (8.2%)   | 44 (89.8%)  | 1 (2%)     |

FPG, fasting plasma glucose

### Association of prediabetes with glycaemic status

The multivariate logistic regression model of prediabetes *versus* normoglycaemia showed that the variables associated with prediabetes were older age (odds ratio; 95% confidence interval) (1.033; 1.011-1.056), higher physical activity levels (0.546; 0.360-0.827), higher BMI (1.121; 1.029-1.222), and a family history of diabetes (1.543; 1.025-2.323) (Figure 2a). The models for isolated FPG alterations, isolated HbA1c alterations and both FPG and HbA1c alterations are shown in Supplementary file 2 Tables 1, 2 and 3, respectively. The variables associated with isolated FPG were older age (1.032; 1.008-1.057), higher physical activity levels (0.535; 0.318-0.899), and a family history of diabetes (1.798; 1.067-3.028). On the other hand, the only variable associated with impaired HbA1c was older age (1.048; 1.029-1.067). Finally, in the model for altered FPG and HbA1c, the variables associated were older age (1.056; 1.026-1.086) and high FLI (1.031; 1.002-1.061).

### Prediction of normalization

Backward conditional logistic regression, as described in the methods section, starting with the variables age, sex, waist circumference, BMI, hypertension, physical activity, family history of diabetes, education level, total cholesterol, HDL-cholesterol, FLI and HOMA2-IR, was performed to identify factors independently associated with the prediction of glycaemic status normalization (Supplementary file 2 Table 4). The variables that predicted glycaemic normalization were older

1  
2 age (0.948; 0.916-0.982) and BMI (0.779; 0.651-0.931) (Figure 2b); this model had a good  
3  
4 predictive ability ( $AUC_{ROC}$  0.77;  $p < 0.001$ ) (Supplementary file 3 Figure 2).  
5  
6

## 7 **DISCUSSION**

8  
9 We found that the prevalence of undiagnosed diabetes was 3.4%, and the prevalence of  
10  
11 prediabetes was 39.3% in this semi-rural population in Catalonia (northeast Spain). The prevalence  
12  
13 of prediabetes was three-fold higher based on HbA1c than that based on FPG. Subjects with  
14  
15 prediabetes defined by both HbA1c and FPG criteria had unfavourable clinical and  
16  
17 sociodemographic profiles related to increased cardiovascular risk. These factors were older age;  
18  
19 abdominal obesity; higher triglycerides; increased FFI; and a higher proportion of overweight,  
20  
21 obesity and hypertension. In our population, age was the variable most strongly associated with  
22  
23 prediabetes based on all specific glycaemic status variables: isolated impaired FPG, isolated  
24  
25 impaired HbA1c or both impaired FPG and HbA1c. Other variables associated with prediabetes  
26  
27 were lower physical activity levels, a family history of diabetes, and obesity. Finally, the  
28  
29 characteristics related to normalization at follow-up were younger age and lower BMI.  
30

31  
32 The prevalence of prediabetes and undiagnosed diabetes in our healthy population were within  
33  
34 the ranges found in other population studies defining prediabetes based on the 2010 ADA criteria,  
35  
36 using FPG and/or HbA1c. Among these studies, a large national Chinese study (with 170,287  
37  
38 subjects) showed a prevalence of prediabetes of 35.7% and a prevalence of undiagnosed diabetes  
39  
40 of 6.9%. [26] In a study of the Caribbean population, the corresponding figures were 44.1% for  
41  
42 prediabetes and 7.3% for undiagnosed diabetes. [27] In England, based on HbA1c levels, the  
43  
44 prediabetes prevalence was 35.5% in the adult population in 2011. [24] In these studies, the  
45  
46 prevalence of prediabetes was higher in older, overweight and obese participants. [24, 26, 27]  
47  
48 Many other studies found this relationship of age and obesity with the risk and incidence of  
49  
50 diabetes. [28-31]

51  
52 In the 1999-2002 National Health and Nutrition Examination Survey (NHANES), the prevalence of  
53  
54 undiagnosed diabetes was 2.8%, and up to 26% of the participants had IFG. [32] However, the age-  
55  
56 standardized prevalence of prediabetes based on HbA1c and FPG combined was similar in the  
57  
58 periods between 1999 and 2002 and 2003 and 2006 at 29.2% and 29.3%, respectively, but  
59  
60 increased significantly to 36.2% in the period between 2007 and 2010. [33] This prevalence  
continued to increase to as high as 38% in 2012 among adults from the USA. [25] The change in

1  
2 the prevalence of prediabetes over time occurred because of a significant change in elevated  
3 HbA1c, whereas the prevalence based on elevated FPG was similar over this period.[33] Thus, in  
4 our population, as in the NHANES study, HbA1c was the most significant contributor  
5 to prediabetes prevalence, followed by FPG, which is in concordance with the findings in the  
6 Caribbean population[27] and discordant with the reports from the NHANES study between 2011  
7 and 2014 in which they reported that FPG was the most significant contributor to prediabetes  
8 prevalence followed by HbA1c.[34] Our results show that individuals with isolated impaired  
9 HbA1c when diagnosed with prediabetes might have a slightly better cardiometabolic risk profile  
10 than those with isolated FPG, while those individuals with both impaired FPG and HbA1c had the  
11 worst CV risk. These results are in line with the findings of the prospective observational study in  
12 the primary care setting of a Spanish cohort with prediabetes (PREDAPS) of our group.[35, 36]

13  
14  
15  
16  
17  
18  
19  
20  
21  
22  
23  
24 Additionally, two meta-analyses found that among individuals with prediabetes based on the ADA  
25 criteria, all-cause and CVD mortality were increased[37] and that the risk of cardiovascular disease  
26 increased independently of the glucose assessment in comparison to the risk of normoglycaemic  
27 subjects.[38] Moreover, a recent study concluded that those who returned to normoglycaemia  
28 from FPG- or HbA1c-defined prediabetes were not at reduced risk of future CVD or death.[39]  
29 Studies of shorter duration, over 3-5 years, have shown that approximately 25% of subjects  
30 progress to diabetes, 25% return to a normal state of glucose tolerance and 50% remain in the  
31 prediabetic state;[16] after 1 year, 18.8% of subjects with prediabetes returned to  
32 normoglycaemia and approximately 30% with abnormal FPG, 29.1% with abnormal HbA1c and  
33 7.6% with abnormalities in both FPG and HbA1c returned to a normal state of glucose  
34 tolerance.[40] In our findings from a one-year follow-up, the rate of reversion from prediabetes to  
35 normoglycaemia was approximately 40%, and approximately 60% of participants remained in the  
36 prediabetic state. On the other hand, lifestyle modifications, such as weight loss and increased  
37 physical activity, among other factors associated with prediabetes, reduced the risk of diabetes  
38 among these subjects.[13, 41] According to these reports, in our study, lower BMI was a factor  
39 that was independently associated with the normalization of the glycaemic state, and an active  
40 lifestyle decreased the risk of having prediabetes.

41  
42  
43  
44  
45  
46  
47  
48  
49  
50  
51  
52  
53  
54  
55  
56  
57 The results of this study need to be interpreted in light of its strengths and weaknesses. First, the  
58 number of participants in our study is smaller in comparison to other studies. In addition, the  
59 study may not be representative of urban areas in our region. Thus, the results may not be  
60

1  
2 generalizable to other territories with different population characteristics in our country.  
3  
4 However, the Mollerussa cohort is a representative sample of the region, which is a specific semi-  
5 rural area that has never been specifically investigated. Second, our study sample is probably  
6 healthier than the general population, as we excluded subjects with already known diabetes and  
7 other comorbidities, a lower number of subjects were counted in the denominator, thus resulting  
8 in a higher prevalence of this condition. Third, we did not assess glucose tolerance through an oral  
9 glucose tolerance test, which is common in most population studies. Although this assay is  
10 sensitive, it is also less specific for identifying subjects who could develop diabetes.[42]  
11 Furthermore, the oral glucose tolerance test has a low reproducibility and is a rather time-  
12 consuming and expensive procedure.[9, 43] Conversely, HbA1c and FPG are cost-effective and  
13 more convenient for patients. Currently, FPG is an accepted screening method to detect diabetes  
14 and prediabetes. HbA1c improves the sensitivity of FPG in the detection of early T2D in high-risk  
15 subjects[32, 44] and is a better predictor of CV events than FPG.[45] Fourth, we only followed up  
16 those participants with prediabetes. Thus, we could not analyse the probability of changing from  
17 normoglycaemia to prediabetes or diabetes in this study. Finally, it is probable that the use of the  
18 World Health Organization prediabetes criteria in our study would have resulted in a smaller  
19 proportion of subjects who returned to a normal glycaemic state. The World Health Organization  
20 established a normal concentration of FPG between 110 and <126 mg/dl.[46]

## 36 **Conclusions**

37  
38 For the first time, our study provides information on the prevalence of diabetes and prediabetes in  
39 the Mollerussa health care area, a Mediterranean semi-rural area in northeast Spain. Individuals  
40 with prediabetes had a more unfavourable cardiometabolic risk profile than normoglycaemic  
41 subjects. Moreover, individuals with abnormalities in both criteria used to diagnose prediabetes  
42 had the worst risk profile. Finally, after one year of follow-up, few people progressed to diabetes,  
43 while more than 40% returned to a normal glycaemic state, and nearly 60% persisted in the  
44 prediabetic state. These results suggest that the use of both FPG and HbA1c criteria in clinical  
45 practice could help identify people with high diabetes and cardiovascular risk. Moreover, the  
46 identification of individuals with prediabetes provides an opportunity for intervention through  
47 lifestyle modification and pharmacological treatments not only to reduce the development of  
48 diabetes.  
49  
50  
51  
52  
53  
54  
55  
56  
57  
58  
59  
60



**Acknowledgements** The authors thank Jordi Real for their valuable assistance in conducting the statistical analysis. CIBER of Diabetes and Associated Metabolic Diseases is an initiative from Instituto de Salud Carlos III (Plan Nacional de I+D+I and Fondo Europeo de Desarrollo Regional).

**Author Contributions** MF, EC and DM conceived and designed the study; MBV, JFN, and MMC participated in the study design; MBV, MF, NA, MGC, NM, AM and CC collected the data; EC and JRM performed the statistical analyses; MF, EC, MMC and DM wrote the manuscript. All authors critically reviewed the manuscript and approved the final version to be published.

**Funding** This study was funded by Institut Universitari d'Investigació en Atenció Primària Jordi Gol (IDIAP Jordi Gol).

**Competing interests** None declared.

**Ethics approval** The project was approved by the Ethics Committee of the Primary Health Care University Research Institute (IDIAP) Jordi Gol (PI12/043) Barcelona, Spain.

**Data sharing statement** Readers may contact Dr Didac Mauricio (didacmauricio@gmail.com) regarding the data.

**Patient consent for publication** Not required.

**The original protocol for the study** Readers may find the Cohort description in *BMJ Open* 2017:1-8. doi:10.1136/bmjopen-2016-015158.

## References

1. Olson DE, Rhee MK, Herrick K, et al. Screening for diabetes and pre-diabetes with proposed A1C-based diagnostic criteria. *Diabetes Care* 2010;33:2184-2189. doi:10.2337/dc10-0433
2. American Diabetes Association. 2. Classification and Diagnosis of Diabetes. *Diabetes Care* 2016;40:S11-S24. doi:10.2337/dc17-S005
3. Brannick B, Wynn A, Dagogo-Jack S. Prediabetes as a toxic environment for the initiation of microvascular and macrovascular complications. *Exp Biol Med* 2016;241:1323-1331. doi:10.1177/1535370216654227
4. Ferrannini E. Definition of intervention points in prediabetes. *Lancet Diabetes Endocrinol* 2014;8:1-9. doi:10.1016/S2213-8587(13)70175-X
5. American Diabetes Association. 2. Classification and Diagnosis of Diabetes. Standards of Medical Care in Diabetes – 2019. *Diabetes Care* 2019;42:S13-S28. doi: [10.2337/dc19-S002](https://doi.org/10.2337/dc19-S002)

- 1  
2 6. International Diabetes Federation Diabetes Atlas. 8th ed, 2017.  
3  
4 <http://www.diabetesatlas.org/> (accessed June 2019)
- 5  
6 7. Centers for Disease Control and Prevention. National Diabetes Statistics Report, 2017.  
7  
8 Atlanta, GA: Centers for Disease Control and Prevention, U.S. Dept of Health and Human  
9  
10 Services; 2017. <https://www.cdc.gov/diabetes/data/statistics/statistics-report.html>  
11  
12 (accessed June 2019)
- 13  
14 8. Soriguer F, Goday A, Bosch-Comas A, *et al.* Prevalence of diabetes mellitus and impaired  
15  
16 glucose regulation in Spain: the Di@bet.es Study. *Diabetologia* 2012;55:88-93.  
17  
18 doi:10.1007/s00125-011-2336-9
- 19  
20 9. Mata-Cases M, Artola S, Escalada J, *et al.* Consenso sobre la detección y el manejo de la  
21  
22 prediabetes. Grupo de Trabajo de Consensos y Guías Clínicas de la Sociedad Española de  
23  
24 Diabetes. *Endocrinol Nutr* 2015;1-14. doi:10.1016/j.endonu.2014.10.008
- 25  
26 10. Nathan DM, Davidson MB, DeFronzo RA, *et al.* Impaired Fasting Glucose and Impaired  
27  
28 Glucose Tolerance: Implications for care. *Diabetes Care* 2007;30:753-759.  
29  
30 doi:10.2337/dc07-9920
- 31  
32 11. Tabak AG, Herder C, Rathmann W, *et al.* Prediabetes: a high-risk state for diabetes  
33  
34 development. *Lancet* 2012;379:2279-2290. doi:10.1016/S0140-6736(12)60283-9
- 35  
36 12. Tuomilehto J, Lindström J, Eriksson JG, *et al.* Prevention of type 2 diabetes mellitus by  
37  
38 changes in lifestyle among subjects with impaired glucose tolerance. *N Engl J Med*  
39  
40 2001;344:1343-1350. doi:10.1056/NEJM200105033441801
- 41  
42 13. Knowler WC, Barrett-Connor E, Fowler S, *et al.* Reduction in the Incidence of Type 2  
43  
44 Diabetes with Lifestyle Intervention or Metformin. *N Engl J Med* 2002;346:393-403.  
45  
46 doi:10.1056/NEJMoa012512
- 47  
48 14. Ramachandran A, Snehalatha C, Mary S, *et al.* The Indian Diabetes Prevention Programme  
49  
50 shows that lifestyle modification and metformin prevent type 2 diabetes in Asian Indian  
51  
52 subjects with impaired glucose tolerance (IDPP-1). *Diabetologia* 2006;49:289-297.  
53  
54 doi:10.1007/s00125-005-0097-z
- 55  
56 15. Gerstein HC, Santaguida P, Raina P, *et al.* Annual incidence and relative risk of diabetes in  
57  
58 people with various categories of dysglycemia: A systematic overview and meta-analysis of  
59  
60 prospective studies. *Diabetes Res Clin Pract* 2007;78(3):305-312.  
doi:10.1016/j.diabres.2007.05.004.

- 1
  - 2
  - 3
  - 4
  - 5
  - 6
  - 7
  - 8
  - 9
  - 10
  - 11
  - 12
  - 13
  - 14
  - 15
  - 16
  - 17
  - 18
  - 19
  - 20
  - 21
  - 22
  - 23
  - 24
  - 25
  - 26
  - 27
  - 28
  - 29
  - 30
  - 31
  - 32
  - 33
  - 34
  - 35
  - 36
  - 37
  - 38
  - 39
  - 40
  - 41
  - 42
  - 43
  - 44
  - 45
  - 46
  - 47
  - 48
  - 49
  - 50
  - 51
  - 52
  - 53
  - 54
  - 55
  - 56
  - 57
  - 58
  - 59
  - 60
16. Paulweber B, Valensi P, Lindström J, et al. A European evidence-based guideline for the prevention of type 2 diabetes. *Horm Metab Res* 2010;42:S3-S36. doi:10.1055/s-0029-1240928
17. Vilanova MB, Falguera M, Marsal JR, et al. Prevalence, clinical features and risk assessment of pre-diabetes in Spain: the prospective Mollerussa cohort study. *BMJ Open* 2017;1-8. doi:10.1136/bmjopen-2016-015158
18. Bernal-Delgado E, García-Armesto S, Oliva J, Sánchez Martínez FI, Repullo JR, Peña-Longobardo LM, Ridao-López M, Hernández-Quevedo C. Spain: Health system review. *Health Syst Transit*, 2018;20(2):1–179.
19. Bedogni G, Bellentani S, Miglioli L, et al. The Fatty Liver Index: a simple and accurate predictor of hepatic steatosis in the general population. *BMC Gastroenterol* 2006;6:44-47. doi:10.1186/1471-230X-6-33
20. Levy JC, Matthews DR, Hermans MP. Correct Homeostasis Model Assessment (HOMA) Evaluation Uses the Computer Program. *Diabetes Care* 1998;21:2191-2. doi:10.2337/diacare.21.12.2191
21. Levey AS, Levey, Stevens LA, et al. A new equation to estimate glomerular filtration rate. *Ann Intern Med* 2009;150:604-612. doi:10.7326/0003-4819-150-9-200905050-00006
22. OECD/Eurostat/UNESCO Institute for Statistics. ISCED 2011 Operational Manual: guidelines for Classifying National Education Programmes and Related Qualifications. Paris: OECD Publishing, 2015
23. Roman-Viñas B, Serra-Majem L, Hagströmer M, et al. International Physical Activity Questionnaire: Reliability and validity in a Spanish population. *Eur J Sport Sci* 2010;10:297-304. doi:10.1080/17461390903426667
24. Mainous AG III, Tanner RJ, Baker R, et al. Prevalence of prediabetes in England from 2003 to 2011: population-based, cross-sectional study. *BMJ Open* 2014;4:1-8. doi:10.1136/bmjopen-2014-005002
25. Menke A, Casagrande S, Geiss L, Cowie CC. Prevalence of and Trends in Diabetes Among Adults in the United States, 1988-2012. *JAMA* 2015;314:1021-1029. doi:10.1001/jama.2015.10029
26. Wang L, Gao P, Zhang M, et al. Prevalence and Ethnic Pattern of Diabetes and Prediabetes in China in 2013. *JAMA* 2017;317:2515-2516. doi:10.1001/jama.2017.7596

- 1
  - 2
  - 3
  - 4
  - 5
  - 6
  - 7
  - 8
  - 9
  - 10
  - 11
  - 12
  - 13
  - 14
  - 15
  - 16
  - 17
  - 18
  - 19
  - 20
  - 21
  - 22
  - 23
  - 24
  - 25
  - 26
  - 27
  - 28
  - 29
  - 30
  - 31
  - 32
  - 33
  - 34
  - 35
  - 36
  - 37
  - 38
  - 39
  - 40
  - 41
  - 42
  - 43
  - 44
  - 45
  - 46
  - 47
  - 48
  - 49
  - 50
  - 51
  - 52
  - 53
  - 54
  - 55
  - 56
  - 57
  - 58
  - 59
  - 60
27. Unwin N, Howitt C, Rose AM, et al. Prevalence and phenotype of diabetes and prediabetes using fasting glucose vs HbA1c in a Caribbean population. *J Glob Health*. 2017;7:1-11. doi:10.7189/jogh.07.020407
28. Soriguer F, Rojo-Martínez G, Almaraz MC, et al. Incidence of type 2 diabetes in southern Spain (Pizarra Study). *Eur J Clin Invest* 2008;38:126-133. doi:10.1111/j.1365-2362.2007.01910.x
29. DECODE study group. Age- and Sex-Specific Prevalences of Diabetes and Impaired Glucose Regulation in 13 European Cohorts. *Diabetes Care*. 2003;26:61-69. doi:10.2337/diacare.26.1.61
30. Edelstein SL, Knowler WC, Bain RP, et al. Predictors of progression from impaired glucose tolerance to NIDDM: an analysis of six prospective studies. *Diabetes* 1997;46:701-710. doi:10.2337/diab.46.4.701
31. Burke JP, Williams K, Gaskill SP, et al. Rapid Rise in the Incidence of Type 2 Diabetes From 1987 to 1996. *Arch Intern Med* 1999;1450-1456.
32. Cowie CC, Rust KF, Byrd-Holt DD, et al. Prevalence of Diabetes and Impaired Fasting Glucose in Adults in the U.S. Population: National Health and Nutrition Examination Survey 1999-2002. *Diabetes Care* 2006;29:1263-1268. doi:10.2337/dc06-0062
33. Bullard KM, Saydah SH, Imperatore G, et al. Secular Changes in U.S. Prediabetes Prevalence Defined by Hemoglobin A. *Diabetes Care* 2013;36:2286-2293. doi:10.2337/dc12-2563/-/DC1
34. Menke A, Casagrande S, Cowie CC. Contributions of A1c, fasting plasma glucose, and 2-hour plasma glucose to prediabetes prevalence: NHANES 2011-2014. *Ann Epidemiol* 2018;28:681-685.e682. doi:10.1016/j.annepidem.2018.07.012
35. Giraldez-García C, Sangrós FJ, Díaz-Redondo A, et al. Cardiometabolic Risk Profiles in Patients With Impaired Fasting Glucose and/or Hemoglobin A1c 5.7% to 6.4%. *Medicine* 2015;94:e1935-e1938. doi:10.1097/MD.0000000000001935
36. Franch-Nadal J, Caballería L, Mata-Cases M, et al. Fatty liver index is a predictor of incident diabetes in patients with prediabetes: The PREDAPS study. *PLoS One* 2018;13:e0198327-17. doi:10.1371/journal.pone.0198327
37. Huang Y, Cai X, Mai W, et al. Association between prediabetes and risk of cardiovascular disease and all cause mortality: systematic review and meta-analysis. *BMJ* 2016;355:i5953. doi:10.1136/bmj.i5953

- 1  
2  
3  
4  
5  
6  
7  
8  
9  
10  
11  
12  
13  
14  
15  
16  
17  
18  
19  
20  
21  
22  
23  
24  
25  
26  
27  
28  
29  
30  
31  
32  
33  
34  
35  
36  
37  
38  
39  
40  
41  
42  
43  
44  
45  
46  
47  
48  
49  
50  
51  
52  
53  
54
38. Levitan EB, Song Y, Ford ES, Liu S. Is Nondiabetic Hyperglycemia a Risk Factor for Cardiovascular Disease? *Arch Intern Med* 2004;2147-2155. doi:10.1001/archinte.164.19.2147
  39. Vistisen D, Kivimaki M, Perreault L, et al. Reversion from prediabetes to normoglycaemia and risk of cardiovascular disease and mortality: the Whitehall II cohort study. *Diabetologia* 2019;1-6. doi:10.1007/s00125-019-4895-0
  40. Giráldez-García C, García Soidán FJ, Serrano Martín R, et al. Evolución de pacientes con prediabetes en Atención Primaria de Salud (PREDAPS): resultados del primer año de seguimiento. *Diabetes practica* 2014;5:1-48. <http://www.diabetespractica.com/public/numeros/articulo/92>
  41. Díaz-Redondo A, Giraldez-Garcia C, Carrillo L, et al. Modifiable risk factors associated with prediabetes in men and women: a cross-sectional analysis of the cohort study in primary health care on the evolution of patients with prediabetes (PREDAPS-Study). *BCM Fam Pract* 2015:1-9. doi:10.1186/s12875-014-0216-3
  42. Unwin N, Shaw J, Zimmet P, et al. Impaired glucose tolerance and impaired fasting glycaemia: the current status on definition and intervention. *Diabet Med* 2002;19:708-723.
  43. Gossain VV, Aldasouqi S. The challenge of undiagnosed pre-diabetes, diabetes and associated cardiovascular disease. *Int J Diabetes Mellit* 2010;2:43-46. doi:10.1016/j.ijdm.2009.10.004
  44. Droumaguet C, Balkau B, Simon D, et al. Use of HbA1c in predicting progression to diabetes in French men and women: data from an Epidemiological Study on the Insulin Resistance Syndrome (DESIR). *Diabetes Care* 2006;29:1619-1625. doi:10.2337/dc05-2525.
  45. Selvin E, Steffes MW, Zhu H, et al. Glycated Hemoglobin, Diabetes, and Cardiovascular Risk in Nondiabetic Adults. *N Engl J Med* 2010;362:800-811. doi:10.1056/NEJMoa0908359
  46. World Health Organization. Use of Glycated Haemoglobin (HbA1c) in the Diagnosis of Diabetes Mellitus. Ginebra: World Health Organization, 2011.

## FIGURE LEGENDS

**Figure 1.** Flow diagram of subjects at baseline and after follow-up.

**Figure 2.** Multivariate logistic regression models **a)** model of prediabetes *versus* normoglycaemic state in the Mollerussa cohort at baseline. Significant p values are shown in bold. eGFR, estimated

1  
2 glomerular filtration rate. Hosmer and Lemeshow Test  $p=0.295$ . **b)** model of normalized *versus*  
3  
4 persisted in subjects with follow-up data. Significant  $p$  values are shown in bold. Hosmer and  
5  
6 Lemeshow Test  $p= 0.931$ .  
7  
8  
9  
10  
11  
12  
13  
14  
15  
16  
17  
18  
19  
20  
21  
22  
23  
24  
25  
26  
27  
28  
29  
30  
31  
32  
33  
34  
35  
36  
37  
38  
39  
40  
41  
42  
43  
44  
45  
46  
47  
48  
49  
50  
51  
52  
53  
54  
55  
56  
57  
58  
59  
60

For peer review only

1  
2  
3  
4  
5  
6  
7  
8  
9  
10  
11  
12  
13  
14  
15  
16  
17  
18  
19  
20  
21  
22  
23  
24  
25  
26  
27  
28  
29  
30  
31  
32  
33  
34  
35  
36  
37  
38  
39  
40  
41  
42  
43  
44  
45  
46  
47  
48  
49  
50  
51  
52  
53  
54  
55  
56  
57  
58  
59  
60

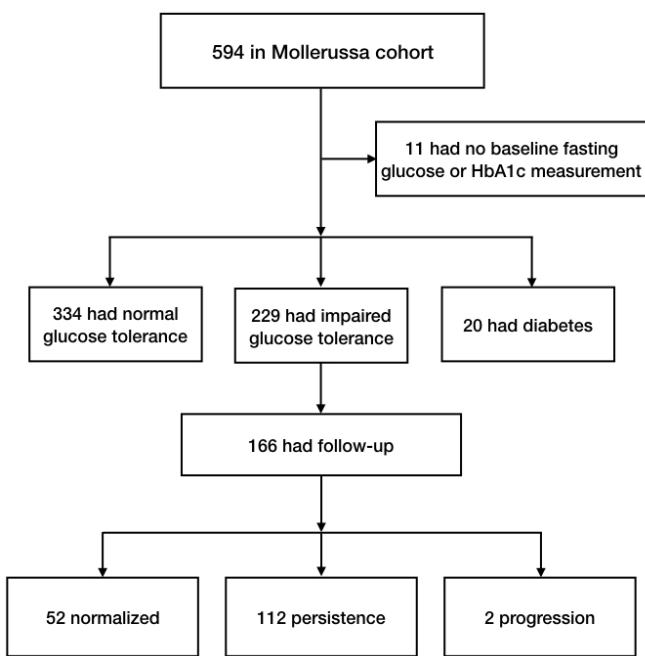

Figure 1. Flow diagram of subjects at baseline and after follow-up.

361x270mm (72 x 72 DPI)

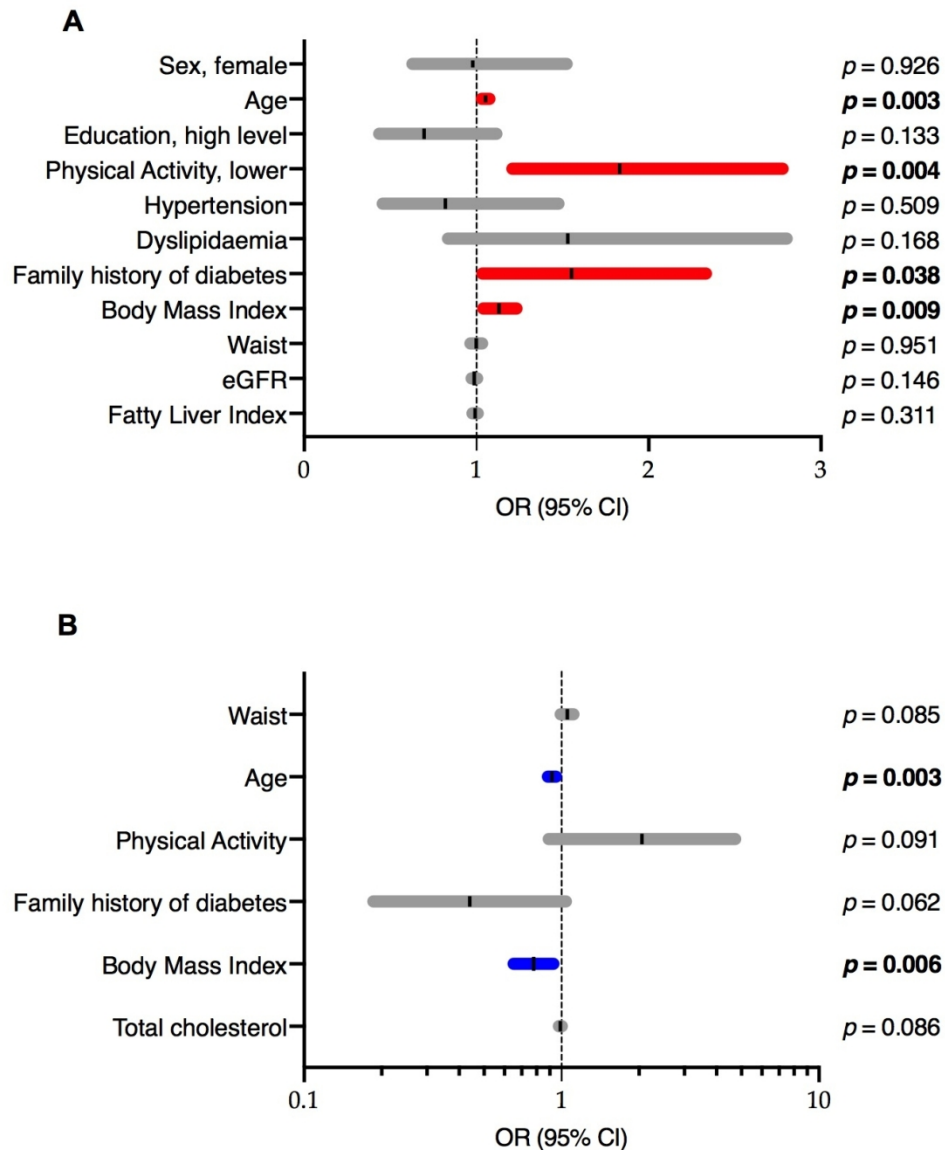

Figure 2. Multivariate logistic regression models a) model of prediabetes versus normoglycaemic state in the Mollerussa cohort at baseline. Significant p values are shown in bold. eGFR, estimated glomerular filtration rate. Hosmer and Lemeshow Test p=0.295. b) model of normalized versus persisted in subjects with follow-up data. Significant p values are shown in bold. Hosmer and Lemeshow Test p= 0.931.

116x142mm (300 x 300 DPI)





**Supplementary Figure 1.** Proportion of patients with prediabetes. A) Stratified by age.  
B) Stratified by body mass index.

**Supplementary Table 1.** Logistic regression model of isolated fasting plasma glucose

|                            | OR    | 95% CI        | p value      |
|----------------------------|-------|---------------|--------------|
| Sex                        | 0.683 | 0.372 - 1.254 | 0.219        |
| Age                        | 1.032 | 1.008 - 1.057 | <b>0.009</b> |
| Education                  | 0.625 | 0.351 - 1.111 | 0.109        |
| Physical activity          | 0.535 | 0.318 - 0.899 | <b>0.018</b> |
| Family history of diabetes | 1.798 | 1.067 - 3.028 | <b>0.028</b> |
| Hypertension               | 1.423 | 0.722 - 2.805 | 0.309        |
| Body mass index            | 0.994 | 0.890 - 1.110 | 0.914        |
| Waist circumference        | 1.006 | 0.962 - 1.053 | 0.789        |
| Fatty liver index          | 1.014 | 0.990 - 1.038 | 0.268        |
| Total cholesterol          | 1.012 | 0.993 - 1.032 | 0.227        |
| Triglycerides              | 0.998 | 0.993 - 1.003 | 0.402        |
| LDL-cholesterol            | 0.986 | 0.965 - 1.008 | 0.212        |

**Supplementary Table 2.** Logistic regression model of isolated HbA1c

|                     | OR    | 95% CI        | p value          |
|---------------------|-------|---------------|------------------|
| Sex                 | 1.304 | 0.830 - 2.050 | 0.249            |
| Age                 | 1.048 | 1.029 - 1.067 | <b>&lt;0.001</b> |
| Education           | 0.917 | 0.575 - 1.461 | 0.715            |
| Physical activity   | 0.668 | 0.440 - 1.013 | 0.058            |
| Hypertension        | 0.848 | 0.481 - 1.497 | 0.570            |
| Body mass index     | 1.080 | 0.990 - 1.179 | 0.083            |
| Waist circumference | 0.996 | 0.963 - 1.030 | 0.822            |
| Fatty liver index   | 1.000 | 0.982 - 1.018 | 0.960            |
| Total cholesterol   | 1.000 | 0.994 - 1.006 | 0.996            |
| Triglycerides       | 0.999 | 0.996 - 1.002 | 0.724            |

**Supplementary Table 3.** Logistic regression model of fasting plasma glucose and HbA1c

|                     | OR    | 95% CI        | p value          |
|---------------------|-------|---------------|------------------|
| Sex, female         | 1.559 | 0.753 - 3.225 | 0.232            |
| Age                 | 1.056 | 1.026 - 1.086 | <b>&lt;0.001</b> |
| Education level     | 0.914 | 0.457 - 1.828 | 0.799            |
| Physical activity   | 0.610 | 0.322 - 1.157 | 0.130            |
| Hypertension        | 1.665 | 0.782 - 3.545 | 0.186            |
| Dyslipidaemia       | 0.818 | 0.357 - 1.870 | 0.633            |
| Body mass index     | 0.901 | 0.788 - 1.030 | 0.128            |
| Waist circumference | 1.012 | 0.960 - 1.066 | 0.665            |
| Triglycerides       | 0.999 | 0.993 - 1.004 | 0.594            |
| Fatty liver index   | 1.031 | 1.002 - 1.061 | <b>0.037</b>     |

**Supplementary Table 4.** Logistic regression model of normalized *versus* persisted in subjects with follow-up data.

|                      | OR    | 95% CI        | p value      |
|----------------------|-------|---------------|--------------|
| Sex(1)               | 1.025 | 0.392 – 2.682 | 0.960        |
| Age                  | 0.956 | 0.917 – 0.998 | <b>0.039</b> |
| Education(1)         | 1.327 | 0.513 – 3.431 | 0.560        |
| Physical_Activity(1) | 1.885 | 0.798 – 4.453 | 0.149        |
| Treat_HT(1)          | 0.865 | 0.268 – 2.791 | 0.808        |
| Family_history_DM(1) | 0.428 | 0.176 – 1.040 | 0.061        |
| BMI                  | 0.749 | 0.605 – 0.926 | <b>0.007</b> |
| Waist                | 1.037 | 0.959 – 1.121 | 0.365        |
| FLI                  | 1.022 | 0.982 – 1.063 | 0.292        |
| HOMA2_IR             | 0.620 | 0.240 – 1.604 | 0.324        |
| Total_cholesterol    | 0.986 | 0.972 – 1.000 | 0.052        |
| HDL_cholesterol      | 1.015 | 0.978 – 1.052 | 0.435        |

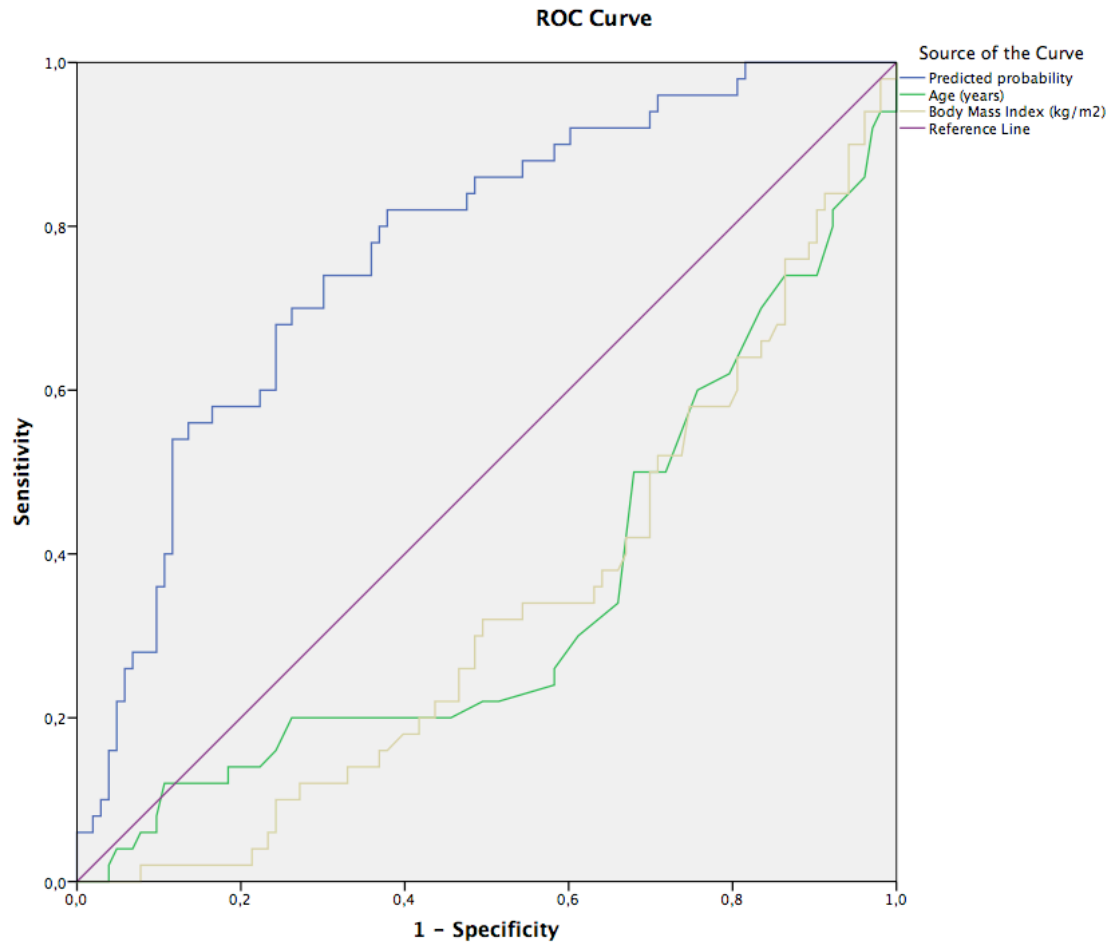

34  
35  
36  
37  
38  
39  
40  
41

| Test Result Variable(s) | Area  | Std. Error | Asymptotic Sig. | Asymptotic 95% Confidence Interval |             |
|-------------------------|-------|------------|-----------------|------------------------------------|-------------|
|                         |       |            |                 | Lower Bound                        | Upper Bound |
| Predicted probability   | 0.771 | 0.040      | 0.000           | 0.693                              | 0.849       |
| Age                     | 0.347 | 0.049      | 0.002           | 0.251                              | 0.442       |
| Body Mass Index         | 0.332 | 0.045      | 0.001           | 0.244                              | 0.421       |

42  
43  
44  
45  
46  
47  
48  
49  
50  
51  
52  
53  
54  
55  
56  
57  
58  
59  
60

**Supplementary Figure 2.** Receiver operating characteristics (ROC) curve showing the relationship between sensitivity and 1-specificity in determining the discriminatory ability of the logistic regression model and the variables age and body mass index separately.

# Reporting checklist for cohort study.

Based on the STROBE cohort guidelines.

## Instructions to authors

Complete this checklist by entering the page numbers from your manuscript where readers will find each of the items listed below.

Your article may not currently address all the items on the checklist. Please modify your text to include the missing information. If you are certain that an item does not apply, please write "n/a" and provide a short explanation.

Upload your completed checklist as an extra file when you submit to a journal.

In your methods section, say that you used the STROBE cohort reporting guidelines, and cite them as:

von Elm E, Altman DG, Egger M, Pocock SJ, Gøtzsche PC, Vandenbroucke JP. The Strengthening of Reporting of Observational Studies in Epidemiology (STROBE) Statement: guidelines for reporting observational studies.

|                           |                     | Reporting Item                                                                                  | Page Number |
|---------------------------|---------------------|-------------------------------------------------------------------------------------------------|-------------|
| <b>Title and abstract</b> |                     |                                                                                                 |             |
| Title                     | <a href="#">#1a</a> | Indicate the study's design with a commonly used term in the title or the abstract              | 1           |
| Abstract                  | <a href="#">#1b</a> | Provide in the abstract an informative and balanced summary of what was done and what was found | 2-3         |
| <b>Introduction</b>       |                     |                                                                                                 |             |
| Background / rationale    | <a href="#">#2</a>  | Explain the scientific background and rationale for the investigation being reported            | 3-4         |
| Objectives                | <a href="#">#3</a>  | State specific objectives, including any prespecified hypotheses                                | 4           |
| <b>Methods</b>            |                     |                                                                                                 |             |

|    |                      |                      |                                                                   |     |
|----|----------------------|----------------------|-------------------------------------------------------------------|-----|
| 1  | Study design         | <a href="#">#4</a>   | Present key elements of study design early in the paper           | 4   |
| 2  |                      |                      |                                                                   |     |
| 3  | Setting              | <a href="#">#5</a>   | Describe the setting, locations, and relevant dates, including    | 4-5 |
| 4  |                      |                      | periods of recruitment, exposure, follow-up, and data collection  |     |
| 5  |                      |                      |                                                                   |     |
| 6  |                      |                      |                                                                   |     |
| 7  | Eligibility criteria | <a href="#">#6a</a>  | Give the eligibility criteria, and the sources and methods of     | 4-5 |
| 8  |                      |                      | selection of participants. Describe methods of follow-up.         |     |
| 9  |                      |                      |                                                                   |     |
| 10 |                      |                      |                                                                   |     |
| 11 | Eligibility criteria | <a href="#">#6b</a>  | For matched studies, give matching criteria and number of         | n/a |
| 12 |                      |                      | exposed and unexposed                                             |     |
| 13 |                      |                      |                                                                   |     |
| 14 |                      |                      |                                                                   |     |
| 15 | Variables            | <a href="#">#7</a>   | Clearly define all outcomes, exposures, predictors, potential     | 5   |
| 16 |                      |                      | confounders, and effect modifiers. Give diagnostic criteria, if   |     |
| 17 |                      |                      | applicable                                                        |     |
| 18 |                      |                      |                                                                   |     |
| 19 |                      |                      |                                                                   |     |
| 20 |                      |                      |                                                                   |     |
| 21 | Data sources /       | <a href="#">#8</a>   | For each variable of interest give sources of data and details of | 4-5 |
| 22 | measurement          |                      | methods of assessment (measurement). Describe                     |     |
| 23 |                      |                      | comparability of assessment methods if there is more than one     |     |
| 24 |                      |                      | group. Give information separately for for exposed and            |     |
| 25 |                      |                      | unexposed groups if applicable.                                   |     |
| 26 |                      |                      |                                                                   |     |
| 27 |                      |                      |                                                                   |     |
| 28 |                      |                      |                                                                   |     |
| 29 | Bias                 | <a href="#">#9</a>   | Describe any efforts to address potential sources of bias         | 6   |
| 30 |                      |                      |                                                                   |     |
| 31 |                      |                      |                                                                   |     |
| 32 | Study size           | <a href="#">#10</a>  | Explain how the study size was arrived at                         | 6   |
| 33 |                      |                      |                                                                   |     |
| 34 | Quantitative         | <a href="#">#11</a>  | Explain how quantitative variables were handled in the            | 6   |
| 35 | variables            |                      | analyses. If applicable, describe which groupings were chosen,    |     |
| 36 |                      |                      | and why                                                           |     |
| 37 |                      |                      |                                                                   |     |
| 38 |                      |                      |                                                                   |     |
| 39 |                      |                      |                                                                   |     |
| 40 | Statistical          | <a href="#">#12a</a> | Describe all statistical methods, including those used to control | 6   |
| 41 | methods              |                      | for confounding                                                   |     |
| 42 |                      |                      |                                                                   |     |
| 43 |                      |                      |                                                                   |     |
| 44 | Statistical          | <a href="#">#12b</a> | Describe any methods used to examine subgroups and                | 6   |
| 45 | methods              |                      | interactions                                                      |     |
| 46 |                      |                      |                                                                   |     |
| 47 |                      |                      |                                                                   |     |
| 48 | Statistical          | <a href="#">#12c</a> | Explain how missing data were addressed                           | 5   |
| 49 | methods              |                      |                                                                   |     |
| 50 |                      |                      |                                                                   |     |
| 51 |                      |                      |                                                                   |     |
| 52 | Statistical          | <a href="#">#12d</a> | If applicable, explain how loss to follow-up was addressed        | n/a |
| 53 | methods              |                      |                                                                   |     |
| 54 |                      |                      |                                                                   |     |
| 55 |                      |                      |                                                                   |     |
| 56 | Statistical          | <a href="#">#12e</a> | Describe any sensitivity analyses                                 | 6   |
| 57 | methods              |                      |                                                                   |     |
| 58 |                      |                      |                                                                   |     |
| 59 |                      |                      |                                                                   |     |
| 60 |                      |                      |                                                                   |     |

## Results

|    |                  |                      |                                                                       |
|----|------------------|----------------------|-----------------------------------------------------------------------|
| 1  |                  |                      |                                                                       |
| 2  |                  |                      |                                                                       |
| 3  |                  |                      |                                                                       |
| 4  | Participants     | <a href="#">#13a</a> | Report numbers of individuals at each stage of study—eg 6-7           |
| 5  |                  |                      | numbers potentially eligible, examined for eligibility, confirmed     |
| 6  |                  |                      | eligible, included in the study, completing follow-up, and            |
| 7  |                  |                      | analysed. Give information separately for for exposed and             |
| 8  |                  |                      | unexposed groups if applicable.                                       |
| 9  |                  |                      |                                                                       |
| 10 |                  |                      |                                                                       |
| 11 |                  |                      |                                                                       |
| 12 | Participants     | <a href="#">#13b</a> | Give reasons for non-participation at each stage n/a                  |
| 13 |                  |                      |                                                                       |
| 14 | Participants     | <a href="#">#13c</a> | Consider use of a flow diagram 7                                      |
| 15 |                  |                      |                                                                       |
| 16 |                  |                      |                                                                       |
| 17 | Descriptive data | <a href="#">#14a</a> | Give characteristics of study participants (eg demographic, 7-8       |
| 18 |                  |                      | clinical, social) and information on exposures and potential          |
| 19 |                  |                      | confounders. Give information separately for exposed and              |
| 20 |                  |                      | unexposed groups if applicable.                                       |
| 21 |                  |                      |                                                                       |
| 22 |                  |                      |                                                                       |
| 23 |                  |                      |                                                                       |
| 24 | Descriptive data | <a href="#">#14b</a> | Indicate number of participants with missing data for each 5          |
| 25 |                  |                      | variable of interest                                                  |
| 26 |                  |                      |                                                                       |
| 27 |                  |                      |                                                                       |
| 28 | Descriptive data | <a href="#">#14c</a> | Summarise follow-up time (eg, average and total amount) 5             |
| 29 |                  |                      |                                                                       |
| 30 | Outcome data     | <a href="#">#15</a>  | Report numbers of outcome events or summary measures 6-7              |
| 31 |                  |                      | over time. Give information separately for exposed and                |
| 32 |                  |                      | unexposed groups if applicable.                                       |
| 33 |                  |                      |                                                                       |
| 34 |                  |                      |                                                                       |
| 35 |                  |                      |                                                                       |
| 36 | Main results     | <a href="#">#16a</a> | Give unadjusted estimates and, if applicable, confounder- 6-7         |
| 37 |                  |                      | adjusted estimates and their precision (eg, 95% confidence            |
| 38 |                  |                      | interval). Make clear which confounders were adjusted for and         |
| 39 |                  |                      | why they were included                                                |
| 40 |                  |                      |                                                                       |
| 41 |                  |                      |                                                                       |
| 42 |                  |                      |                                                                       |
| 43 | Main results     | <a href="#">#16b</a> | Report category boundaries when continuous variables were 7           |
| 44 |                  |                      | categorized                                                           |
| 45 |                  |                      |                                                                       |
| 46 |                  |                      |                                                                       |
| 47 | Main results     | <a href="#">#16c</a> | If relevant, consider translating estimates of relative risk into n/a |
| 48 |                  |                      | absolute risk for a meaningful time period                            |
| 49 |                  |                      |                                                                       |
| 50 |                  |                      |                                                                       |
| 51 | Other analyses   | <a href="#">#17</a>  | Report other analyses done—e.g., analyses of subgroups and 7, 9,10    |
| 52 |                  |                      | interactions, and sensitivity analyses                                |
| 53 |                  |                      |                                                                       |

## Discussion

|    |             |                     |                                                                |
|----|-------------|---------------------|----------------------------------------------------------------|
| 54 |             |                     |                                                                |
| 55 |             |                     |                                                                |
| 56 |             |                     |                                                                |
| 57 | Key results | <a href="#">#18</a> | Summarise key results with reference to study objectives 10-11 |
| 58 |             |                     |                                                                |
| 59 |             |                     |                                                                |
| 60 |             |                     |                                                                |

|    |                    |                     |                                                                      |     |
|----|--------------------|---------------------|----------------------------------------------------------------------|-----|
| 1  | Limitations        | <a href="#">#19</a> | Discuss limitations of the study, taking into account sources of     | 12  |
| 2  |                    |                     | potential bias or imprecision. Discuss both direction and            |     |
| 3  |                    |                     | magnitude of any potential bias.                                     |     |
| 4  |                    |                     |                                                                      |     |
| 5  |                    |                     |                                                                      |     |
| 6  | Interpretation     | <a href="#">#20</a> | Give a cautious overall interpretation considering objectives,       | 13  |
| 7  |                    |                     | limitations, multiplicity of analyses, results from similar studies, |     |
| 8  |                    |                     | and other relevant evidence.                                         |     |
| 9  |                    |                     |                                                                      |     |
| 10 |                    |                     |                                                                      |     |
| 11 |                    |                     |                                                                      |     |
| 12 | Generalisability   | <a href="#">#21</a> | Discuss the generalisability (external validity) of the study        | n/a |
| 13 |                    |                     | results                                                              |     |
| 14 |                    |                     |                                                                      |     |
| 15 |                    |                     |                                                                      |     |
| 16 | <b>Other</b>       |                     |                                                                      |     |
| 17 | <b>Information</b> |                     |                                                                      |     |
| 18 |                    |                     |                                                                      |     |
| 19 |                    |                     |                                                                      |     |
| 20 | Funding            | <a href="#">#22</a> | Give the source of funding and the role of the funders for the       | 13  |
| 21 |                    |                     | present study and, if applicable, for the original study on which    |     |
| 22 |                    |                     | the present article is based                                         |     |
| 23 |                    |                     |                                                                      |     |
| 24 |                    |                     |                                                                      |     |

25 The STROBE checklist is distributed under the terms of the Creative Commons Attribution License  
 26 CC-BY. This checklist was completed on 28. July 2019 using <https://www.goodreports.org/>, a tool  
 27 made by the [EQUATOR Network](#) in collaboration with [Penelope.ai](#)  
 28  
 29  
 30  
 31  
 32  
 33  
 34  
 35  
 36  
 37  
 38  
 39  
 40  
 41  
 42  
 43  
 44  
 45  
 46  
 47  
 48  
 49  
 50  
 51  
 52  
 53  
 54  
 55  
 56  
 57  
 58  
 59  
 60



# BMJ Open

## Prevalence of prediabetes and undiagnosed diabetes in the Mollerussa prospective observational cohort study in a semi-rural area of Catalonia

|                               |                                                                                                                                                                                                                                                                                                                                                                                                                                                                                                                                                                                                                                                                                                                                                                                                                                                                                                                                                                                                                                                                                                                                                                                                                                                                                                                                                                                                                                                                                                                                                                                                                                                                                                                                                                                                                                                                                                                                                                                                                                                                                                                                                                                                                                                                                                                                                                                                                                                                                                                                                                                                                        |
|-------------------------------|------------------------------------------------------------------------------------------------------------------------------------------------------------------------------------------------------------------------------------------------------------------------------------------------------------------------------------------------------------------------------------------------------------------------------------------------------------------------------------------------------------------------------------------------------------------------------------------------------------------------------------------------------------------------------------------------------------------------------------------------------------------------------------------------------------------------------------------------------------------------------------------------------------------------------------------------------------------------------------------------------------------------------------------------------------------------------------------------------------------------------------------------------------------------------------------------------------------------------------------------------------------------------------------------------------------------------------------------------------------------------------------------------------------------------------------------------------------------------------------------------------------------------------------------------------------------------------------------------------------------------------------------------------------------------------------------------------------------------------------------------------------------------------------------------------------------------------------------------------------------------------------------------------------------------------------------------------------------------------------------------------------------------------------------------------------------------------------------------------------------------------------------------------------------------------------------------------------------------------------------------------------------------------------------------------------------------------------------------------------------------------------------------------------------------------------------------------------------------------------------------------------------------------------------------------------------------------------------------------------------|
| Journal:                      | <i>BMJ Open</i>                                                                                                                                                                                                                                                                                                                                                                                                                                                                                                                                                                                                                                                                                                                                                                                                                                                                                                                                                                                                                                                                                                                                                                                                                                                                                                                                                                                                                                                                                                                                                                                                                                                                                                                                                                                                                                                                                                                                                                                                                                                                                                                                                                                                                                                                                                                                                                                                                                                                                                                                                                                                        |
| Manuscript ID                 | bmjopen-2019-033332.R2                                                                                                                                                                                                                                                                                                                                                                                                                                                                                                                                                                                                                                                                                                                                                                                                                                                                                                                                                                                                                                                                                                                                                                                                                                                                                                                                                                                                                                                                                                                                                                                                                                                                                                                                                                                                                                                                                                                                                                                                                                                                                                                                                                                                                                                                                                                                                                                                                                                                                                                                                                                                 |
| Article Type:                 | Original research                                                                                                                                                                                                                                                                                                                                                                                                                                                                                                                                                                                                                                                                                                                                                                                                                                                                                                                                                                                                                                                                                                                                                                                                                                                                                                                                                                                                                                                                                                                                                                                                                                                                                                                                                                                                                                                                                                                                                                                                                                                                                                                                                                                                                                                                                                                                                                                                                                                                                                                                                                                                      |
| Date Submitted by the Author: | 05-Dec-2019                                                                                                                                                                                                                                                                                                                                                                                                                                                                                                                                                                                                                                                                                                                                                                                                                                                                                                                                                                                                                                                                                                                                                                                                                                                                                                                                                                                                                                                                                                                                                                                                                                                                                                                                                                                                                                                                                                                                                                                                                                                                                                                                                                                                                                                                                                                                                                                                                                                                                                                                                                                                            |
| Complete List of Authors:     | <p>Falguera, Mireia; Primary Health Care Centre Cervera, Gerència d'Atenció Primària, Institut Català de la Salut; Biomedical Research Institute of Lleida &amp; University of Lleida</p> <p>Vilanova, Maria; Primary Health Care Centre Igualada Nord, Gerència d'Atenció Primària, Institut Català de la Salut; Biomedical Research Institute of Lleida &amp; University of Lleida</p> <p>Alcubierre, Nuria; Department of Nutrition and Dietetics, Avantmedic Granado-Casas, Minerva ; Biomedical Research Institute of Lleida &amp; University of Lleida; Health Sciences Research Institute &amp; University Hospital Germans Trias I Pujol</p> <p>Marsal, Josep Ramón; Unitat de Suport a la Recerca Lleida, Fundació Institut Universitari per a la Recerca a l'Atenció Primària de Salut Jordi Gol i Gurina (IDIAPJGol), &amp; CIBER of Epidemiology and Public Health (CIBERESP); Epidemiology Unit of the Cardiovascular Service, Hospital Universitari Vall d'Hebron</p> <p>Miró, Neus; Primary Health Care Centre Tàrrrega, Gerència d'Atenció Primària, Institut Català de la Salut</p> <p>Cebrian, Cristina; Primary Health Care Centre Mollerussa, Gerència d'Atenció Primària, Institut Català de la Salut</p> <p>Molló, Àngels; Primary Health Care Centre Guissona, Gerència d'Atenció Primària, Institut Català de la Salut</p> <p>Franch-Nadal, Josep; DAP-Cat Group, Unitat de Suport a la Recerca Barcelona, Fundació Institut Universitari per a la Recerca a l'Atenció Primària de Salut Jordi Gol i Gurina (IDIAPJGol), &amp; CIBER on Diabetes and Associated Metabolic Diseases (CIBERDEM); Primary Health Care Centre Raval Sud, Gerència d'Atenció Primària, Institut Català de la Salut</p> <p>Mata-Cases, Manel; DAP-Cat Group, Unitat de Suport a la Recerca Barcelona, Fundació Institut Universitari per a la Recerca a l'Atenció Primària de Salut Jordi Gol i Gurina (IDIAPJGol), &amp; CIBER on Diabetes and Associated Metabolic Diseases (CIBERDEM); Primary Health Care Centre La Mina, Gerència d'Atenció Primària Barcelona, Institut Català de la Salut</p> <p>Castelblanco, Esmeralda; DAP-Cat Group, Unitat de Suport a la Recerca Barcelona, Fundació Institut Universitari per a la Recerca a l'Atenció Primària de Salut Jordi Gol i Gurina (IDIAPJGol); Department of Endocrinology &amp; Nutrition, Hospital de la Santa Creu i Sant Pau &amp; Institut d'Investigació Biomèdica Sant Pau (IIB Sant Pau), &amp; CIBER on Diabetes and Associated Metabolic Diseases (CIBERDEM)</p> <p>Mauricio, Didac ; Department of Endocrinology &amp; Nutrition, Hospital de</p> |

|                                  |                                                                                                                                                                                                                        |
|----------------------------------|------------------------------------------------------------------------------------------------------------------------------------------------------------------------------------------------------------------------|
|                                  | la Santa Creu i Sant Pau & Institut d'Investigació Biomèdica Sant Pau (IIB Sant Pau), & CIBER on Diabetes and Associated Metabolic Diseases (CIBERDEM); Biomedical Research Institute of Lleida & University of Lleida |
| <b>Primary Subject Heading</b> : | Diabetes and endocrinology                                                                                                                                                                                             |
| Secondary Subject Heading:       | Epidemiology                                                                                                                                                                                                           |
| Keywords:                        | Prediabetes, Undiagnosed diabetes, prediabetes prevalence                                                                                                                                                              |
|                                  |                                                                                                                                                                                                                        |

SCHOLARONE™  
Manuscripts



I, the Submitting Author has the right to grant and does grant on behalf of all authors of the Work (as defined in the below author licence), an exclusive licence and/or a non-exclusive licence for contributions from authors who are: i) UK Crown employees; ii) where BMJ has agreed a CC-BY licence shall apply, and/or iii) in accordance with the terms applicable for US Federal Government officers or employees acting as part of their official duties; on a worldwide, perpetual, irrevocable, royalty-free basis to BMJ Publishing Group Ltd ("BMJ") its licensees and where the relevant Journal is co-owned by BMJ to the co-owners of the Journal, to publish the Work in this journal and any other BMJ products and to exploit all rights, as set out in our [licence](#).

The Submitting Author accepts and understands that any supply made under these terms is made by BMJ to the Submitting Author unless you are acting as an employee on behalf of your employer or a postgraduate student of an affiliated institution which is paying any applicable article publishing charge ("APC") for Open Access articles. Where the Submitting Author wishes to make the Work available on an Open Access basis (and intends to pay the relevant APC), the terms of reuse of such Open Access shall be governed by a Creative Commons licence – details of these licences and which [Creative Commons](#) licence will apply to this Work are set out in our licence referred to above.

Other than as permitted in any relevant BMJ Author's Self Archiving Policies, I confirm this Work has not been accepted for publication elsewhere, is not being considered for publication elsewhere and does not duplicate material already published. I confirm all authors consent to publication of this Work and authorise the granting of this licence.

1  
2 **Prevalence of prediabetes and undiagnosed diabetes in the Mollerussa prospective**  
3 **observational cohort study in a semi-rural area of Catalonia**  
4  
5  
6

7 Mireia Falguera<sup>1,2</sup>, Maria Belén Vilanova<sup>2,3</sup>, Nuria Alcubierre<sup>4</sup>, Minerva Granado-Casas<sup>2,5</sup>, Josep  
8 Ramon Marsal<sup>6,7</sup>, Neus Miro<sup>8</sup>, Cristina Cebrian<sup>9</sup>, Àngels Molló<sup>10</sup>, Josep Franch-Nadal<sup>11,12</sup>, Manel  
9 Mata-Cases<sup>11,13</sup>, Esmeralda Castelblanco<sup>11,14</sup>, Didac Mauricio<sup>2,14</sup>  
10  
11  
12  
13

14 <sup>1</sup> Primary Health Care Centre Cervera, Gerència d'Atenció Primària, Institut Català de la Salut,  
15 Cervera, Spain  
16

17 <sup>2</sup> Biomedical Research Institute of Lleida & University of Lleida, Lleida, Spain  
18

19 <sup>3</sup> Primary Health Care Centre Igualada Nord, Gerència d'Atenció Primària, Institut Català de la  
20 Salut, Lleida, Spain  
21

22 <sup>4</sup> Department of Nutrition and Dietetics, Avantmedic, Lleida, Spain  
23

24 <sup>5</sup> Department of Endocrinology & Nutrition, Health Sciences Research Institute & University  
25 Hospital Germans Trias i Pujol, Badalona, Spain  
26

27 <sup>6</sup> Unitat de Suport a la Recerca Lleida, Fundació Institut Universitari per a la Recerca a l'Atenció  
28 Primària de Salut Jordi Gol i Gurina (IDIAPJGol), & CIBER of Epidemiology and Public Health  
29 (CIBERESP), Lleida, Spain  
30

31 <sup>7</sup> Epidemiology Unit of the Cardiovascular Service, Hospital Universitari Vall d'Hebron, Barcelona,  
32 Spain  
33

34 <sup>8</sup> Primary Health Care Centre Tàrrega, Gerència d'Atenció Primària, Institut Català de la Salut,  
35 Lleida, Spain  
36

37 <sup>9</sup> Primary Health Care Centre Mollerussa, Gerència d'Atenció Primària, Institut Català de la Salut,  
38 Lleida, Spain  
39

40 <sup>10</sup> Primary Health Care Centre Guissona, Gerència d'Atenció Primària, Institut Català de la Salut,  
41 Lleida, Spain  
42

43 <sup>11</sup> DAP-Cat Group, Unitat de Suport a la Recerca Barcelona, Fundació Institut Universitari per a la  
44 Recerca a l'Atenció Primària de Salut Jordi Gol i Gurina (IDIAPJGol), & CIBER on Diabetes and  
45 Associated Metabolic Diseases (CIBERDEM), Barcelona, Spain  
46

47 <sup>12</sup> Primary Health Care Centre Raval Sud, Gerència d'Atenció Primària, Institut Català de la Salut,  
48 Barcelona, Spain  
49

50 <sup>13</sup> Primary Health Care Centre La Mina, Gerència d'Atenció Primària Barcelona, Institut Català de la  
51 Salut, Sant Adrià de Besòs, Spain  
52  
53  
54  
55  
56  
57  
58  
59  
60

1  
2 <sup>14</sup> Department of Endocrinology & Nutrition, Hospital de la Santa Creu i Sant Pau & Institut  
3 d'Investigació Biomèdica Sant Pau (IIB Sant Pau), & CIBER on Diabetes and Associated Metabolic  
4 Diseases (CIBERDEM), Barcelona, Spain  
5  
6  
7  
8  
9  
10

### 11 **Corresponding authors**

12 Didac Mauricio

13 Department of Endocrinology & Nutrition; Hospital de la Santa Creu i Sant Pau

14 Sant Quintí, 89, 08041 Barcelona, Spain

15 Tel.: +34 935565661, Fax: +34 935565602

16 E-mail address: didacmauricio@gmail.com  
17  
18  
19  
20  
21  
22

23 Esmeralda Castelblanco

24 Sant Pau Biomedical Research Institute

25 Sant Quintí, 77-79, 08041 Barcelona, Spain

26 Tel.: +34 935565661

27 E-mail address: esmeraldacas@gmail.com  
28  
29  
30  
31  
32  
33  
34  
35  
36  
37  
38  
39  
40  
41  
42  
43  
44

35 Word count: 3556 words

36 Figures: 2 figures and 3 tables  
37  
38  
39  
40  
41  
42  
43  
44

### 42 **ABSTRACT**

45 **Objectives:** To assess the prevalence of undiagnosed diabetes and prediabetes in the healthy  
46 population in the Mollerussa cohort. As a secondary objective, to identify the variables associated  
47 with these conditions and to describe the changes in glycaemic status after one year of follow-up  
48 in subjects with prediabetes.  
49  
50  
51

52 **Design:** Prospective observational cohort study.

53 **Setting:** General population from a semi-rural area.

54 **Participants:** The study included 583 participants without a diagnosis of diabetes recruited  
55 between March 2011 and July 2014.  
56  
57  
58

59 **Results:** The prevalence of undiagnosed diabetes was 20, 3.4% (95% confidence interval 2.6, 4.2)  
60 and that of prediabetes was 229, 39.3% (37.3, 41.3). Among those with prediabetes, 18.3% had

1  
2 isolated impaired fasting plasma glucose (IFPG) (IFPG: 100 to <126 mg/dL), 58.1% had isolated  
3 impaired HbA1c (HbA1c 5.7 - <6.5), and 23.6% fulfilled both criteria. Follow-up data were available  
4 for 166 subjects; 41.6% (37.8, 45.4) returned to normoglycaemia, 57.6% (57.8, 61.4) persisted in  
5 prediabetes, and 0.6% (0, 1.2) progressed to diabetes. Individuals with prediabetes had worse  
6 cardiometabolic risk profiles and sociodemographic features than normoglycaemic subjects. In the  
7 logistic regression model, variables significantly associated with prediabetes were older age (odds  
8 ratio; 95% confidence interval) (1.033; 1.011, 1.056), higher physical activity (0.546; 0.360, 0.827),  
9 body mass index (1.121; 1.029, 1.222), and a family history of diabetes (1.543; 1.025, 2.323). The  
10 variables significantly associated with glycaemic normalization were older age (0.948; 0.916,  
11 0.982) and body mass index (0.779; 0.651, 0.931).

12  
13  
14  
15  
16  
17  
18  
19  
20  
21 **Conclusions:** Among adults in our region, the estimated prevalence of undiagnosed diabetes was  
22 3.4% and that of prediabetes was 39.3%. After a one-year follow-up, a small proportion of subjects  
23 (0.6%) with prediabetes progressed to diabetes, while a high proportion (41.6%) returned to  
24 normoglycaemia. Individuals with prediabetes who returned to normoglycaemia were younger  
25 and had a lower body mass index.

## 30 31 **KEYWORDS**

32  
33 Prediabetes, undiagnosed diabetes, prediabetes prevalence

## 34 35 36 **ARTICLE SUMMARY**

### 37 38 **Strengths and Limitations**

- 39  
40 • This was a population-based study of a small cohort that included a representative sample  
41 of a non-previously studied population of a semi-rural area in Catalonia.
- 42  
43 • We did not perform an oral glucose tolerance test, which is a common test in most studies  
44 but is a time-consuming and expensive procedure.
- 45  
46 • The small number of cases of undiagnosed diabetes precluded further statistical analyses  
47 on this topic.

## 48 49 50 51 52 53 54 **BACKGROUND**

55  
56  
57 Diabetes mellitus, a public health concern with an increasing incidence worldwide, is a great  
58 threat to general health and is leading to increased morbidity and mortality. These effects are  
59 mainly occurring because diabetes is a disorder of glucose metabolism that affects multiple organ  
60

1  
2 systems and is associated with various micro- and macro-vascular complications and several  
3 nonvascular complications. Additionally, a large group of subjects do not fulfil the diabetes criteria  
4 but have intermediate glycaemic variables, between normal and diabetes, and are thus classified  
5 as having prediabetes. One of the most commonly used definitions of prediabetes is that of the  
6 2010 American Diabetes Association (ADA) criteria[1, 2]: (a) impaired fasting plasma glucose (IFG),  
7 defined as fasting plasma glucose (FPG) between 100 and <126 mg/dL (5.6–5.9 mmol/L); (b)  
8 impaired glucose tolerance (IGT), defined as a 2-hour plasma glucose value after a 75 g oral  
9 glucose tolerance test (OGTT) between 140 and <200 mg/dL (7.8–11.0 mmol/L); or (c) glycated  
10 haemoglobin (HbA1c) levels between 5.7% and < 6.5% (39–46 mmol/mol).

11  
12  
13  
14  
15  
16  
17  
18  
19  
20 Prediabetes is becoming increasingly important as it represents a high risk of developing type 2  
21 diabetes (T2D) and cardiovascular diseases.[2, 3] Moreover, individuals with prediabetes are  
22 phenotypically quite similar to patients with T2D. That is, they tend to be older, with a higher body  
23 mass index (BMI) and higher blood pressure than people with normal glucose tolerance; in  
24 addition, they tend to have insulin resistance and dyslipidaemia.[4] Additionally, multiple risk  
25 factors, such as family history, gestational diabetes, and certain ethnicities as well as combined  
26 risk factors such as metabolic syndrome, are known to predispose subjects to a higher risk for  
27 prediabetes and its progression to T2D.[5] Based only on impaired glucose tolerance (IGT), the  
28 worldwide prevalence of prediabetes among adults has been estimated by the International  
29 Diabetes Federation to be 7.3% in 2017, with half of these individuals (49%) being younger than 50  
30 years.[6] The National Diabetes Statistics Report in the United States reported that the total crude  
31 prevalence of diabetes was 9.4% (30.3 million, 2017 US population), with 23.8% undiagnosed and  
32 an additional 33.9% with prediabetes.[7]

33  
34  
35  
36  
37  
38  
39  
40  
41  
42  
43  
44  
45  
46 In Spain, according to data from the Di@bet.es study, based on OGTT, FPG and HbA1c, 13.8% of  
47 the adult population, adjusted for age and sex, had diabetes, and of these individuals up to 6% had  
48 undiagnosed diabetes. Furthermore, an additional 14.8% of individuals presented with some type  
49 of prediabetic state, 3.4% based on IFG, 9.2% based on IGT and 2.2% with disturbances in both,  
50 after adjusting for age and sex.[8, 9] According to the ADA, up to 70% of people with prediabetes  
51 will develop overt diabetes throughout their lives.[10, 11] Moreover, each year, 5-10% of subjects  
52 with prediabetes will eventually develop overt diabetes, and according to some studies, this  
53 percentage can reach up to 18% per year; however, this rate may vary with the definition of  
54 prediabetes and population characteristics.[12-15] It has been shown that over 3-5 years,

1  
2 approximately 25% of subjects progress to T2D, 25% return to a normal state of glucose tolerance  
3 and 50% remain in the prediabetic state.[16] Thus, the early diagnosis and screening of  
4 prediabetes are essential steps towards the prevention of its progression or at least the delay of  
5 the onset of T2D.  
6  
7  
8  
9

10  
11 The primary aim of this study was to assess the prevalence of undiagnosed diabetes and  
12 prediabetes in the healthy population in the Mollerussa cohort. As a secondary objective, we  
13 aimed to assess the variables associated with these conditions and to describe the changes in  
14 glycaemic status after one year of follow-up in subjects with prediabetes.  
15  
16  
17  
18

## 19 20 **METHODS**

### 21 **Subjects**

22  
23 This was a prospective population-based cohort study from the semi-rural area of Mollerussa in  
24 Catalonia (northeast Spain) selected between March 2011 and July 2014. The description of the  
25 cohort and the procedures performed were initially published as a cohort profile.[17] Briefly, the  
26 database of the Catalan Health Institute (ICS) through its Primary Care Electronic Clinical Station  
27 (Estació Clínica Electronica d'Atenció Primaria –eCAP) was used to select the population sample.  
28 All population is passively included in the Primary Care Electronic Clinical record according to the  
29 Spanish health system, which is based on the principles of universality, free access, equity and  
30 fairness of financing.[18] Then, from a total population of 24,666 potentially eligible individuals in  
31 the health-care area (subjects older than 25 years and attending any Primary Healthcare Centre in  
32 the same health area), 2,226 subjects were randomly selected using a randomiser programme  
33 (SPSS software V.16.0 for Windows; SPSS), following the principles of simple random sampling,  
34 and were then invited to participate by telephone contact. Based on their willingness to join the  
35 study, exclusion criteria, consent and baseline laboratory data, 594 subjects aged  $\geq 25$  years were  
36 finally included.[17] The exclusion criteria included a previous diagnosis of diabetes (type 1  
37 diabetes (T1D), T2D or any specific subtype of diabetes), treatment with oral antidiabetic drugs or  
38 the use of metformin for other conditions. In addition, subjects with cardiovascular disease (heart  
39 disease, heart failure, aortic stenosis), cancer, kidney disease, anaemia, hepatitis, gastrointestinal  
40 diseases, recent abdominal surgery, chronic pulmonary obstructive disease, chronic infectious  
41 diseases, use of systemic glucocorticoids or beta blockers or major psychiatric disorders with  
42 psychotic symptoms were excluded from the study. Subjects were considered to have  
43 hypertension or dyslipidaemia if they were using anti-hypertensive or lipid-lowering agents.  
44  
45  
46  
47  
48  
49  
50  
51  
52  
53  
54  
55  
56  
57  
58  
59  
60



1  
2 Prediabetes was defined as any of the following abnormal glycaemic variables: FPG 100 to <126  
3 mg/dL or HbA1c 5.7 to <6.5%; diabetes was defined as FPG >125 mg/dL or HbA1c  $\geq$ 6.5%. Normal  
4 glycaemic status was defined by FPG <100 mg/dL and HbA1c <5.7 according to the 2010 ADA  
5 criteria.[1] Eleven subjects without baseline HbA1c or FPG measurements were excluded. Subjects  
6 with prediabetes at baseline (n=229) underwent a second visit 12 months after the baseline visit,  
7 and 166 (72.5%) of them had relevant information at follow up.  
8

9  
10 A fasting blood sample was taken to determine glucose, HbA1c, total cholesterol, HDL-cholesterol,  
11 LDL-cholesterol, triglycerides, renal function, and other parameters following standard  
12 protocols.[17] The fatty liver index (FLI) was calculated with the equation developed by Bedogni *et*  
13 *al.* [19] Insulin resistance was calculated by the homeostatic model assessment (HOMA2-IR); beta  
14 cell function (HOMA2- $\beta$ ) and insulin sensitivity (HOMA2-S) data were calculated with a HOMA2  
15 calculator released by the Diabetes Trials Unit, University of Oxford: HOMA Calculator. This  
16 calculator is available at: <http://www.dtu.ox.ac.uk/homacalculator/> (updated October 11, 2017).  
17 [20] The estimated glomerular filtration rate (eGFR) was calculated with the Chronic Kidney  
18 Disease Epidemiology Collaboration equation.[21]  
19

20 Sociodemographic variables were recorded by researchers following a protocol for the inclusion of  
21 patients using a standardized baseline questionnaire during the clinical interview. In all cases a  
22 physical examination (including weight, height, blood pressure and waist circumference) was  
23 carried out by trained research staff. Education level and physical activity were assessed according  
24 to the International Standard Classification of Education[22] and the Spanish-validated  
25 International Physical Activity Questionnaire,[23] respectively. We classified the education level as  
26 low level (studied until primary school) and high level (secondary high school education or higher).  
27 Physical activity was classified as sedentary or active (not regularly versus regularly active).  
28

### 29 **Ethical approval**

30 The study protocol was approved by the Ethics Committee of the Primary Health Care University  
31 Research Institute (IDIAP) Jordi Gol (P12/043) and was conducted following the Declaration of  
32 Helsinki. All study participants signed an informed consent form.  
33

### 34 **Sample size**

35 The sample size was determined based on an estimated prediabetes prevalence of 35.5% and 38%  
36 using HbA1c levels and the 2010 ADA criteria, respectively.[1, 24, 25] It was estimated that a  
37 random sample of 505 subjects was sufficient to assess an estimated prevalence of approximately  
38 30% with a 95% CI and an error of  $\pm$ 4%.[17]  
39

### 40 **Statistical methods**

1  
2 Descriptive statistics of the mean (standard deviation) or median [interquartile range] were  
3  
4 estimated for quantitative variables with a normal or non-normal distribution, respectively.  
5  
6 Qualitative variables were assessed using absolute and relative frequencies. Normally distributed  
7  
8 data were analysed using the Shapiro-Wilk test. Comparisons between groups of all variables were  
9  
10 performed to evaluate the differences. Student's t-test, ANOVA, the Mann-Whitney test, or the  
11  
12 Kruskal-Wallis test were used to assess the differences between groups. The chi-squared test or  
13  
14 Fisher's exact test were used to determine differences in qualitative variables. Tukey's correction  
15  
16 was applied to account for multiple tests. Multivariate logistic regression models were used to  
17  
18 determine the association of variables with prediabetes, isolated FPG, isolated HbA1c and both  
19  
20 FPG and HbA1c at baseline with covariables that were clinically or statistically associated. In the  
21  
22 prediabetes model, the variables used were age, sex, education level, physical activity, DLP, HT,  
23  
24 family history of diabetes, BMI, waist, glomerular filtration rate and fatty liver index. A stepwise  
25  
26 method with selection of variables by backward elimination was used to build the final logistic  
27  
28 regression model to predicts the normalization of the glycaemic state; in all models, the goodness-  
29  
30 of-fit assumption was tested by the Hosmer-Lemeshow test. The predictive accuracy of the logistic  
31  
32 regression model for normalization was checked by receiver-operating characteristic (ROC) curves  
33  
34 and the area under the ROC curve ( $AUC_{ROC}$ ). Odds ratios with corresponding 95% confidence  
35  
36 intervals are shown, and statistical significance was established as a p-value <0.05. Data  
37  
38 management and all analyses were performed using R statistical software, version 3.3.1, and SPSS  
39  
40 software (version 22, IBM, SPSS, Chicago, Illinois, USA).

### 41 **Patient and Public Involvement**

42 This research was done without patient involvement. Patients were not invited to comment on  
43  
44 the study design and were not consulted to develop patient relevant outcomes or interpret the  
45  
46 results. Patients were not invited to contribute to the writing or editing of this document for  
47  
48 readability or accuracy.

### 49 **RESULTS**

50  
51 Out of the 594 individuals recruited, complete data on FPG and HbA1c were available from 583  
52  
53 (98.1%). The prevalence of undiagnosed diabetes was 20 subjects, 3.4% (95% confidence interval:  
54  
55 2.7, 4.2), and the prevalence of prediabetes was 229 subjects, 39.3% (37.3, 41.3). Furthermore,  
56  
57 the prevalence based on isolated FPG was 7.2%, and that based on isolated HbA1c was 22.8%,  
58  
59 while based on the criteria of both FPG and HbA1c, the prevalence was 9.3% (Figure 1).  
60

The differences of clinical and sociodemographic characteristics between normoglycaemic with prediabetic and diabetic groups are shown in Table 1. Except for sex, family history of diabetes, current smoking status, alcohol consumption status, triglycerides and high density lipoprotein (HDL)-cholesterol levels, there were significant differences in the majority of parameters, including age and BMI, between the three groups.

We observed an association in age, BMI, waist circumference, systolic and diastolic blood pressure (SBP and DBP), alcohol consumption status, hypertension, dyslipidaemia, triglycerides, total cholesterol, low density lipoprotein (LDL)-cholesterol, insulin test, FLI, and HOMA2-IR, which were higher in individuals with prediabetes than in individuals with normoglycaemia and were higher in the diabetic group than in the prediabetic group. On the other hand, physical activity, education level, eGFR, HOMA2- $\beta$  and HOMA2-S exhibited a negative trend between the same groups. In the prediabetic group, 41.9% had impaired FPG and 81.7% had impaired HbA1c. On the other hand, among the newly identified diabetic subjects, up to 80% met the FPG criteria and 85% met the HbA1c criteria. The prevalence of prediabetes increased with increasing age, with percentages of 17.4%, 28.6%, 46.4%, 50 and 52.9% in participants aged <35 years, 36-45 years, 46-55 years, 56-65 years and >65 years, respectively. Regarding BMI categories of normal weight (BMI <25 kg/m<sup>2</sup>), overweight (BMI 25-29.9 kg/m<sup>2</sup>), and obese (BMI>30 kg/m<sup>2</sup>), the prevalence of prediabetes was 29%, 45.9%, and 49%, respectively (Supplementary file 1 Figure 1).

**Table 1.** Clinical and sociodemographic differences among glycaemic status groups of the Mollerussa cohort.

|                        | Normoglycaemia<br>FPG <100 mg/dL<br>and HbA1c <5.7% | Prediabetes<br>FPG 100 to 125 mg/dL,<br>or HbA1c 5.7 to 6.4% | Diabetes<br>FPG >125 mg/dL<br>or HbA1c $\geq$ 6.5% | Mean difference NG<br>vs. PD (95% CI) | Mean difference NG<br>vs. DM (95% CI) |
|------------------------|-----------------------------------------------------|--------------------------------------------------------------|----------------------------------------------------|---------------------------------------|---------------------------------------|
| N                      | 334                                                 | 229                                                          | 20                                                 | -                                     | -                                     |
| Sex, women             | 193 (57.8%)                                         | 135 (59.0%)                                                  | 13 (65.0%)                                         | 1.2 (-7.1, 9.4)                       | 7.2 (-14.3, 28.8)                     |
| Age, years             | 47.1 (12.8)                                         | 54.6 (12.3)                                                  | 61.2 (13.6)                                        | 7.5 (5.4, 9.6)                        | 14.2 (8.4, 19.9)                      |
| BMI, Kg/m <sup>2</sup> | 25.3 (4.27)                                         | 27.5 (4.75)                                                  | 30.2 (5.48)                                        | 2.1 (1.4, 2.9)                        | 4.9 (2.9, 6.9)                        |
| BMI categories         |                                                     |                                                              |                                                    |                                       |                                       |
| Normal weight          | 160 (50.0%)                                         | 67 (30.2%)                                                   | 4 (20.0%)                                          | -18.6 (-26.6, -10.7)                  | -27.9 (-46.2, -9.6)                   |
| Overweight             | 120 (37.5%)                                         | 106 (47.7%)                                                  | 5 (25.0%)                                          | 10.4 (2.1, 18.6)                      | -10.9 (-30.6, 8.7)                    |
| Obesity                | 40 (12.5%)                                          | 49 (22.1%)                                                   | 11 (55.0%)                                         | 9.4 (3.1, 15.8)                       | 43.0 (20.9, 65.1)                     |
| Waist, cm              | 91.9 (11.9)                                         | 97.0 (12.3)                                                  | 101 (16.8)                                         | 5.1 (2.9, 7.2)                        | 9.3 (3.8, 14.9)                       |
| SBP, mm Hg             | 119 (16.3)                                          | 126 (16.6)                                                   | 130 (18.6)                                         | 6.7 (3.9, 9.5)                        | 10.9 (3.5, 18.5)                      |
| DBP, mm Hg             | 75.7 (10.0)                                         | 78.2 (9.88)                                                  | 78.0 (9.24)                                        | 2.5 (0.8, 4.2)                        | 2.3 (-2.2, 6.8)                       |
| Hypertension           | 37 (11.1%)                                          | 49 (21.4%)                                                   | 9 (45.0%)                                          | 10.3 (4.0, 16.6)                      | 33.9 (11.9, 55.9)                     |
| Dyslipidaemia          | 27 (8.08%)                                          | 39 (17.0%)                                                   | 5 (25.0%)                                          | 8.9 (3.2, 14.6)                       | 16.9 (-2.3, 36.1)                     |

|    |                                |             |             |             |                      |                      |
|----|--------------------------------|-------------|-------------|-------------|----------------------|----------------------|
| 1  |                                |             |             |             |                      |                      |
| 2  | Family history DM              | 94 (29.6%)  | 78 (37.0%)  | 8 (42.1%)   | 5.9 (-1.9, 13.7)     | 11.8 (-10.1, 33.9)   |
| 3  | Education, high level          | 265 (82.6%) | 145 (65.0%) | 11 (55.0%)  | -16.0 (-23.6, -8.4)  | -24.3 (-46.6, -2.1)  |
| 4  | Physical activity              | 243 (75.9%) | 141 (63.2%) | 10 (50.0%)  | -11.2 (-19.1, -3.3)  | -22.7 (-45.2, -0.3)  |
| 5  | Current smoker                 | 82 (24.6%)  | 63 (27.5%)  | 3 (15.0%)   | 3.0 (-4.4, 10.4)     | -9.5 (-25.9, 6.8)    |
| 6  | Alcohol, g/day                 | 8.33 (13.9) | 12.3 (21.3) | 10.6 (17.2) | 4.0 (0.9, 6.9)       | 2.2 (-5.8, 10.3)     |
| 7  | FPG, mg/dL                     | 86.6 (7.04) | 97.0 (11.2) | 119 (15.2)  | 10.4 (8.8, 11.9)     | 32.6 (28.4, 36.8)    |
| 8  | HbA1c, %                       | 5.25 (0.26) | 5.80 (0.29) | 6.26 (0.54) | 0.6 (0.5, 0.6)       | 1.0 (0.9, 1.1)       |
| 9  | HbA1c, mmol/mol                | 33.8 (2.81) | 39.9 (3.12) | 45.0 (5.92) | 6.1 (5.6, 6.6)       | 11.1 (9.7, 12.5)     |
| 10 | eGFR mL/min/1.73m <sup>2</sup> | 96.6 (14.1) | 90.4 (15.9) | 85.5 (18.1) | -6.2 (-8.7, -3.7)    | -11.2 (-17.9, -4.4)  |
| 11 | Triglycerides, mg/dL           | 104 (90.0)  | 111 (63.2)  | 116 (47.3)  | 6.6 (-6.8, 19.9)     | 11.2 (-24.7, 47.1)   |
| 12 | T-cholesterol, g/dL            | 197 (38.2)  | 205 (32.4)  | 214 (31.1)  | 7.9 (1.9, 14.0)      | 16.9 (0.7, 33.1)     |
| 13 | HDL, mg/dL                     | 58.7 (15.0) | 58.8 (14.3) | 64.6 (17.6) | 0.1 (-2.4, 2.6)      | 5.9 (-0.86, 12.6)    |
| 14 | LDL, mg/dL                     | 119 (31.4)  | 125 (29.4)  | 126 (27.7)  | 6.3 (1.1, 11.4)      | 7.5 (-6.3, 21.4)     |
| 15 | Insulin, $\mu$ U/mL            | 7.99 (3.78) | 10.1 (5.46) | 16.2 (17.1) | 2.1 (1.2, 3.0)       | 8.2 (5.8, 10.7)      |
| 16 | Fatty Liver Index              | 34.0 (26.9) | 44.3 (28.6) | 59.4 (33.0) | 10.3 (5.5, 15.0)     | 25.4 (12.8, 38.0)    |
| 17 | HOMA2- $\beta$                 | 104 (31.8)  | 97.7 (31.9) | 89.0 (48.4) | -6.3 (-11.8, -0.8)   | -14.9 (-29.7, -0.2)  |
| 18 | HOMA2-S                        | 118 (52.1)  | 94.0 (43.4) | 63.3 (26.7) | -23.8 (-32.0, -15.6) | -54.4 (-76.3, -32.6) |
| 19 | HOMA2-IR                       | 1.03 (0.48) | 1.33 (0.72) | 2.16 (2.08) | 0.3 (0.2, 0.4)       | 1.1 (0.8, 1.4)       |

25 Mean (SD) and n (%). NG, normoglycaemia; PD, prediabetes; DM, diabetes; BMI, body mass index; SBP, systolic blood  
 26 pressure; DBP, diastolic blood pressure; FPG, fasting plasma glucose; eGFR, estimated glomerular filtration rate; T-  
 27 cholesterol, total cholesterol; HDL, high-density lipoprotein cholesterol; LDL, low-density lipoprotein cholesterol;  
 28 HOMA2-IR, Homeostatic Model Assessment-2\_Insulin Resistance; HOMA2- $\beta$ , Homeostatic Model Assessment-2 Beta  
 29 cell function; HOMA2-S, Homeostatic Model Assessment-2 Insulin Sensitivity.

30  
 31  
 32  
 33  
 34  
 35 Table 2 shows the characteristics of prediabetic individuals by glycaemic state: isolated FPG,  
 36 isolated HbA1c and both altered FPG and HbA1c. Thus, among the 229 subjects with prediabetes,  
 37 42 (18.3%) had abnormal isolated FPG, 133 (58.1%) had abnormal isolated HbA1c, and 54 (23.6%)  
 38 had both abnormal FPG and HbA1c. Patients with both abnormal FPG and HbA1c were older, had  
 39 larger waist circumferences, had increased FLI and HOMA2-IR, were more likely to be overweight  
 40 or obese and have hypertension, and had lower HOMA2-S. The isolated FPG group had a higher  
 41 proportion of subjects with a family history of diabetes, higher alcohol consumption, higher levels  
 42 of total cholesterol and LDL-cholesterol and lower levels of HDL-cholesterol, although none of  
 43 these differences were statistically significant. Finally, the isolated HbA1c group had an elevated  
 44 HOMA2- $\beta$ . Although there were no statistically significant differences, the proportion of men was  
 45 higher in the isolated FPG group, whereas the proportion of women was higher in the isolated  
 46 HbA1c and both FPG and HbA1c groups. Among the three groups, no statistically significant  
 47 differences were found regarding the following variables: sex, dyslipidaemia, family history of  
 48 diabetes, education level, physical activity, current smoking status, alcohol consumption,  
 49 triglycerides, total cholesterol, HDL-cholesterol or LDL-cholesterol.  
 50  
 51  
 52  
 53  
 54  
 55  
 56  
 57  
 58  
 59  
 60

**Table 2.** Clinical and sociodemographic characteristics by glycaemic status of the individuals with prediabetes.

|                                 | Impaired HbA1c<br>5.7%-6.4% | Impaired FPG<br>100-125 mg/dL | HbA1c 5.7%-<br>6.4% and FPG<br>100-125 mg/dL | <i>p</i><br>overall | <i>p</i> HbA1c<br>vs. FPG | <i>p</i> HbA1c<br>vs. Both | <i>p</i> . FPG<br>vs. Both |
|---------------------------------|-----------------------------|-------------------------------|----------------------------------------------|---------------------|---------------------------|----------------------------|----------------------------|
| N                               | 133                         | 42                            | 54                                           | -                   | -                         | -                          | -                          |
| Sex, Women                      | 84 (63.2%)                  | 19 (45.2%)                    | 32 (59.3%)                                   | 0.12                | 0.181                     | 0.74                       | 0.369                      |
| Age, years                      | 53.4 (12.4)                 | 50.6 (11.8)                   | 60.6 (10.5)                                  | <b>&lt;0.001</b>    | 0.388                     | <b>0.001</b>               | <b>&lt;0.001</b>           |
| BMI, Kg/m <sup>2</sup>          | 25.8 [24.5;28.9]            | 27.8 [24.5;30.6]              | 27.5 [25.6;30.5]                             | 0.056               | 0.534                     | <b>0.036</b>               | 0.534                      |
| BMI categories                  |                             |                               |                                              | <b>0.018</b>        | 0.107                     | <b>0.05</b>                | <b>0.032</b>               |
| Normal weight                   | 43 (33.1%)                  | 16 (41.0%)                    | 8 (15.1%)                                    |                     |                           |                            |                            |
| Overweight                      | 64 (49.2%)                  | 12 (30.8%)                    | 30 (56.6%)                                   |                     |                           |                            |                            |
| Obesity                         | 23 (17.7%)                  | 11 (28.2%)                    | 15 (28.3%)                                   |                     |                           |                            |                            |
| Waist, cm                       | 95.0 [88.0;102]             | 98.0 [90.0;106]               | 101 [95.0;107]                               | <b>0.008</b>        | 0.232                     | <b>0.006</b>               | 0.333                      |
| SBP, mm Hg                      | 124 (16.1)                  | 129 (15.5)                    | 128 (18.4)                                   | 0.169               | 0.296                     | 0.29                       | 0.991                      |
| DBP, mm Hg                      | 78.0 (9.44)                 | 79.5 (12.0)                   | 77.9 (9.39)                                  | 0.674               | 0.675                     | 0.999                      | 0.723                      |
| Hypertension                    | 21 (15.8%)                  | 9 (21.4%)                     | 19 (35.2%)                                   | <b>0.014</b>        | 0.542                     | <b>0.019</b>               | 0.32                       |
| Dyslipidaemia                   | 25 (18.8%)                  | 4 (9.52%)                     | 10 (18.5%)                                   | 0.358               | 0.515                     | 1                          | 0.515                      |
| Family history DM               | 43 (34.1%)                  | 18 (48.6%)                    | 17 (35.4%)                                   | 0.265               | 0.471                     | 1                          | 0.471                      |
| Education, high level           | 91 (69.5%)                  | 23 (59.0%)                    | 31 (58.5%)                                   | 0.252               | 0.455                     | 0.455                      | 1                          |
| Physical activity               | 88 (67.2%)                  | 21 (53.8%)                    | 32 (60.4%)                                   | 0.281               | 0.547                     | 0.68                       | 0.68                       |
| Current smoker                  | 38 (28.6%)                  | 14 (33.3%)                    | 11 (20.4%)                                   | 0.338               | 0.693                     | 0.496                      | 0.496                      |
| Alcohol, g/day                  | 2.92 [0.00;15.2]            | 7.42 [0.90;16.3]              | 1.53 [0.00;17.9]                             | 0.369               | 0.336                     | 0.735                      | 0.336                      |
| FPG, mg/dL                      | 89.2 (6.89)                 | 106 (4.97)                    | 109 (5.96)                                   | <b>&lt;0.001</b>    | <b>&lt;0.001</b>          | <b>&lt;0.001</b>           | 0.14                       |
| HbA1c, %                        | 5.80 [5.70;6.00]            | 5.40 [5.40;5.57]              | 5.95 [5.80;6.10]                             | <b>&lt;0.001</b>    | <b>&lt;0.001</b>          | <b>&lt;0.001</b>           | <b>&lt;0.001</b>           |
| HbA1c, mmol/mol                 | 39.9 [38.8;42.1]            | 35.5 [34.7;37.4]              | 41.5 [39.9;43.2]                             | <b>&lt;0.001</b>    | <b>&lt;0.001</b>          | <b>&lt;0.001</b>           | <b>&lt;0.001</b>           |
| eGFR, mL/min/1.73m <sup>2</sup> | 93.6 [79.6;103]             | 93.2 [79.7;107]               | 89.3 [73.1;97.2]                             | 0.076               | 0.556                     | 0.073                      | 0.073                      |
| Triglycerides, mg/dL            | 88.0 [72.0;134]             | 86.5 [67.0;130]               | 106 [74.5;132]                               | 0.332               | 0.729                     | 0.304                      | 0.304                      |
| Total cholesterol, mg/dL        | 205 (34.5)                  | 209 (28.6)                    | 203 (29.8)                                   | 0.689               | 0.767                     | 0.947                      | 0.677                      |
| HDL-cholesterol, mg/dL          | 58.0 [51.0;69.0]            | 52.0 [45.0;65.8]              | 57.0 [51.0;66.0]                             | 0.128               | 0.141                     | 0.755                      | 0.18                       |
| LDL-cholesterol, mg/dL          | 125 (32.2)                  | 133 (25.5)                    | 120 (23.5)                                   | 0.114               | 0.278                     | 0.593                      | 0.096                      |
| Insulin, µU/mL                  | 8.00 [6.10;10.0]            | 9.90 [6.90;15.9]              | 10.9 [7.90;15.6]                             | <b>&lt;0.001</b>    | <b>0.01</b>               | <b>&lt;0.001</b>           | 0.577                      |
| Fatty Liver Index               | 34.4 [16.9;59.2]            | 42.2 [17.7;73.6]              | 53.8 [32.2;73.0]                             | <b>0.016</b>        | 0.373                     | <b>0.011</b>               | 0.378                      |
| HOMA2-β                         | 96.6 [81.5;122]             | 81.7 [64.5;118]               | 82.8 [63.0;108]                              | <b>0.001</b>        | <b>0.034</b>              | <b>0.002</b>               | 0.693                      |
| HOMA2-S                         | 98.0 [77.2;127]             | 75.0 [47.2;107]               | 67.5 [47.5;91.3]                             | <b>&lt;0.001</b>    | <b>0.003</b>              | <b>&lt;0.001</b>           | 0.564                      |
| HOMA2-IR                        | 1.00 [0.80;1.30]            | 1.30 [0.90;2.15]              | 1.50 [1.10;2.10]                             | <b>&lt;0.001</b>    | <b>0.005</b>              | <b>&lt;0.001</b>           | 0.545                      |

Significant values are shown in bold. Mean (SD), median [interquartile range] and n (%). BMI, body mass index; SBP, systolic blood pressure; DBP, diastolic blood pressure; DM, diabetes; FPG, fasting plasma glucose; eGFR, estimated glomerular filtration rate; HDL, high-density lipoprotein; LDL, low-density lipoprotein; HOMA2-IR, Homeostatic Model Assessment-2\_Insulin Resistance; HOMA2-β, Homeostatic Model Assessment-2 Beta cell function; HOMA2-S, Homeostatic Model Assessment-2 Insulin Sensitivity.

### Prediabetes follow-up

Of the 229 individuals with prediabetes at baseline, 166 (72.5%) had clinical and laboratory data after 12 months of follow-up. Of them, 52 (41.6%) returned to a normal glycaemic status, 112

(57.6%) persisted in their state of prediabetes, and only 2 (0.6%) progressed to diabetes. Table 3 shows the outcome of the follow-up of the isolated FPG, HbA1c and both FPG and HbA1c groups.

**Table 3.** Outcomes at follow-up of patients with different altered glucose metabolism statuses at baseline.

| Variables      | Baseline    | N with follow-up | Follow up  |             |            |
|----------------|-------------|------------------|------------|-------------|------------|
|                |             |                  | Normalized | Persisted   | Progressed |
| Prediabetes    | 229 (39.3%) | 166 (90.7%)      | 52 (41.6%) | 112 (57.8%) | 2 (0.6%)   |
| Isolated FPG   | 42 (7.2%)   | 3 (1.8%)         | 1 (33.3%)  | 1 (33.3%)   | 1 (33.3%)  |
| Isolated HbA1c | 133 (22.8%) | 114 (68.7%)      | 47 (41.3%) | 67 (58.7%)  | 0 (0%)     |
| Both altered   | 54 (9.3%)   | 49 (29.5%)       | 4 (8.2%)   | 44 (89.8%)  | 1 (2%)     |

FPG, fasting plasma glucose

### Association of prediabetes with glycaemic status

The multivariate logistic regression model of prediabetes *versus* normoglycaemia showed that the variables associated with prediabetes were older age (odds ratio; 95% confidence interval) (1.033; 1.011, 1.056), higher physical activity levels (0.546; 0.360, 0.827), higher BMI (1.121; 1.029, 1.222), and a family history of diabetes (1.543; 1.025, 2.323) (Figure 2a). The models for isolated FPG alterations, isolated HbA1c alterations and both FPG and HbA1c alterations are shown in Supplementary file 2 Tables 1, 2 and 3, respectively. The variables associated with isolated FPG were older age (1.032; 1.008, 1.057), higher physical activity levels (0.535; 0.318, 0.899), and a family history of diabetes (1.798; 1.067, 3.028). On the other hand, the only variable associated with impaired HbA1c was older age (1.048; 1.029, 1.067). Finally, in the model for altered FPG and HbA1c, the variables associated were older age (1.056; 1.026, 1.086) and high FLI (1.031; 1.002, 1.061).

### Prediction of normalization

Logistic regression model, as described in the methods section, starting with the variables age, sex, waist circumference, BMI, hypertension, physical activity, family history of diabetes, education level, total cholesterol, HDL-cholesterol, FLI and HOMA2-IR, was performed to identify factors independently associated with the prediction of glycaemic status normalization (Supplementary file 2 Table 4). The variables that predicted glycaemic normalization were older age (0.948; 0.916, 0.982) and BMI (0.779; 0.651, 0.931) (Figure 2b); this model had a good predictive ability (AUC<sub>ROC</sub> 0.77;  $p < 0.001$ ) (Supplementary file 3 Figure 2).

## DISCUSSION

We found that the prevalence of undiagnosed diabetes was 3.4%, and the prevalence of prediabetes was 39.3% in this semi-rural population in Catalonia (northeast Spain). The prevalence of prediabetes was three-fold higher based on HbA1c than that based on FPG. Subjects with prediabetes defined by both HbA1c and FPG criteria had unfavourable clinical and sociodemographic profiles related to increased cardiovascular risk. These factors were older age; abdominal obesity; higher triglycerides; increased FLI; and a higher proportion of overweight, obesity and hypertension. In our population, age was the variable most strongly associated with prediabetes based on all specific glycaemic status variables: isolated impaired FPG, isolated impaired HbA1c or both impaired FPG and HbA1c. Other variables associated with prediabetes were lower physical activity levels, a family history of diabetes, and obesity. Finally, the characteristics related to normalization at follow-up were younger age and lower BMI.

The prevalence of prediabetes and undiagnosed diabetes in our healthy population were within the ranges found in other population studies defining prediabetes based on the 2010 ADA criteria, using FPG and/or HbA1c. Among these studies, a large national Chinese study (with 170,287 subjects) showed a prevalence of prediabetes of 35.7% and a prevalence of undiagnosed diabetes of 6.9%.<sup>[26]</sup> In a study of the Caribbean population, the corresponding figures were 44.1% for prediabetes and 7.3% for undiagnosed diabetes.<sup>[27]</sup> In England, based on HbA1c levels, the prediabetes prevalence was 35.5% in the adult population in 2011.<sup>[24]</sup> In these studies, the prevalence of prediabetes was higher in older, overweight and obese participants.<sup>[24, 26, 27]</sup> Many other studies found this relationship of age and obesity with the risk and incidence of diabetes.<sup>[28-31]</sup>

In the 1999-2002 National Health and Nutrition Examination Survey (NHANES), the prevalence of undiagnosed diabetes was 2.8%, and up to 26% of the participants had IFG.<sup>[32]</sup> However, the age-standardized prevalence of prediabetes based on HbA1c and FPG combined was similar in the periods between 1999 and 2002 and 2003 and 2006 at 29.2% and 29.3%, respectively, but increased significantly to 36.2% in the period between 2007 and 2010.<sup>[33]</sup> This prevalence continued to increase to as high as 38% in 2012 among adults from the USA.<sup>[25]</sup> The change in the prevalence of prediabetes over time occurred because of a significant change in elevated HbA1c, whereas the prevalence based on elevated FPG was similar over this period.<sup>[33]</sup> Thus, in

1  
2 our population, as in the NHANES study, HbA1c was the most significant contributor  
3 to prediabetes prevalence, followed by FPG, which is in concordance with the findings in the  
4 Caribbean population[27] and discordant with the reports from the NHANES study between 2011  
5 and 2014 in which they reported that FPG was the most significant contributor to prediabetes  
6 prevalence followed by HbA1c.[34] Our results show that individuals with isolated impaired  
7 HbA1c when diagnosed with prediabetes might have a slightly better cardiometabolic risk profile  
8 than those with isolated FPG, while those individuals with both impaired FPG and HbA1c had the  
9 worst CV risk. These results are in line with the findings of the prospective observational study in  
10 the primary care setting of a Spanish cohort with prediabetes (PREDAPS) of our group.[35, 36]  
11  
12  
13  
14  
15  
16  
17  
18  
19

20 Additionally, two meta-analyses found that among individuals with prediabetes based on the ADA  
21 criteria, all-cause and CVD mortality were increased[37] and that the risk of cardiovascular disease  
22 increased independently of the glucose assessment in comparison to the risk of normoglycaemic  
23 subjects.[38] Moreover, a recent study concluded that those who returned to normoglycaemia  
24 from FPG- or HbA1c-defined prediabetes were not at reduced risk of future CVD or death.[39]  
25 Studies of shorter duration, over 3-5 years, have shown that approximately 25% of subjects  
26 progress to diabetes, 25% return to a normal state of glucose tolerance and 50% remain in the  
27 prediabetic state;[16] after 1 year, 18.8% of subjects with prediabetes returned to  
28 normoglycaemia and approximately 30% with abnormal FPG, 29.1% with abnormal HbA1c and  
29 7.6% with abnormalities in both FPG and HbA1c returned to a normal state of glucose  
30 tolerance.[40] In our findings from a one-year follow-up, the rate of reversion from prediabetes to  
31 normoglycaemia was approximately 40%, and approximately 60% of participants remained in the  
32 prediabetic state. On the other hand, lifestyle modifications, such as weight loss and increased  
33 physical activity, among other factors associated with prediabetes, reduced the risk of diabetes  
34 among these subjects.[13, 41] According to these reports, in our study, lower BMI was a factor  
35 that was independently associated with the normalization of the glycaemic state, and an active  
36 lifestyle decreased the risk of having prediabetes.  
37  
38  
39  
40  
41  
42  
43  
44  
45  
46  
47  
48  
49  
50  
51

52  
53 The results of this study need to be interpreted in light of its strengths and weaknesses. First, the  
54 number of participants in our study is smaller in comparison to other studies. In addition, the  
55 study may not be representative of urban areas in our region. Thus, the results may not be  
56 generalizable to other territories with different population characteristics in our country.  
57 However, the Mollerussa cohort is a representative sample of the region, which is a specific semi-  
58  
59  
60



1  
2 rural area that has never been specifically investigated. Second, our study sample is probably  
3 healthier than the general population, as we excluded subjects with already known diabetes and  
4 other comorbidities, a lower number of subjects were counted in the denominator, thus resulting  
5 in a higher prevalence of this condition. Third, we did not assess glucose tolerance through an oral  
6 glucose tolerance test, which is common in most population studies. Although this assay is  
7 sensitive, it is also less specific for identifying subjects who could develop diabetes.[42]  
8 Furthermore, the oral glucose tolerance test has a low reproducibility and is a rather time-  
9 consuming and expensive procedure.[9, 43] Conversely, HbA1c and FPG are cost-effective and  
10 more convenient for patients. Currently, FPG is an accepted screening method to detect diabetes  
11 and prediabetes. HbA1c improves the sensitivity of FPG in the detection of early T2D in high-risk  
12 subjects[32, 44] and is a better predictor of CV events than FPG.[45] Fourth, we only followed up  
13 those participants with prediabetes. Thus, we could not analyse the probability of changing from  
14 normoglycaemia to prediabetes or diabetes in this study. Finally, it is probable that the use of the  
15 World Health Organization prediabetes criteria in our study would have resulted in a smaller  
16 proportion of subjects who returned to a normal glycaemic state. The World Health Organization  
17 established a normal concentration of FPG between 110 and <126 mg/dl.[46]

## 31 32 33 **Conclusions**

34 For the first time, our study provides information on the prevalence of diabetes and prediabetes in  
35 the Mollerussa health care area, a Mediterranean semi-rural area in northeast Spain. Individuals  
36 with prediabetes had a more unfavourable cardiometabolic risk profile than normoglycaemic  
37 subjects. Moreover, individuals with abnormalities in both criteria used to diagnose prediabetes  
38 had the worst risk profile. Finally, after one year of follow-up, few people progressed to diabetes,  
39 while more than 40% returned to a normal glycaemic state, and nearly 60% persisted in the  
40 prediabetic state. These results suggest that the use of both FPG and HbA1c criteria in clinical  
41 practice could help identify people with high diabetes and cardiovascular risk. Moreover, the  
42 identification of individuals with prediabetes provides an opportunity for intervention through  
43 lifestyle modification and pharmacological treatments not only to reduce the development of  
44 diabetes.

45  
46  
47  
48  
49  
50  
51  
52  
53  
54  
55  
56  
57 **Acknowledgements** The authors thank Jordi Real for their valuable assistance in conducting the  
58 statistical analysis. CIBER of Diabetes and Associated Metabolic Diseases is an initiative from  
59 Instituto de Salud Carlos III (Plan Nacional de I+D+I and Fondo Europeo de Desarrollo Regional).  
60

**Author Contributions** MF, EC and DM conceived and designed the study; MBV, JFN, and MMC participated in the study design; MBV, MF, NA, MGC, NM, AM and CC collected the data; EC and JRM performed the statistical analyses; MF, EC, MMC and DM wrote the manuscript. All authors critically reviewed the manuscript and approved the final version to be published.

**Funding** This study was funded by Institut Universitari d'Investigació en Atenció Primària Jordi Gol (IDIAP Jordi Gol).

**Competing interests** None declared.

**Ethics approval** The project was approved by the Ethics Committee of the Primary Health Care University Research Institute (IDIAP) Jordi Gol (PI12/043) Barcelona, Spain.

**Data sharing statement** Readers may contact Dr Didac Mauricio (didacmauricio@gmail.com) regarding the data.

**Patient consent for publication** Not required.

**The original protocol for the study** Readers may find the Cohort description in *BMJ Open* 2017;1-8. doi:10.1136/bmjopen-2016-015158.

## References

1. Olson DE, Rhee MK, Herrick K, et al. Screening for diabetes and pre-diabetes with proposed A1C-based diagnostic criteria. *Diabetes Care* 2010;33:2184-2189. doi:10.2337/dc10-0433
2. American Diabetes Association. 2. Classification and Diagnosis of Diabetes. *Diabetes Care* 2016;40:S11-S24. doi:10.2337/dc17-S005
3. Brannick B, Wynn A, Dagogo-Jack S. Prediabetes as a toxic environment for the initiation of microvascular and macrovascular complications. *Exp Biol Med* 2016;241:1323-1331. doi:10.1177/1535370216654227
4. Ferrannini E. Definition of intervention points in prediabetes. *Lancet Diabetes Endocrinol* 2014;8:1-9. doi:10.1016/S2213-8587(13)70175-X
5. American Diabetes Association. 2. Classification and Diagnosis of Diabetes. Standards of Medical Care in Diabetes – 2019. *Diabetes Care* 2019;42:S13-S28. doi: [10.2337/dc19-S002](https://doi.org/10.2337/dc19-S002)
6. International Diabetes Federation Diabetes Atlas. 8th ed, 2017. <http://www.diabetesatlas.org/> (accessed June 2019)
7. Centers for Disease Control and Prevention. National Diabetes Statistics Report, 2017. Atlanta, GA: Centers for Disease Control and Prevention, U.S. Dept of Health and Human

- Services; 2017. <https://www.cdc.gov/diabetes/data/statistics/statistics-report.html> (accessed June 2019)
8. Soriguer F, Goday A, Bosch-Comas A, *et al.* Prevalence of diabetes mellitus and impaired glucose regulation in Spain: the Di@bet.es Study. *Diabetologia* 2012;55:88-93. doi:10.1007/s00125-011-2336-9
  9. Mata-Cases M, Artola S, Escalada J, *et al.* Consenso sobre la detección y el manejo de la prediabetes. Grupo de Trabajo de Consensos y Guías Clínicas de la Sociedad Española de Diabetes. *Endocrinol Nutr* 2015;1-14. doi:10.1016/j.endonu.2014.10.008
  10. Nathan DM, Davidson MB, DeFronzo RA, *et al.* Impaired Fasting Glucose and Impaired Glucose Tolerance: Implications for care. *Diabetes Care* 2007;30:753-759. doi:10.2337/dc07-9920
  11. Tabak AG, Herder C, Rathmann W, *et al.* Prediabetes: a high-risk state for diabetes development. *Lancet* 2012;379:2279-2290. doi:10.1016/S0140-6736(12)60283-9
  12. Tuomilehto J, Lindström J, Eriksson JG, *et al.* Prevention of type 2 diabetes mellitus by changes in lifestyle among subjects with impaired glucose tolerance. *N Engl J Med* 2001;344:1343-1350. doi:10.1056/NEJM200105033441801
  13. Knowler WC, Barrett-Connor E, Fowler S, *et al.* Reduction in the Incidence of Type 2 Diabetes with Lifestyle Intervention or Metformin. *N Engl J Med* 2002;346:393-403. doi:10.1056/NEJMoa012512
  14. Ramachandran A, Snehalatha C, Mary S, *et al.* The Indian Diabetes Prevention Programme shows that lifestyle modification and metformin prevent type 2 diabetes in Asian Indian subjects with impaired glucose tolerance (IDPP-1). *Diabetologia* 2006;49:289-297. doi:10.1007/s00125-005-0097-z
  15. Gerstein HC, Santaguida P, Raina P, *et al.* Annual incidence and relative risk of diabetes in people with various categories of dysglycemia: A systematic overview and meta-analysis of prospective studies. *Diabetes Res Clin Pract* 2007;78(3):305-312. doi:10.1016/j.diabres.2007.05.004.
  16. Paulweber B, Valensi P, Lindström J, *et al.* A European evidence-based guideline for the prevention of type 2 diabetes. *Horm Metab Res* 2010;42:S3-S36. doi:10.1055/s-0029-1240928
  17. Vilanova MB, Falguera M, Marsal JR, *et al.* Prevalence, clinical features and risk assessment of pre-diabetes in Spain: the prospective Mollerussa cohort study. *BMJ Open* 2017;1-8. doi:10.1136/bmjopen-2016-015158

1  
2  
3  
4  
5  
6  
7  
8  
9  
10  
11  
12  
13  
14  
15  
16  
17  
18  
19  
20  
21  
22  
23  
24  
25  
26  
27  
28  
29  
30  
31  
32  
33  
34  
35  
36  
37  
38  
39  
40  
41  
42  
43  
44  
45  
46  
47  
48  
49  
50  
51  
52  
53  
54  
55  
56  
57  
58  
59  
60

18. Bernal-Delgado E, García-Armesto S, Oliva J, Sánchez Martínez FI, Repullo JR, Peña-Longobardo LM, Ridao-López M, Hernández-Quevedo C. Spain: Health system review. *Health Syst Transit*, 2018;20(2):1–179.
19. Bedogni G, Bellentani S, Miglioli L, et al. The Fatty Liver Index: a simple and accurate predictor of hepatic steatosis in the general population. *BMC Gastroenterol* 2006;6:44-47. doi:10.1186/1471-230X-6-33
20. Levy JC, Matthews DR, Hermans MP. Correct Homeostasis Model Assessment (HOMA) Evaluation Uses the Computer Program. *Diabetes Care* 1998;21:2191-2. doi:10.2337/diacare.21.12.2191
21. Levey AS, Levey, Stevens LA, et al. A new equation to estimate glomerular filtration rate. *Ann Intern Med* 2009;150:604-612. doi:10.7326/0003-4819-150-9-200905050-00006
22. OECD/Eurostat/UNESCO Institute for Statistics. ISCED 2011 Operational Manual: guidelines for Classifying National Education Programmes and Related Qualifications. Paris: OECD Publishing, 2015
23. Roman-Viñas B, Serra-Majem L, Hagströmer M, et al. International Physical Activity Questionnaire: Reliability and validity in a Spanish population. *Eur J Sport Sci* 2010;10:297-304. doi:10.1080/17461390903426667
24. Mainous AG III, Tanner RJ, Baker R, et al. Prevalence of prediabetes in England from 2003 to 2011: population-based, cross-sectional study. *BMJ Open* 2014;4:1-8. doi:10.1136/bmjopen-2014-005002
25. Menke A, Casagrande S, Geiss L, Cowie CC. Prevalence of and Trends in Diabetes Among Adults in the United States, 1988-2012. *JAMA* 2015;314:1021-1029. doi:10.1001/jama.2015.10029
26. Wang L, Gao P, Zhang M, et al. Prevalence and Ethnic Pattern of Diabetes and Prediabetes in China in 2013. *JAMA* 2017;317:2515-2516. doi:10.1001/jama.2017.7596
27. Unwin N, Howitt C, Rose AM, et al. Prevalence and phenotype of diabetes and prediabetes using fasting glucose vs HbA1c in a Caribbean population. *J Glob Health*. 2017;7:1-11. doi:10.7189/jogh.07.020407
28. Soriguer F, Rojo-Martínez G, Almaraz MC, et al. Incidence of type 2 diabetes in southern Spain (Pizarra Study). *Eur J Clin Invest* 2008;38:126-133. doi:10.1111/j.1365-2362.2007.01910.x

- 1
  - 2
  - 3
  - 4
  - 5
  - 6
  - 7
  - 8
  - 9
  - 10
  - 11
  - 12
  - 13
  - 14
  - 15
  - 16
  - 17
  - 18
  - 19
  - 20
  - 21
  - 22
  - 23
  - 24
  - 25
  - 26
  - 27
  - 28
  - 29
  - 30
  - 31
  - 32
  - 33
  - 34
  - 35
  - 36
  - 37
  - 38
  - 39
  - 40
  - 41
  - 42
  - 43
  - 44
  - 45
  - 46
  - 47
  - 48
  - 49
  - 50
  - 51
  - 52
  - 53
  - 54
  - 55
  - 56
  - 57
  - 58
  - 59
  - 60
29. DECODE study group. Age- and Sex-Specific Prevalences of Diabetes and Impaired Glucose Regulation in 13 European Cohorts. *Diabetes Care*. 2003;26:61-69. doi:10.2337/diacare.26.1.61
30. Edelstein SL, Knowler WC, Bain RP, et al. Predictors of progression from impaired glucose tolerance to NIDDM: an analysis of six prospective studies. *Diabetes* 1997;46:701-710. doi: 10.2337/diab.46.4.701
31. Burke JP, Williams K, Gaskill SP, et al. Rapid Rise in the Incidence of Type 2 Diabetes From 1987 to 1996. *Arch Intern Med* 1999:1450-1456.
32. Cowie CC, Rust KF, Byrd-Holt DD, et al. Prevalence of Diabetes and Impaired Fasting Glucose in Adults in the U.S. Population: National Health and Nutrition Examination Survey 1999-2002. *Diabetes Care* 2006;29:1263-1268. doi:10.2337/dc06-0062
33. Bullard KM, Saydah SH, Imperatore G, et al. Secular Changes in U.S. Prediabetes Prevalence Defined by Hemoglobin A. *Diabetes Care* 2013;36:2286-2293. doi:10.2337/dc12-2563/-/DC1
34. Menke A, Casagrande S, Cowie CC. Contributions of A1c, fasting plasma glucose, and 2-hour plasma glucose to prediabetes prevalence: NHANES 2011-2014. *Ann Epidemiol* 2018;28:681-685.e682. doi:10.1016/j.annepidem.2018.07.012
35. Giráldez-García C, Sangrós FJ, Díaz-Redondo A, et al. Cardiometabolic Risk Profiles in Patients With Impaired Fasting Glucose and/or Hemoglobin A1c 5.7% to 6.4%. *Medicine* 2015;94:e1935-e1938. doi:10.1097/MD.0000000000001935
36. Franch-Nadal J, Caballería L, Mata-Cases M, et al. Fatty liver index is a predictor of incident diabetes in patients with prediabetes: The PREDAPS study. *PLoS One* 2018;13:e0198327-17. doi:10.1371/journal.pone.0198327
37. Huang Y, Cai X, Mai W, et al. Association between prediabetes and risk of cardiovascular disease and all cause mortality: systematic review and meta-analysis. *BMJ* 2016;355:i5953. doi:10.1136/bmj.i5953
38. Levitan EB, Song Y, Ford ES, Liu S. Is Nondiabetic Hyperglycemia a Risk Factor for Cardiovascular Disease? *Arch Intern Med* 2004:2147-2155. doi: 10.1001/archinte.164.19.2147
39. Vistisen D, Kivimaki M, Perreault L, et al. Reversion from prediabetes to normoglycaemia and risk of cardiovascular disease and mortality: the Whitehall II cohort study. *Diabetologia* 2019:1-6. doi:10.1007/s00125-019-4895-0

- 1  
2  
3  
4  
5  
6  
7  
8  
9  
10  
11  
12  
13  
14  
15  
16  
17  
18  
19  
20  
21  
22  
23  
24  
25  
26  
27  
28  
29  
30  
31  
32  
33  
34  
35  
36  
37  
38  
39  
40  
41  
42  
43
40. Giráldez-García C, García Soidán FJ, Serrano Martín R, et al. Evolución de pacientes con prediabetes en Atención Primaria de Salud (PREDAPS): resultados del primer año de seguimiento. *Diabetes practica* 2014;5:1-48. <http://www.diabetespractica.com/public/numeros/articulo/92>
  41. Díaz-Redondo A, Giraldez-Garcia C, Carrillo L, et al. Modifiable risk factors associated with prediabetes in men and women: a cross-sectional analysis of the cohort study in primary health care on the evolution of patients with prediabetes (PREDAPS-Study). *BCM Fam Pract* 2015:1-9. doi:10.1186/s12875-014-0216-3
  42. Unwin N, Shaw J, Zimmet P, et al. Impaired glucose tolerance and impaired fasting glycaemia: the current status on definition and intervention. *Diabet Med* 2002;19:708-723.
  43. Gossain VV, Aldasouqi S. The challenge of undiagnosed pre-diabetes, diabetes and associated cardiovascular disease. *Int JDiabetes Mellit* 2010;2:43-46. doi:10.1016/j.ijdm.2009.10.004
  44. Droumaguet C, Balkau B, Simon D, et al. Use of HbA1c in predicting progression to diabetes in French men and women: data from an Epidemiological Study on the Insulin Resistance Syndrome (DESIR). *Diabetes Care* 2006;29:1619-1625. doi:10.2337/dc05-2525.
  45. Selvin E, Steffes MW, Zhu H, et al. Glycated Hemoglobin, Diabetes, and Cardiovascular Risk in Nondiabetic Adults. *N Engl J Med* 2010;362:800-811. doi:10.1056/NEJMoa0908359
  46. World Health Organization. Use of Glycated Haemoglobin (HbA1c) in the Diagnosis of Diabetes Mellitus. Ginebra: World Health Organization, 2011.

#### FIGURE LEGENDS

45  
46  
47  
48  
49  
50  
51  
52  
53  
54  
55  
56  
57  
58  
59  
60

**Figure 1.** Flow diagram of subjects at baseline and after follow-up.

**Figure 2.** Multivariate logistic regression models **a)** model of prediabetes *versus* normoglycaemic state in the Mollerussa cohort at baseline. Significant p values are shown in bold. eGFR, estimated glomerular filtration rate. Hosmer and Lemeshow Test p=0.295. **b)** model of normalized *versus* persisted in subjects with follow-up data. Significant p values are shown in bold. Hosmer and Lemeshow Test p= 0.931.

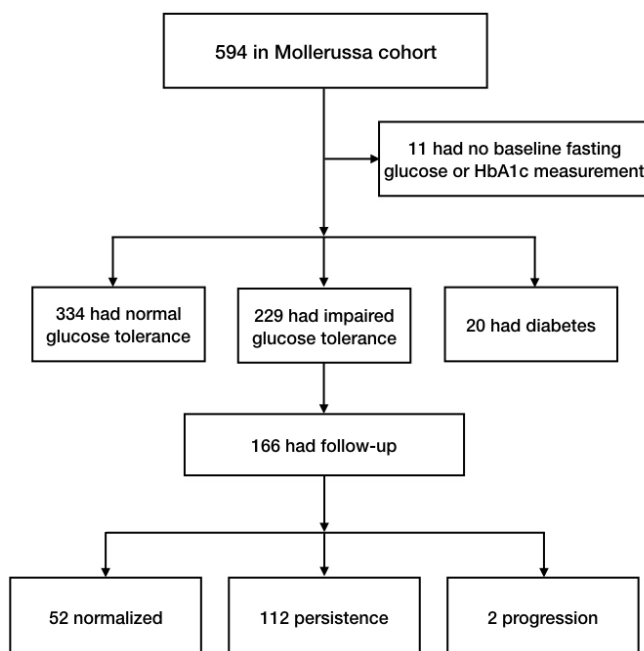

31 Figure 1. Flow diagram of subjects at baseline and after follow-up.

32  
33 361x270mm (72 x 72 DPI)

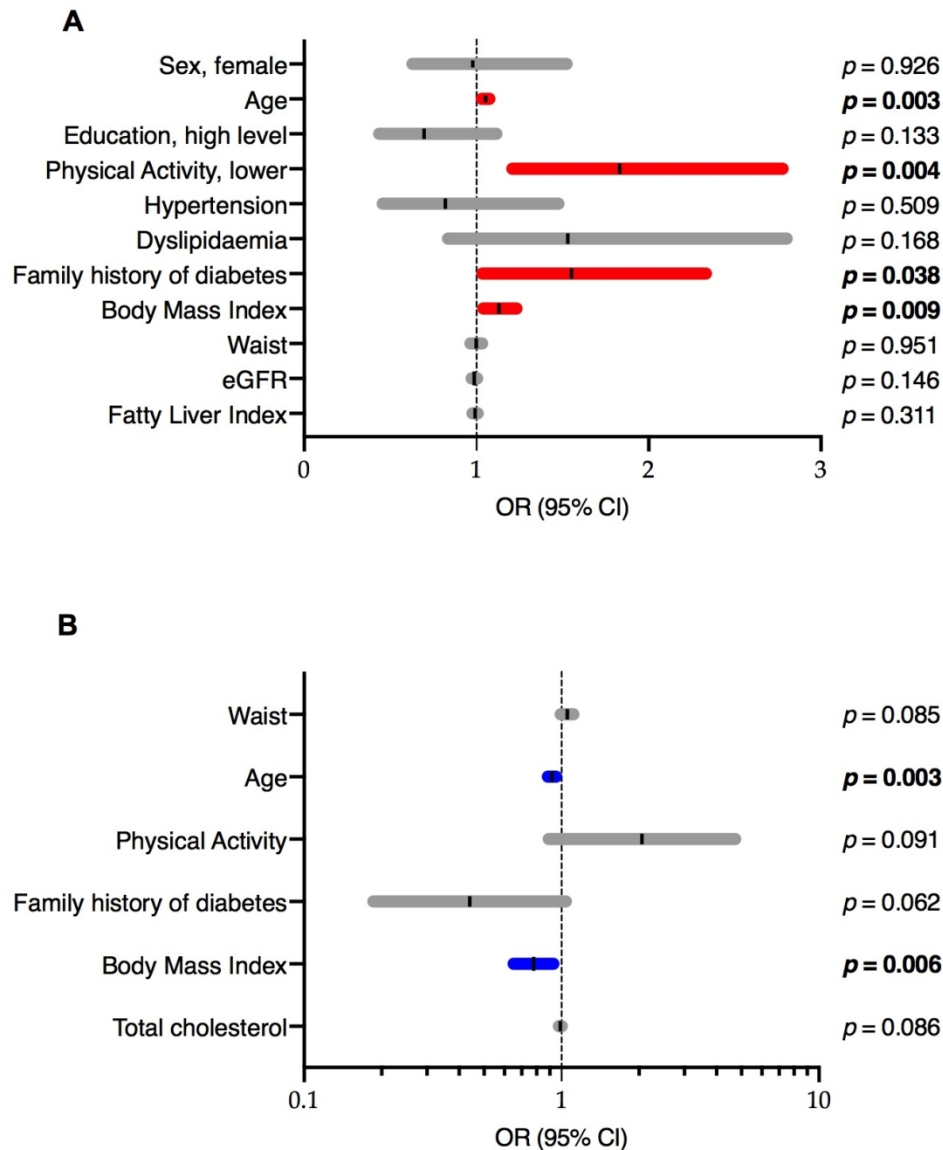

Figure 2. Multivariate logistic regression models a) model of prediabetes versus normoglycaemic state in the Mollerussa cohort at baseline. Significant p values are shown in bold. eGFR, estimated glomerular filtration rate. Hosmer and Lemeshow Test  $p=0.295$ . b) model of normalized versus persisted in subjects with follow-up data. Significant p values are shown in bold. Hosmer and Lemeshow Test  $p= 0.931$ .

116x142mm (300 x 300 DPI)



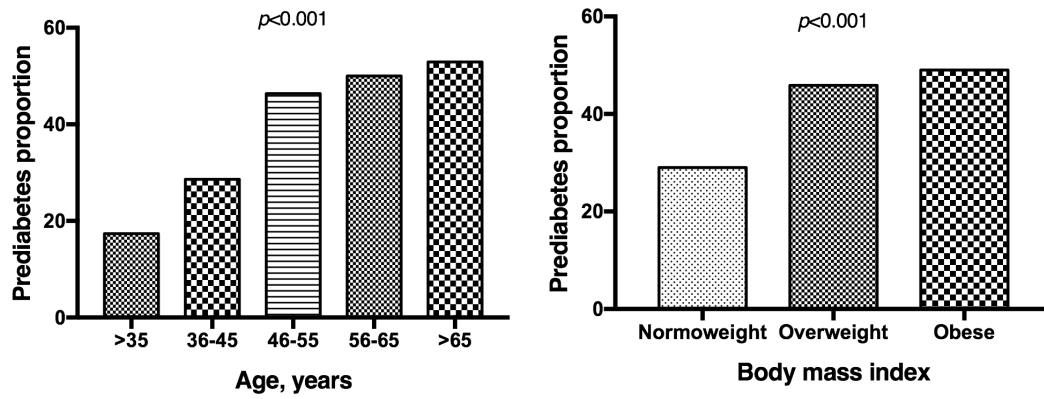

**Supplementary Figure 1.** Proportion of patients with prediabetes. A) Stratified by age.  
B) Stratified by body mass index.

**Supplementary Table 1.** Logistic regression model of isolated fasting plasma glucose

|                            | OR    | 95% CI        | p value      |
|----------------------------|-------|---------------|--------------|
| Sex                        | 0.683 | 0.372 - 1.254 | 0.219        |
| Age                        | 1.032 | 1.008 - 1.057 | <b>0.009</b> |
| Education                  | 0.625 | 0.351 - 1.111 | 0.109        |
| Physical activity          | 0.535 | 0.318 - 0.899 | <b>0.018</b> |
| Family history of diabetes | 1.798 | 1.067 - 3.028 | <b>0.028</b> |
| Hypertension               | 1.423 | 0.722 - 2.805 | 0.309        |
| Body mass index            | 0.994 | 0.890 - 1.110 | 0.914        |
| Waist circumference        | 1.006 | 0.962 - 1.053 | 0.789        |
| Fatty liver index          | 1.014 | 0.990 - 1.038 | 0.268        |
| Total cholesterol          | 1.012 | 0.993 - 1.032 | 0.227        |
| Triglycerides              | 0.998 | 0.993 - 1.003 | 0.402        |
| LDL-cholesterol            | 0.986 | 0.965 - 1.008 | 0.212        |

**Supplementary Table 2.** Logistic regression model of isolated HbA1c

|                     | OR    | 95% CI        | p value          |
|---------------------|-------|---------------|------------------|
| Sex                 | 1.304 | 0.830 - 2.050 | 0.249            |
| Age                 | 1.048 | 1.029 - 1.067 | <b>&lt;0.001</b> |
| Education           | 0.917 | 0.575 - 1.461 | 0.715            |
| Physical activity   | 0.668 | 0.440 - 1.013 | 0.058            |
| Hypertension        | 0.848 | 0.481 - 1.497 | 0.570            |
| Body mass index     | 1.080 | 0.990 - 1.179 | 0.083            |
| Waist circumference | 0.996 | 0.963 - 1.030 | 0.822            |
| Fatty liver index   | 1.000 | 0.982 - 1.018 | 0.960            |
| Total cholesterol   | 1.000 | 0.994 - 1.006 | 0.996            |
| Triglycerides       | 0.999 | 0.996 - 1.002 | 0.724            |

**Supplementary Table 3.** Logistic regression model of fasting plasma glucose and HbA1c

|                     | OR    | 95% CI        | p value          |
|---------------------|-------|---------------|------------------|
| Sex, female         | 1.559 | 0.753 - 3.225 | 0.232            |
| Age                 | 1.056 | 1.026 - 1.086 | <b>&lt;0.001</b> |
| Education level     | 0.914 | 0.457 - 1.828 | 0.799            |
| Physical activity   | 0.610 | 0.322 - 1.157 | 0.130            |
| Hypertension        | 1.665 | 0.782 - 3.545 | 0.186            |
| Dyslipidaemia       | 0.818 | 0.357 - 1.870 | 0.633            |
| Body mass index     | 0.901 | 0.788 - 1.030 | 0.128            |
| Waist circumference | 1.012 | 0.960 - 1.066 | 0.665            |
| Triglycerides       | 0.999 | 0.993 - 1.004 | 0.594            |
| Fatty liver index   | 1.031 | 1.002 - 1.061 | <b>0.037</b>     |

**Supplementary Table 4.** Logistic regression model of normalized *versus* persisted in subjects with follow-up data.

|                      | OR    | 95% CI        | p value      |
|----------------------|-------|---------------|--------------|
| Sex(1)               | 1.025 | 0.392 – 2.682 | 0.960        |
| Age                  | 0.956 | 0.917 – 0.998 | <b>0.039</b> |
| Education(1)         | 1.327 | 0.513 – 3.431 | 0.560        |
| Physical_Activity(1) | 1.885 | 0.798 – 4.453 | 0.149        |
| Treat_HT(1)          | 0.865 | 0.268 – 2.791 | 0.808        |
| Family_history_DM(1) | 0.428 | 0.176 – 1.040 | 0.061        |
| BMI                  | 0.749 | 0.605 – 0.926 | <b>0.007</b> |
| Waist                | 1.037 | 0.959 – 1.121 | 0.365        |
| FLI                  | 1.022 | 0.982 – 1.063 | 0.292        |
| HOMA2_IR             | 0.620 | 0.240 – 1.604 | 0.324        |
| Total_cholesterol    | 0.986 | 0.972 – 1.000 | 0.052        |
| HDL_cholesterol      | 1.015 | 0.978 – 1.052 | 0.435        |



34  
35  
36  
37  
38  
39  
40  
41

| Test Result Variable(s) | Area  | Std. Error | Asymptotic Sig. | Asymptotic 95% Confidence Interval |             |
|-------------------------|-------|------------|-----------------|------------------------------------|-------------|
|                         |       |            |                 | Lower Bound                        | Upper Bound |
| Predicted probability   | 0.771 | 0.040      | 0.000           | 0.693                              | 0.849       |
| Age                     | 0.347 | 0.049      | 0.002           | 0.251                              | 0.442       |
| Body Mass Index         | 0.332 | 0.045      | 0.001           | 0.244                              | 0.421       |

42  
43  
44  
45  
46  
47  
48  
49  
50  
51  
52  
53  
54  
55  
56  
57  
58  
59  
60

**Supplementary Figure 2.** Receiver operating characteristics (ROC) curve showing the relationship between sensitivity and 1-specificity in determining the discriminatory ability of the logistic regression model and the variables age and body mass index separately.

# Reporting checklist for cohort study.

Based on the STROBE cohort guidelines.

## Instructions to authors

Complete this checklist by entering the page numbers from your manuscript where readers will find each of the items listed below.

Your article may not currently address all the items on the checklist. Please modify your text to include the missing information. If you are certain that an item does not apply, please write "n/a" and provide a short explanation.

Upload your completed checklist as an extra file when you submit to a journal.

In your methods section, say that you used the STROBE cohort reporting guidelines, and cite them as:

von Elm E, Altman DG, Egger M, Pocock SJ, Gøtzsche PC, Vandenbroucke JP. The Strengthening of Reporting of Observational Studies in Epidemiology (STROBE) Statement: guidelines for reporting observational studies.

|                           |                     | Reporting Item                                                                                  | Page Number |
|---------------------------|---------------------|-------------------------------------------------------------------------------------------------|-------------|
| <b>Title and abstract</b> |                     |                                                                                                 |             |
| Title                     | <a href="#">#1a</a> | Indicate the study's design with a commonly used term in the title or the abstract              | 1           |
| Abstract                  | <a href="#">#1b</a> | Provide in the abstract an informative and balanced summary of what was done and what was found | 2-3         |
| <b>Introduction</b>       |                     |                                                                                                 |             |
| Background / rationale    | <a href="#">#2</a>  | Explain the scientific background and rationale for the investigation being reported            | 3-4         |
| Objectives                | <a href="#">#3</a>  | State specific objectives, including any prespecified hypotheses                                | 4           |
| <b>Methods</b>            |                     |                                                                                                 |             |

|    |                      |                      |                                                                   |     |
|----|----------------------|----------------------|-------------------------------------------------------------------|-----|
| 1  | Study design         | <a href="#">#4</a>   | Present key elements of study design early in the paper           | 4   |
| 2  |                      |                      |                                                                   |     |
| 3  | Setting              | <a href="#">#5</a>   | Describe the setting, locations, and relevant dates, including    | 4-5 |
| 4  |                      |                      | periods of recruitment, exposure, follow-up, and data collection  |     |
| 5  |                      |                      |                                                                   |     |
| 6  |                      |                      |                                                                   |     |
| 7  | Eligibility criteria | <a href="#">#6a</a>  | Give the eligibility criteria, and the sources and methods of     | 4-5 |
| 8  |                      |                      | selection of participants. Describe methods of follow-up.         |     |
| 9  |                      |                      |                                                                   |     |
| 10 |                      |                      |                                                                   |     |
| 11 | Eligibility criteria | <a href="#">#6b</a>  | For matched studies, give matching criteria and number of         | n/a |
| 12 |                      |                      | exposed and unexposed                                             |     |
| 13 |                      |                      |                                                                   |     |
| 14 |                      |                      |                                                                   |     |
| 15 | Variables            | <a href="#">#7</a>   | Clearly define all outcomes, exposures, predictors, potential     | 5   |
| 16 |                      |                      | confounders, and effect modifiers. Give diagnostic criteria, if   |     |
| 17 |                      |                      | applicable                                                        |     |
| 18 |                      |                      |                                                                   |     |
| 19 |                      |                      |                                                                   |     |
| 20 |                      |                      |                                                                   |     |
| 21 | Data sources /       | <a href="#">#8</a>   | For each variable of interest give sources of data and details of | 4-5 |
| 22 | measurement          |                      | methods of assessment (measurement). Describe                     |     |
| 23 |                      |                      | comparability of assessment methods if there is more than one     |     |
| 24 |                      |                      | group. Give information separately for for exposed and            |     |
| 25 |                      |                      | unexposed groups if applicable.                                   |     |
| 26 |                      |                      |                                                                   |     |
| 27 |                      |                      |                                                                   |     |
| 28 |                      |                      |                                                                   |     |
| 29 | Bias                 | <a href="#">#9</a>   | Describe any efforts to address potential sources of bias         | 6   |
| 30 |                      |                      |                                                                   |     |
| 31 |                      |                      |                                                                   |     |
| 32 | Study size           | <a href="#">#10</a>  | Explain how the study size was arrived at                         | 6   |
| 33 |                      |                      |                                                                   |     |
| 34 | Quantitative         | <a href="#">#11</a>  | Explain how quantitative variables were handled in the            | 6   |
| 35 | variables            |                      | analyses. If applicable, describe which groupings were chosen,    |     |
| 36 |                      |                      | and why                                                           |     |
| 37 |                      |                      |                                                                   |     |
| 38 |                      |                      |                                                                   |     |
| 39 |                      |                      |                                                                   |     |
| 40 | Statistical          | <a href="#">#12a</a> | Describe all statistical methods, including those used to control | 6   |
| 41 | methods              |                      | for confounding                                                   |     |
| 42 |                      |                      |                                                                   |     |
| 43 |                      |                      |                                                                   |     |
| 44 | Statistical          | <a href="#">#12b</a> | Describe any methods used to examine subgroups and                | 6   |
| 45 | methods              |                      | interactions                                                      |     |
| 46 |                      |                      |                                                                   |     |
| 47 |                      |                      |                                                                   |     |
| 48 | Statistical          | <a href="#">#12c</a> | Explain how missing data were addressed                           | 5   |
| 49 | methods              |                      |                                                                   |     |
| 50 |                      |                      |                                                                   |     |
| 51 |                      |                      |                                                                   |     |
| 52 | Statistical          | <a href="#">#12d</a> | If applicable, explain how loss to follow-up was addressed        | n/a |
| 53 | methods              |                      |                                                                   |     |
| 54 |                      |                      |                                                                   |     |
| 55 |                      |                      |                                                                   |     |
| 56 | Statistical          | <a href="#">#12e</a> | Describe any sensitivity analyses                                 | 6   |
| 57 | methods              |                      |                                                                   |     |
| 58 |                      |                      |                                                                   |     |
| 59 |                      |                      |                                                                   |     |
| 60 |                      |                      |                                                                   |     |

## Results

|    |                  |                      |                                                                       |
|----|------------------|----------------------|-----------------------------------------------------------------------|
| 1  |                  |                      |                                                                       |
| 2  |                  |                      |                                                                       |
| 3  |                  |                      |                                                                       |
| 4  | Participants     | <a href="#">#13a</a> | Report numbers of individuals at each stage of study—eg 6-7           |
| 5  |                  |                      | numbers potentially eligible, examined for eligibility, confirmed     |
| 6  |                  |                      | eligible, included in the study, completing follow-up, and            |
| 7  |                  |                      | analysed. Give information separately for for exposed and             |
| 8  |                  |                      | unexposed groups if applicable.                                       |
| 9  |                  |                      |                                                                       |
| 10 |                  |                      |                                                                       |
| 11 |                  |                      |                                                                       |
| 12 | Participants     | <a href="#">#13b</a> | Give reasons for non-participation at each stage n/a                  |
| 13 |                  |                      |                                                                       |
| 14 | Participants     | <a href="#">#13c</a> | Consider use of a flow diagram 7                                      |
| 15 |                  |                      |                                                                       |
| 16 |                  |                      |                                                                       |
| 17 | Descriptive data | <a href="#">#14a</a> | Give characteristics of study participants (eg demographic, 7-8       |
| 18 |                  |                      | clinical, social) and information on exposures and potential          |
| 19 |                  |                      | confounders. Give information separately for exposed and              |
| 20 |                  |                      | unexposed groups if applicable.                                       |
| 21 |                  |                      |                                                                       |
| 22 |                  |                      |                                                                       |
| 23 |                  |                      |                                                                       |
| 24 | Descriptive data | <a href="#">#14b</a> | Indicate number of participants with missing data for each 5          |
| 25 |                  |                      | variable of interest                                                  |
| 26 |                  |                      |                                                                       |
| 27 |                  |                      |                                                                       |
| 28 | Descriptive data | <a href="#">#14c</a> | Summarise follow-up time (eg, average and total amount) 5             |
| 29 |                  |                      |                                                                       |
| 30 | Outcome data     | <a href="#">#15</a>  | Report numbers of outcome events or summary measures 6-7              |
| 31 |                  |                      | over time. Give information separately for exposed and                |
| 32 |                  |                      | unexposed groups if applicable.                                       |
| 33 |                  |                      |                                                                       |
| 34 |                  |                      |                                                                       |
| 35 |                  |                      |                                                                       |
| 36 | Main results     | <a href="#">#16a</a> | Give unadjusted estimates and, if applicable, confounder- 6-7         |
| 37 |                  |                      | adjusted estimates and their precision (eg, 95% confidence            |
| 38 |                  |                      | interval). Make clear which confounders were adjusted for and         |
| 39 |                  |                      | why they were included                                                |
| 40 |                  |                      |                                                                       |
| 41 |                  |                      |                                                                       |
| 42 |                  |                      |                                                                       |
| 43 | Main results     | <a href="#">#16b</a> | Report category boundaries when continuous variables were 7           |
| 44 |                  |                      | categorized                                                           |
| 45 |                  |                      |                                                                       |
| 46 |                  |                      |                                                                       |
| 47 | Main results     | <a href="#">#16c</a> | If relevant, consider translating estimates of relative risk into n/a |
| 48 |                  |                      | absolute risk for a meaningful time period                            |
| 49 |                  |                      |                                                                       |
| 50 |                  |                      |                                                                       |
| 51 | Other analyses   | <a href="#">#17</a>  | Report other analyses done—e.g., analyses of subgroups and 7, 9,10    |
| 52 |                  |                      | interactions, and sensitivity analyses                                |
| 53 |                  |                      |                                                                       |
| 54 |                  |                      |                                                                       |

## Discussion

|    |             |                     |                                                                |
|----|-------------|---------------------|----------------------------------------------------------------|
| 55 |             |                     |                                                                |
| 56 |             |                     |                                                                |
| 57 | Key results | <a href="#">#18</a> | Summarise key results with reference to study objectives 10-11 |
| 58 |             |                     |                                                                |
| 59 |             |                     |                                                                |
| 60 |             |                     |                                                                |

|    |                    |                     |                                                                      |     |
|----|--------------------|---------------------|----------------------------------------------------------------------|-----|
| 1  | Limitations        | <a href="#">#19</a> | Discuss limitations of the study, taking into account sources of     | 12  |
| 2  |                    |                     | potential bias or imprecision. Discuss both direction and            |     |
| 3  |                    |                     | magnitude of any potential bias.                                     |     |
| 4  |                    |                     |                                                                      |     |
| 5  |                    |                     |                                                                      |     |
| 6  | Interpretation     | <a href="#">#20</a> | Give a cautious overall interpretation considering objectives,       | 13  |
| 7  |                    |                     | limitations, multiplicity of analyses, results from similar studies, |     |
| 8  |                    |                     | and other relevant evidence.                                         |     |
| 9  |                    |                     |                                                                      |     |
| 10 |                    |                     |                                                                      |     |
| 11 |                    |                     |                                                                      |     |
| 12 | Generalisability   | <a href="#">#21</a> | Discuss the generalisability (external validity) of the study        | n/a |
| 13 |                    |                     | results                                                              |     |
| 14 |                    |                     |                                                                      |     |
| 15 |                    |                     |                                                                      |     |
| 16 | <b>Other</b>       |                     |                                                                      |     |
| 17 | <b>Information</b> |                     |                                                                      |     |
| 18 |                    |                     |                                                                      |     |
| 19 |                    |                     |                                                                      |     |
| 20 | Funding            | <a href="#">#22</a> | Give the source of funding and the role of the funders for the       | 13  |
| 21 |                    |                     | present study and, if applicable, for the original study on which    |     |
| 22 |                    |                     | the present article is based                                         |     |
| 23 |                    |                     |                                                                      |     |
| 24 |                    |                     |                                                                      |     |

25 The STROBE checklist is distributed under the terms of the Creative Commons Attribution License  
 26 CC-BY. This checklist was completed on 28. July 2019 using <https://www.goodreports.org/>, a tool  
 27 made by the [EQUATOR Network](#) in collaboration with [Penelope.ai](#)  
 28  
 29  
 30  
 31  
 32  
 33  
 34  
 35  
 36  
 37  
 38  
 39  
 40  
 41  
 42  
 43  
 44  
 45  
 46  
 47  
 48  
 49  
 50  
 51  
 52  
 53  
 54  
 55  
 56  
 57  
 58  
 59  
 60
