# Supplementary material for: Prevalence of pre-diabetes and undiagnosed diabetes in the Mollerussa prospective observational cohort study in a semi-rural area of Catalonia
Source: PubMed Central journal article supplement — BMJ Open. 2020 Jan 20;10(1):e033332. doi: 10.1136/bmjopen-2019-033332 (PMC7044846; doi:10.1136/bmjopen-2019-033332), 2020-01-20
Supplement: bmjopen-2019-033332supp001.pdf [file bmjopen-2019-033332supp001.pdf]

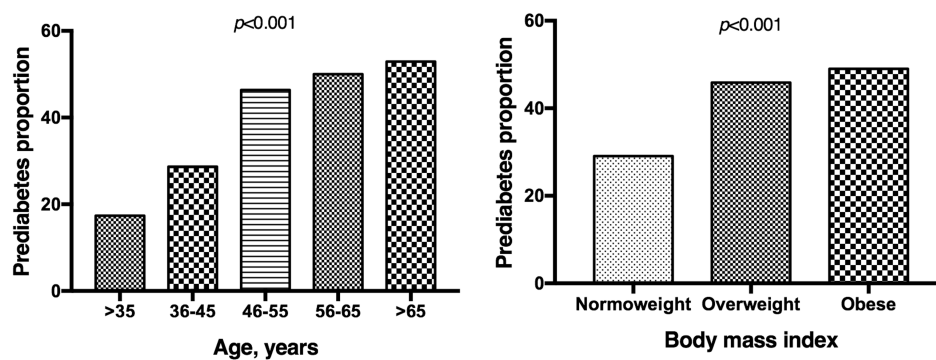

**Supplementary Figure 1.** Proportion of patients with prediabetes. A) Stratified by age. B) Stratified by body mass index.
