# Supplementary material for: Prevalence of pre-diabetes and undiagnosed diabetes in the Mollerussa prospective observational cohort study in a semi-rural area of Catalonia
Source: PubMed Central journal article supplement — BMJ Open. 2020 Jan 20;10(1):e033332. doi: 10.1136/bmjopen-2019-033332 (PMC7044846; doi:10.1136/bmjopen-2019-033332), 2020-01-20
Supplement: bmjopen-2019-033332supp002.pdf [file bmjopen-2019-033332supp002.pdf]

**Supplementary Table 1.** Logistic regression model of isolated fasting plasma glucose

|                            | OR    | 95% CI        | p value      |
|----------------------------|-------|---------------|--------------|
| Sex                        | 0.683 | 0.372 - 1.254 | 0.219        |
| Age                        | 1.032 | 1.008 - 1.057 | <b>0.009</b> |
| Education                  | 0.625 | 0.351 - 1.111 | 0.109        |
| Physical activity          | 0.535 | 0.318 - 0.899 | <b>0.018</b> |
| Family history of diabetes | 1.798 | 1.067 - 3.028 | <b>0.028</b> |
| Hypertension               | 1.423 | 0.722 - 2.805 | 0.309        |
| Body mass index            | 0.994 | 0.890 - 1.110 | 0.914        |
| Waist circumference        | 1.006 | 0.962 - 1.053 | 0.789        |
| Fatty liver index          | 1.014 | 0.990 - 1.038 | 0.268        |
| Total cholesterol          | 1.012 | 0.993 - 1.032 | 0.227        |
| Triglycerides              | 0.998 | 0.993 - 1.003 | 0.402        |
| LDL-cholesterol            | 0.986 | 0.965 - 1.008 | 0.212        |

**Supplementary Table 2.** Logistic regression model of isolated HbA1c

|                     | OR    | 95% CI        | p value          |
|---------------------|-------|---------------|------------------|
| Sex                 | 1.304 | 0.830 - 2.050 | 0.249            |
| Age                 | 1.048 | 1.029 - 1.067 | <b>&lt;0.001</b> |
| Education           | 0.917 | 0.575 - 1.461 | 0.715            |
| Physical activity   | 0.668 | 0.440 - 1.013 | 0.058            |
| Hypertension        | 0.848 | 0.481 - 1.497 | 0.570            |
| Body mass index     | 1.080 | 0.990 - 1.179 | 0.083            |
| Waist circumference | 0.996 | 0.963 - 1.030 | 0.822            |
| Fatty liver index   | 1.000 | 0.982 - 1.018 | 0.960            |
| Total cholesterol   | 1.000 | 0.994 - 1.006 | 0.996            |
| Triglycerides       | 0.999 | 0.996 - 1.002 | 0.724            |

**Supplementary Table 3.** Logistic regression model of fasting plasma glucose and HbA1c

|                     | OR    | 95% CI        | p value          |
|---------------------|-------|---------------|------------------|
| Sex, female         | 1.559 | 0.753 - 3.225 | 0.232            |
| Age                 | 1.056 | 1.026 - 1.086 | <b>&lt;0.001</b> |
| Education level     | 0.914 | 0.457 - 1.828 | 0.799            |
| Physical activity   | 0.610 | 0.322 - 1.157 | 0.130            |
| Hypertension        | 1.665 | 0.782 - 3.545 | 0.186            |
| Dyslipidaemia       | 0.818 | 0.357 - 1.870 | 0.633            |
| Body mass index     | 0.901 | 0.788 - 1.030 | 0.128            |
| Waist circumference | 1.012 | 0.960 - 1.066 | 0.665            |
| Triglycerides       | 0.999 | 0.993 - 1.004 | 0.594            |
| Fatty liver index   | 1.031 | 1.002 - 1.061 | <b>0.037</b>     |

**Supplementary Table 4.** Logistic regression model of normalized *versus* persisted in subjects with follow-up data.

|                      | OR    | 95% CI        | p value      |
|----------------------|-------|---------------|--------------|
| Sex(1)               | 1.025 | 0.392 – 2.682 | 0.960        |
| Age                  | 0.956 | 0.917 – 0.998 | <b>0.039</b> |
| Education(1)         | 1.327 | 0.513 – 3.431 | 0.560        |
| Physical_Activity(1) | 1.885 | 0.798 – 4.453 | 0.149        |
| Treat_HT(1)          | 0.865 | 0.268 – 2.791 | 0.808        |
| Family_history_DM(1) | 0.428 | 0.176 – 1.040 | 0.061        |
| BMI                  | 0.749 | 0.605 – 0.926 | <b>0.007</b> |
| Waist                | 1.037 | 0.959 – 1.121 | 0.365        |
| FLI                  | 1.022 | 0.982 – 1.063 | 0.292        |
| HOMA2_IR             | 0.620 | 0.240 – 1.604 | 0.324        |
| Total_cholesterol    | 0.986 | 0.972 – 1.000 | 0.052        |
| HDL_cholesterol      | 1.015 | 0.978 – 1.052 | 0.435        |
