# Supplementary material for: Prevalence of pre-diabetes and undiagnosed diabetes in the Mollerussa prospective observational cohort study in a semi-rural area of Catalonia
Source: PubMed Central journal article supplement — BMJ Open. 2020 Jan 20;10(1):e033332. doi: 10.1136/bmjopen-2019-033332 (PMC7044846; doi:10.1136/bmjopen-2019-033332), 2020-01-20
Supplement: bmjopen-2019-033332supp003.pdf [file bmjopen-2019-033332supp003.pdf]

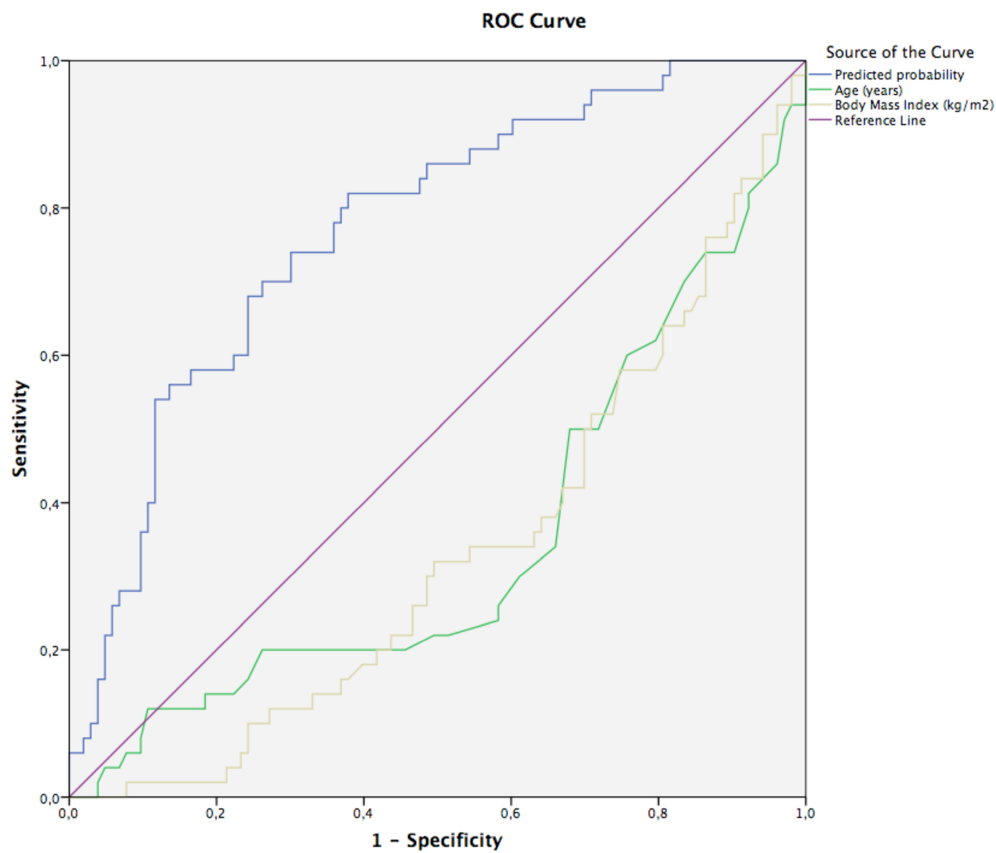

| Test Result Variable(s) | Area  | Std. Error | Asymptotic Sig. | Asymptotic 95% Confidence Interval |             |
|-------------------------|-------|------------|-----------------|------------------------------------|-------------|
|                         |       |            |                 | Lower Bound                        | Upper Bound |
| Predicted probability   | 0.771 | 0.040      | 0.000           | 0.693                              | 0.849       |
| Age                     | 0.347 | 0.049      | 0.002           | 0.251                              | 0.442       |
| Body Mass Index         | 0.332 | 0.045      | 0.001           | 0.244                              | 0.421       |

**Supplementary Figure 2.** Receiver operating characteristics (ROC) curve showing the relationship between sensitivity and 1-specificity in determining the discriminatory ability of the logistic regression model and the variables age and body mass index separately.
